# Supplementary material for: Characterizing gene tree conflict in plastome-inferred phylogenies
Source: PeerJ journal article supplement (doi:10.7717/peerj.7747), 2019-09-24

**accD Saturation (All Bases)**

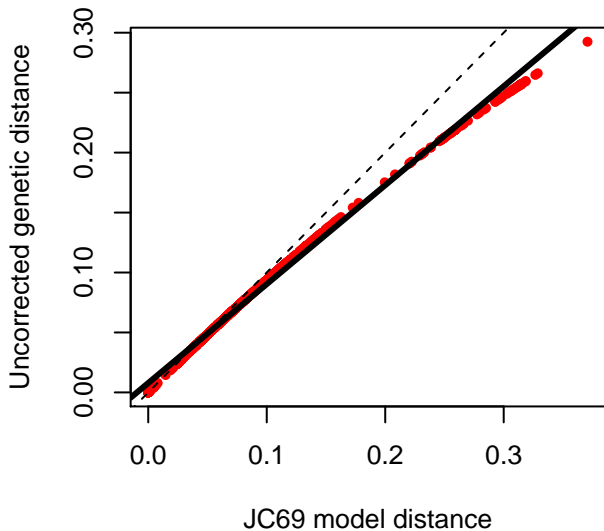

**accD Saturation (1st Pos)**

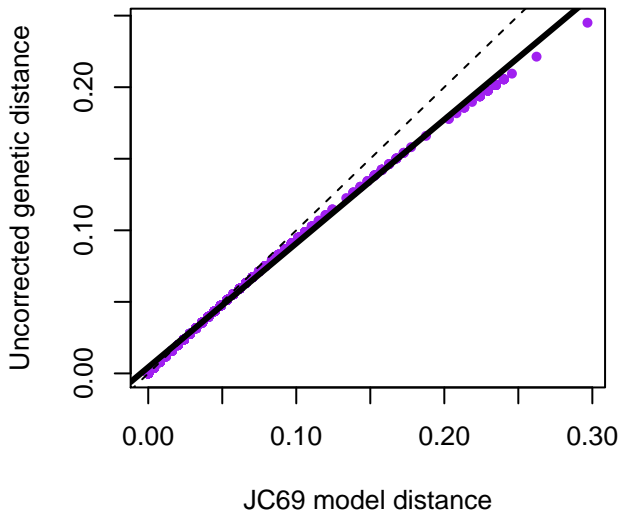

**accD Saturation (2nd Pos)**

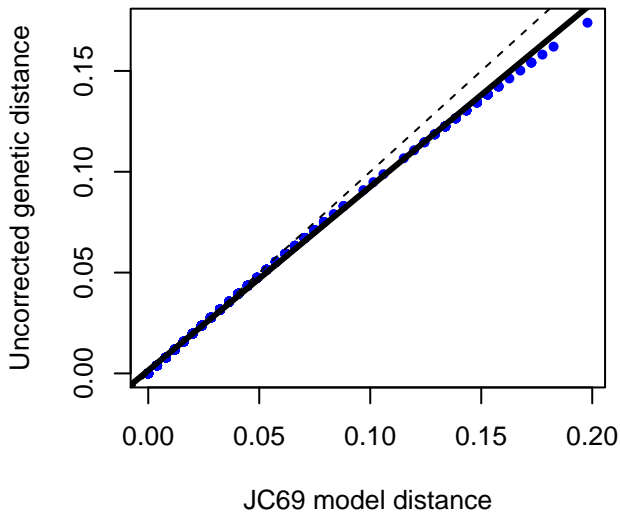

**accD Saturation (3rd Pos)**

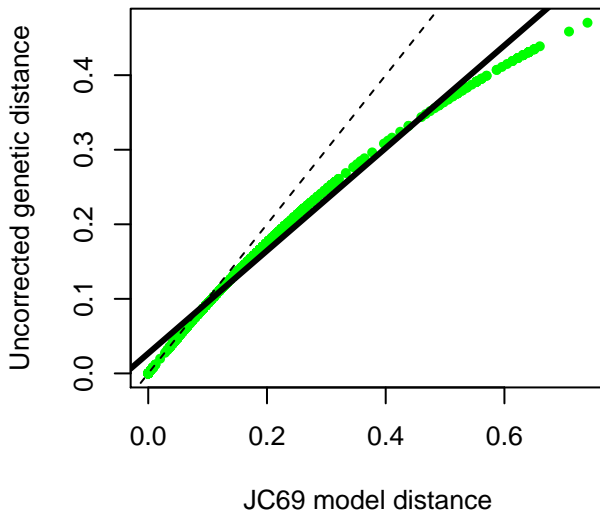

**atpA Saturation (All Bases)**

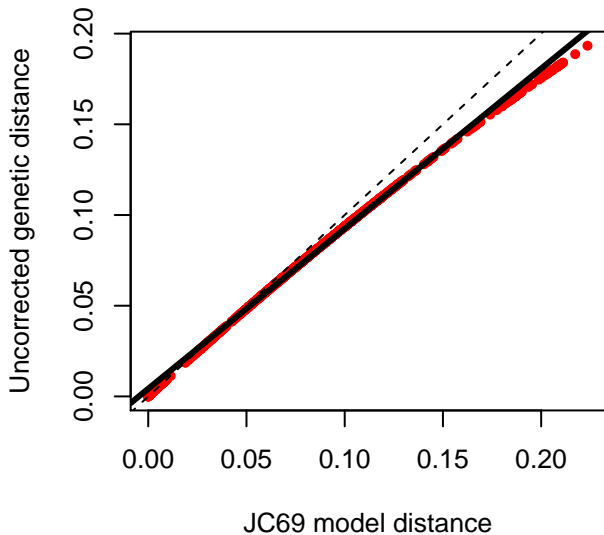

**atpA Saturation (1st Pos)**

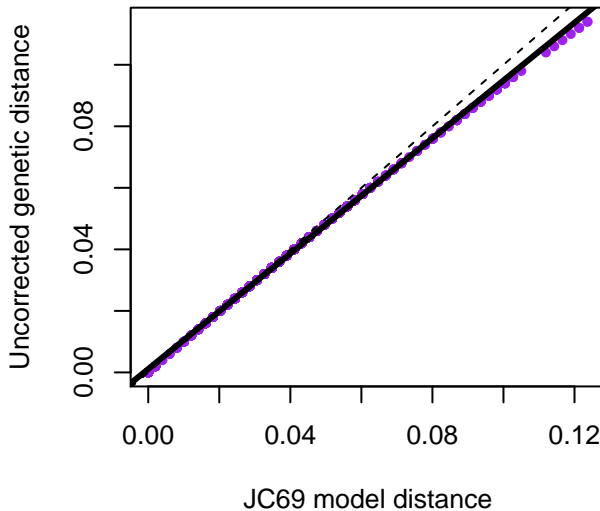

**atpA Saturation (2nd Pos)**

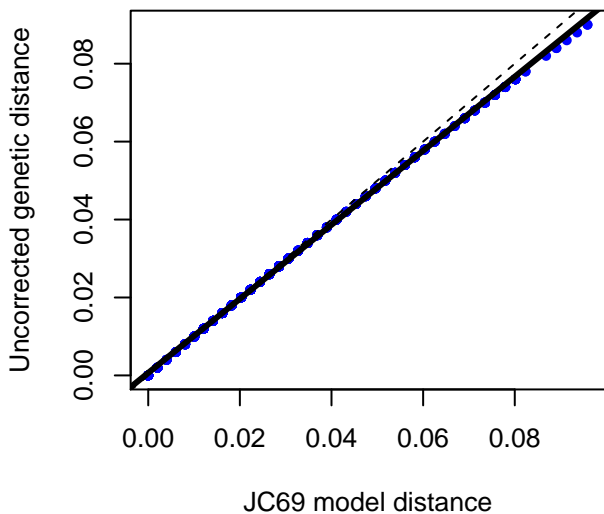

**atpA Saturation (3rd Pos)**

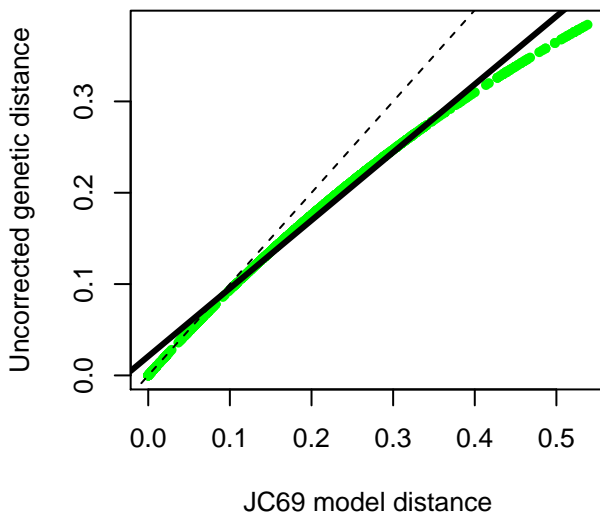

**atpB Saturation (All Bases)**

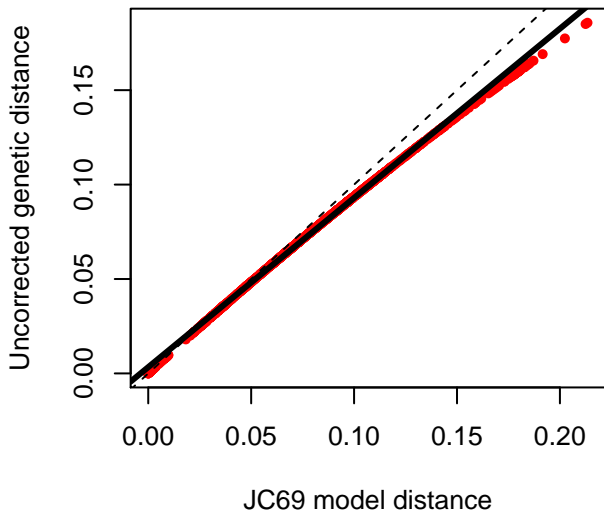

**atpB Saturation (1st Pos)**

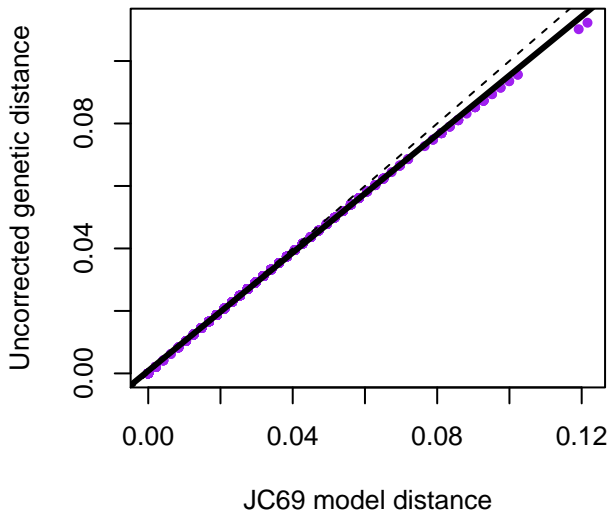

**atpB Saturation (2nd Pos)**

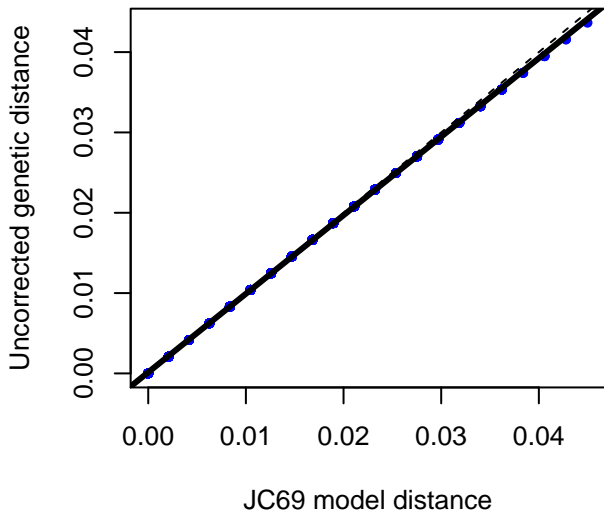

**atpB Saturation (3rd Pos)**

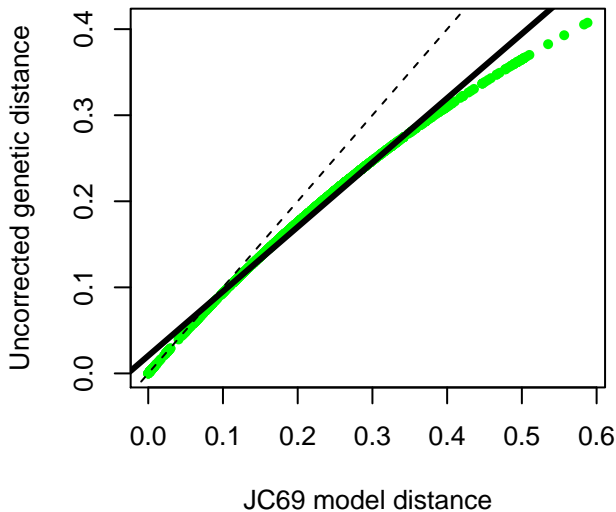

**atpE Saturation (All Bases)**

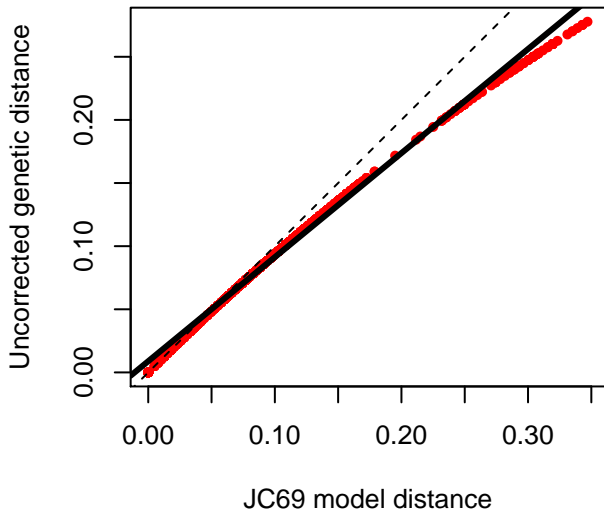

**atpE Saturation (1st Pos)**

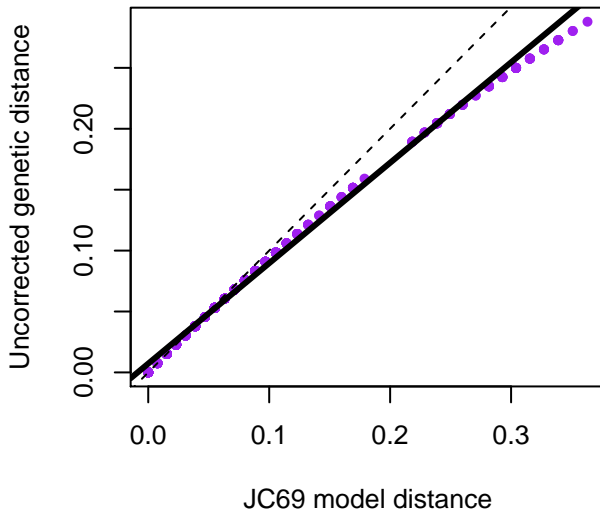

**atpE Saturation (2nd Pos)**

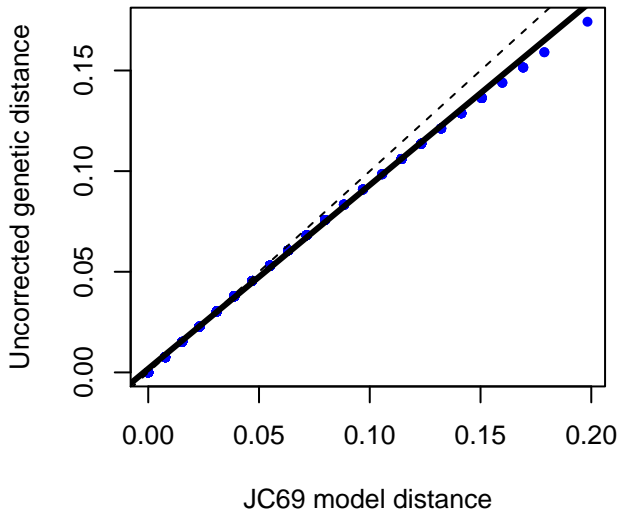

**atpE Saturation (3rd Pos)**

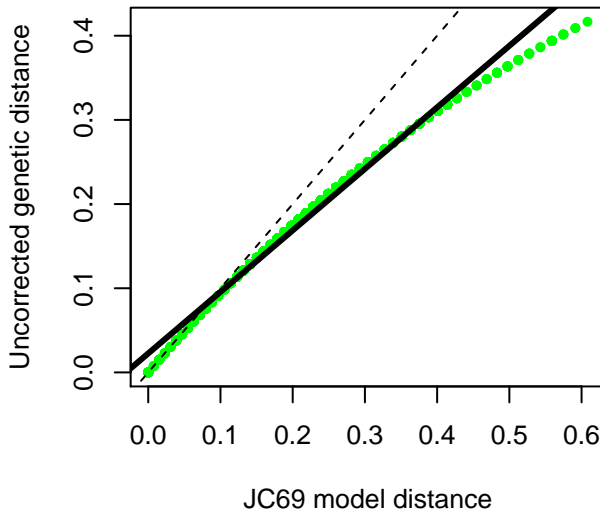

**atpF Saturation (All Bases)**

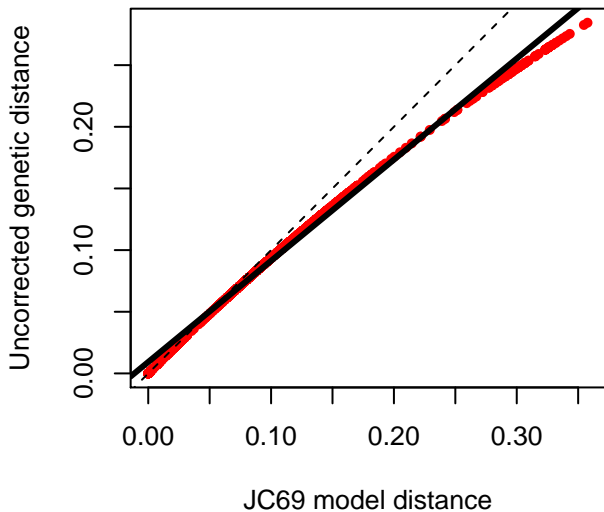

**atpF Saturation (1st Pos)**

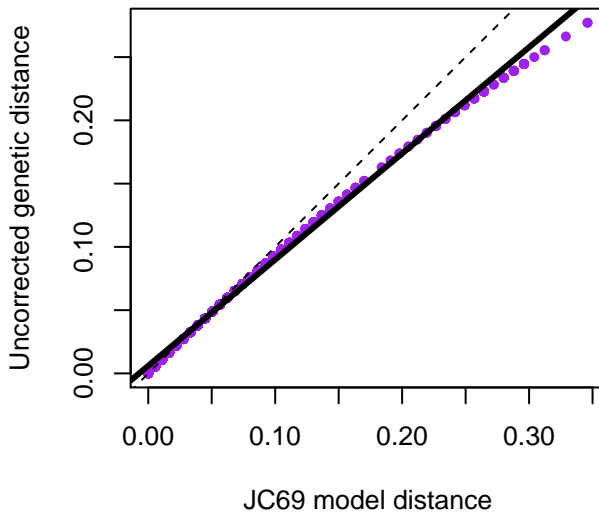

**atpF Saturation (2nd Pos)**

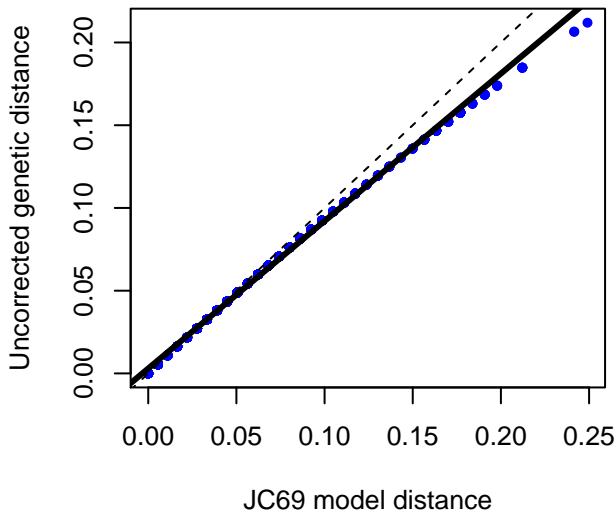

**atpF Saturation (3rd Pos)**

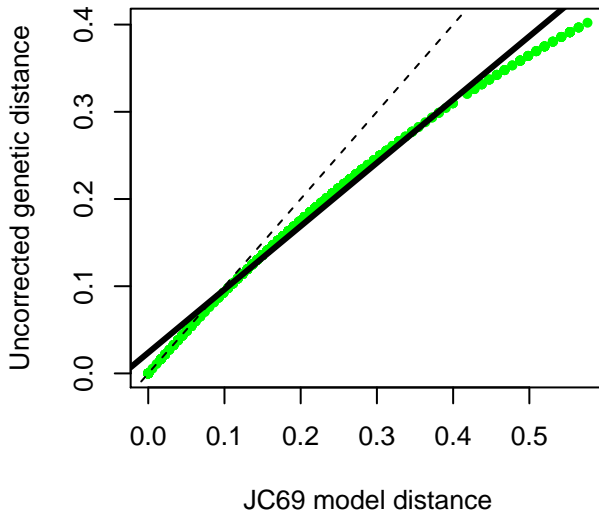

**atpH Saturation (All Bases)**

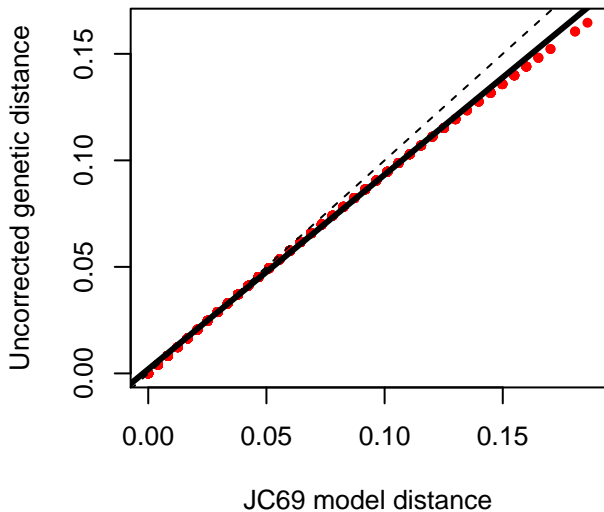

**atpH Saturation (1st Pos)**

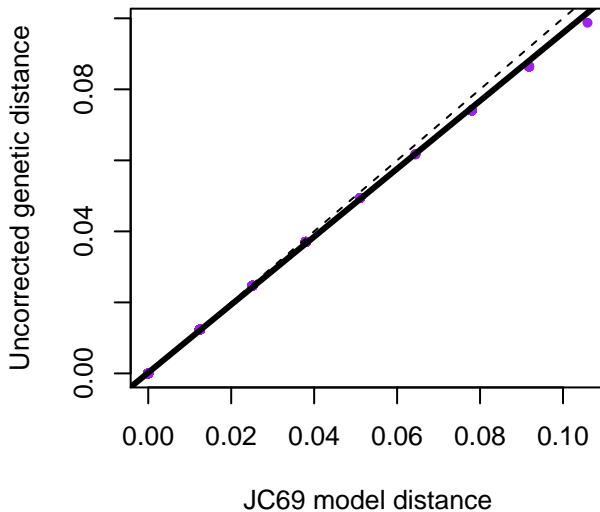

**atpH Saturation (2nd Pos)**

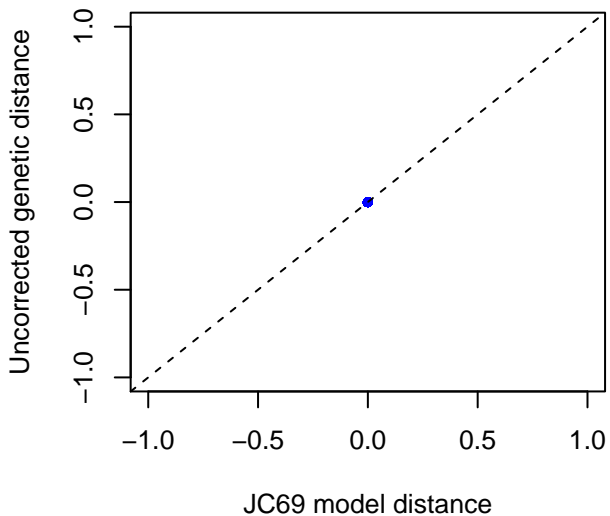

**atpl Saturation (All Bases)**

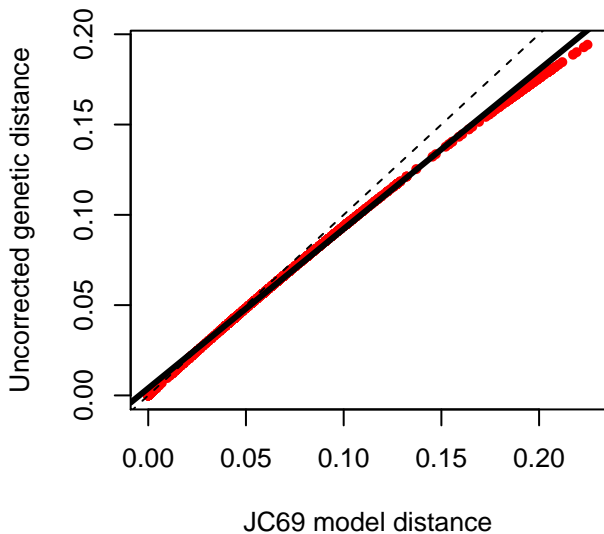

**atpl Saturation (1st Pos)**

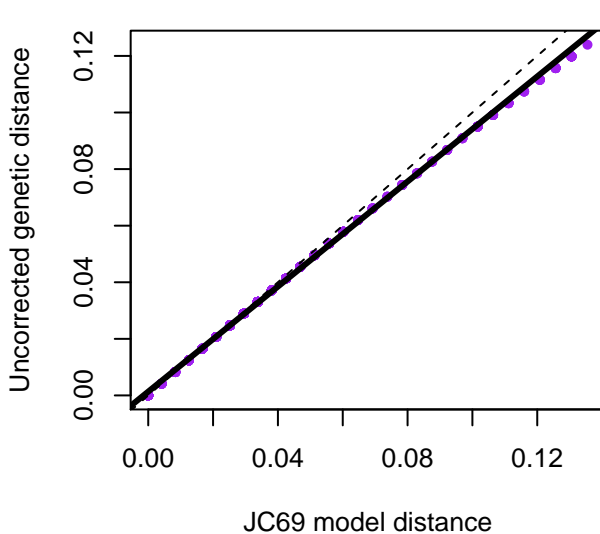

**atpl Saturation (2nd Pos)**

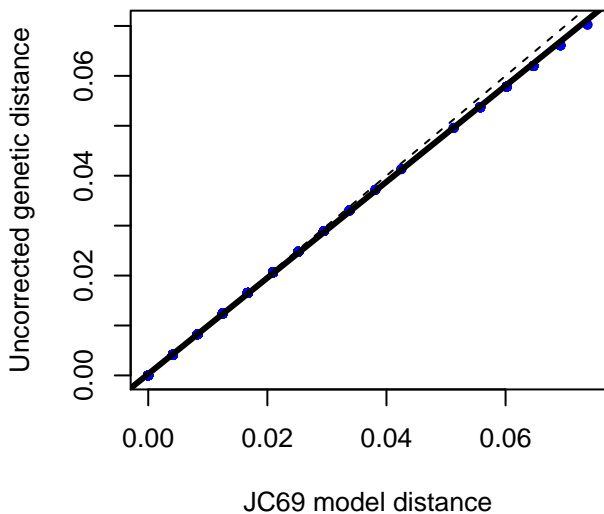

**atpl Saturation (3rd Pos)**

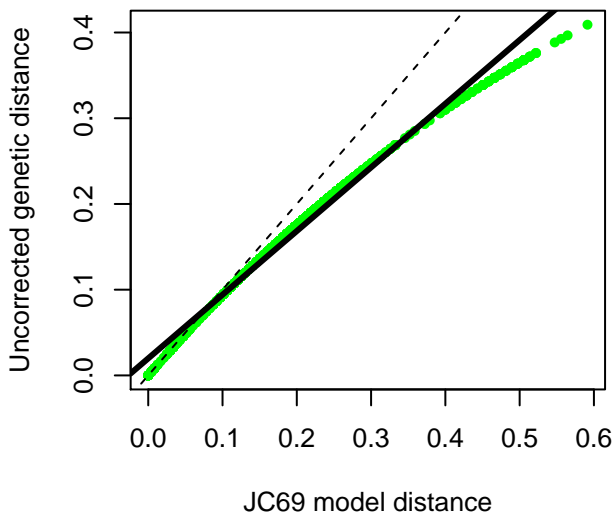

**ccsA Saturation (All Bases)**

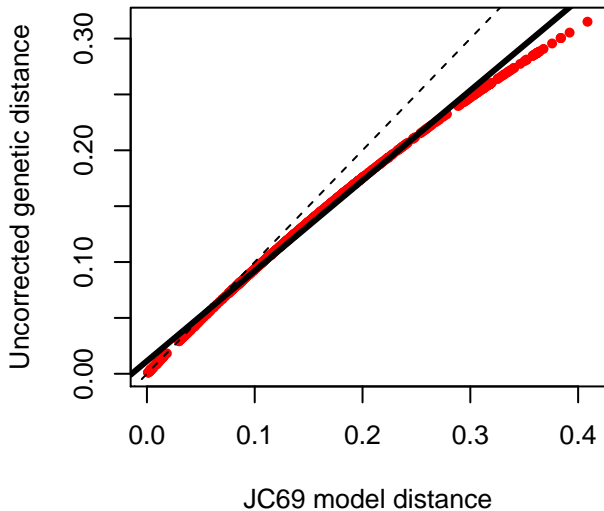

**ccsA Saturation (1st Pos)**

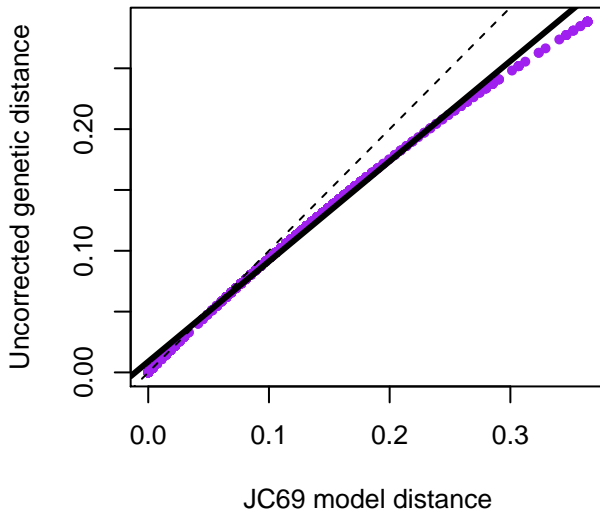

**ccsA Saturation (2nd Pos)**

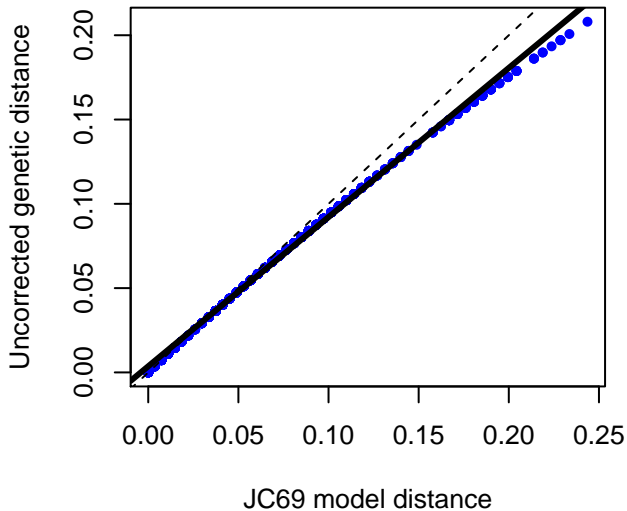

**ccsA Saturation (3rd Pos)**

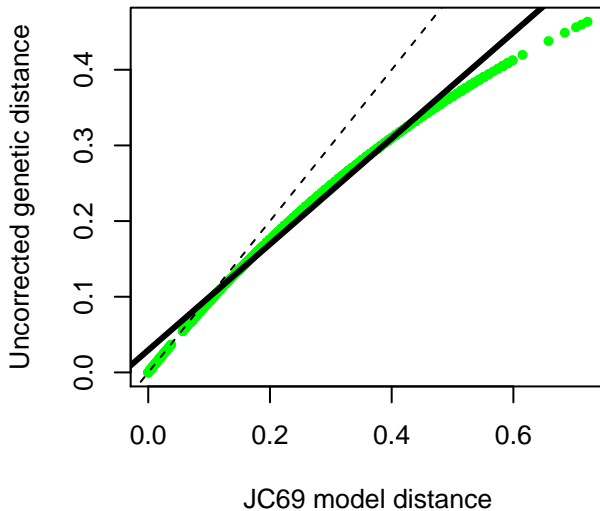



**cemA Saturation (All Bases)**

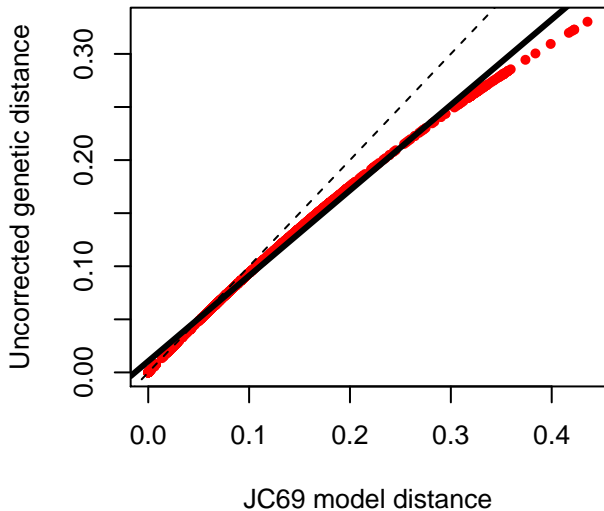

**cemA Saturation (1st Pos)**

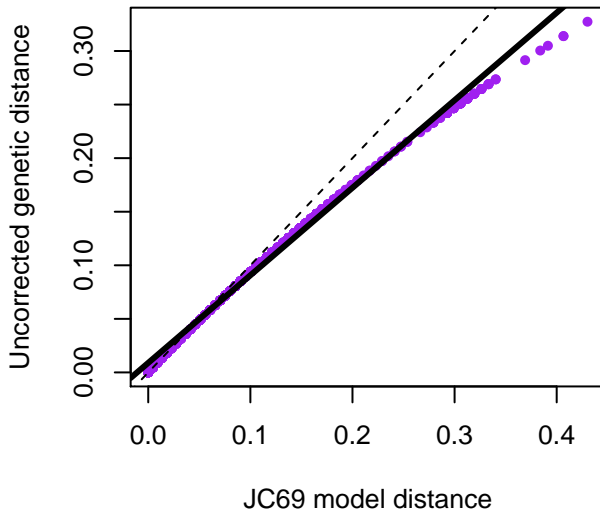

**cemA Saturation (2nd Pos)**

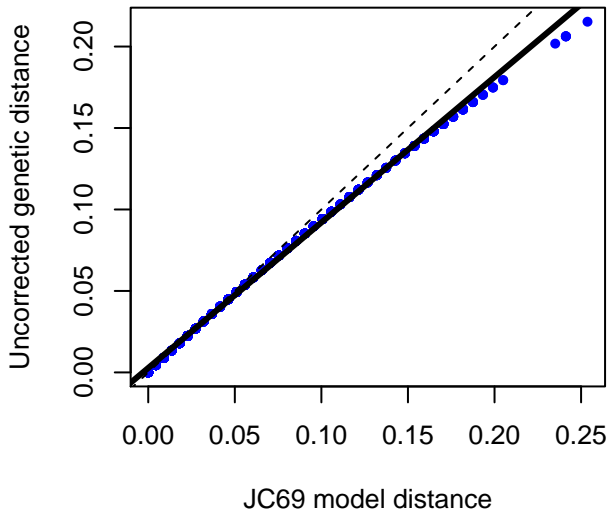

**cemA Saturation (3rd Pos)**

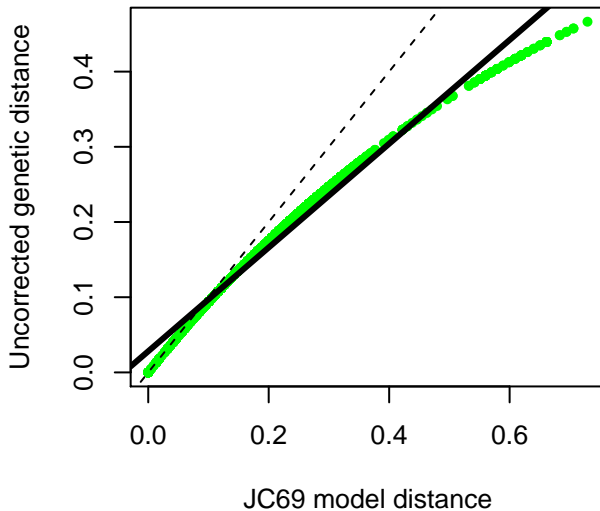

**clpP Saturation (All Bases)**

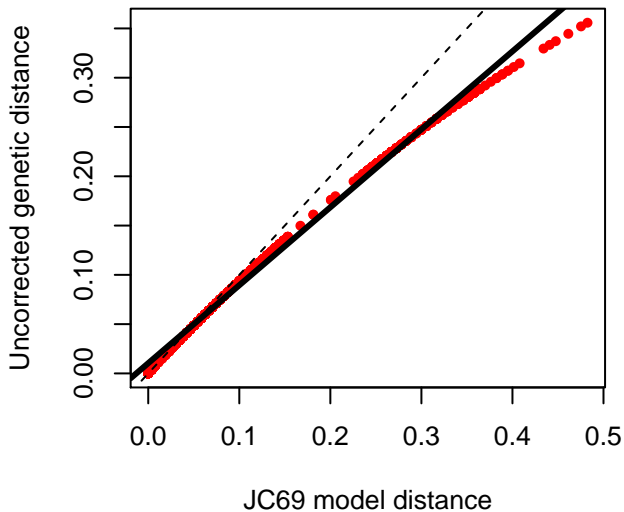

**clpP Saturation (1st Pos)**

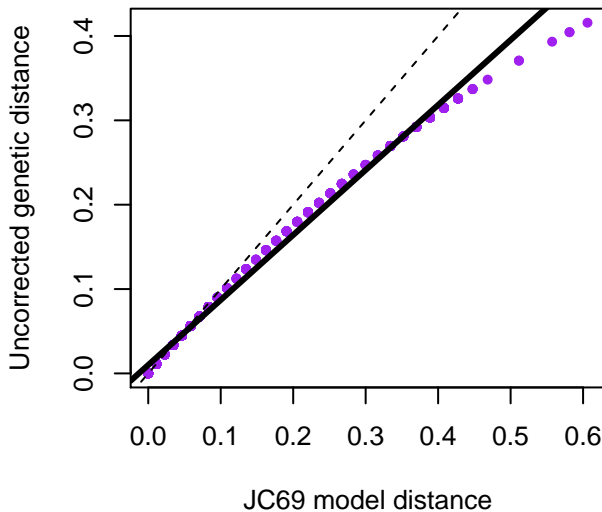

**clpP Saturation (2nd Pos)**

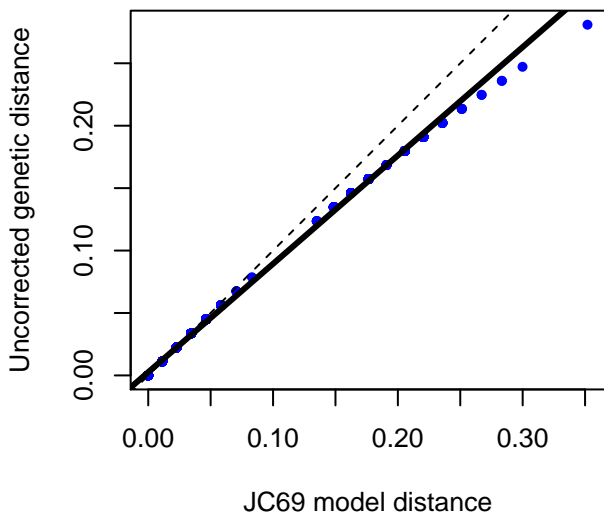

**clpP Saturation (3rd Pos)**

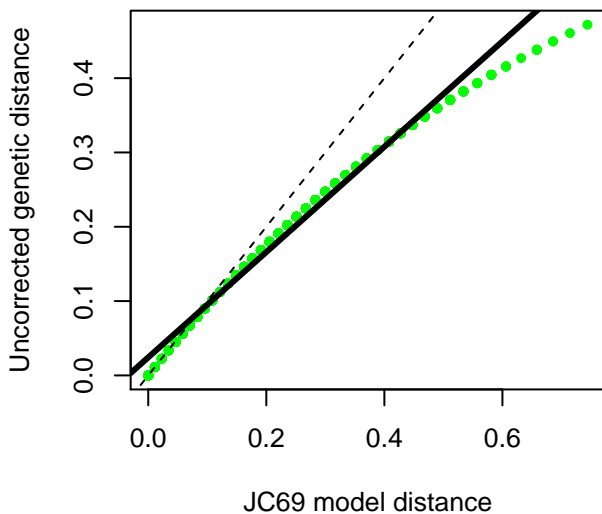

**infA Saturation (All Bases)**

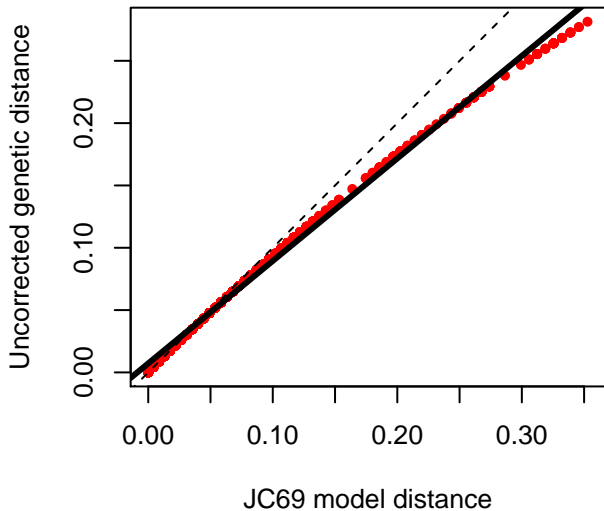

**infA Saturation (1st Pos)**

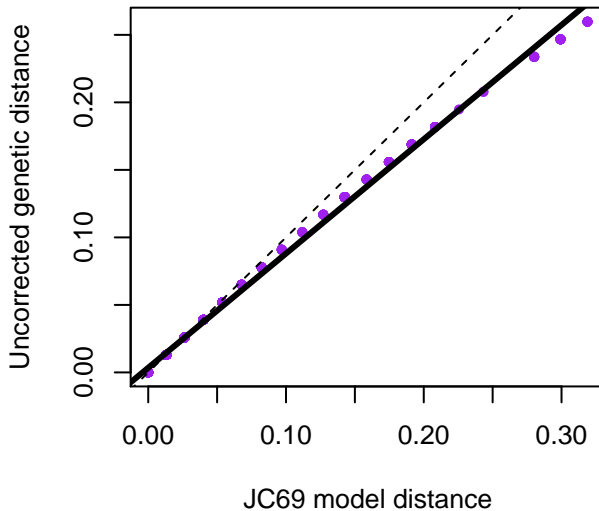

**infA Saturation (2nd Pos)**

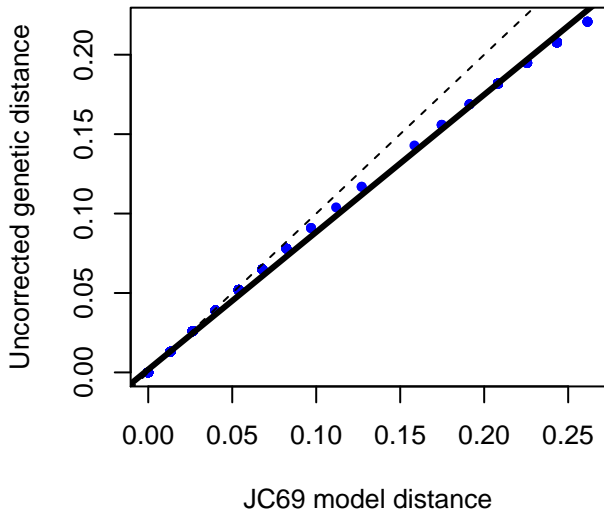

**infA Saturation (3rd Pos)**

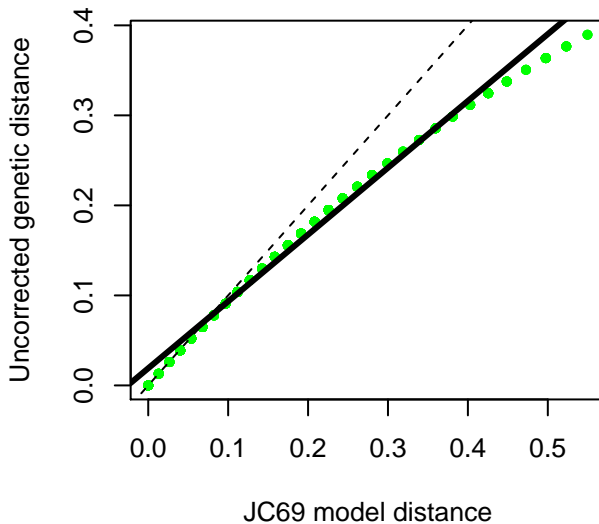

**matK Saturation (All Bases)**

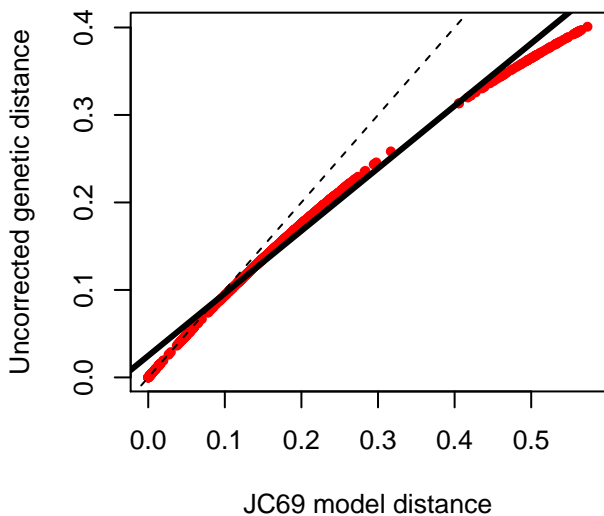

**matK Saturation (1st Pos)**

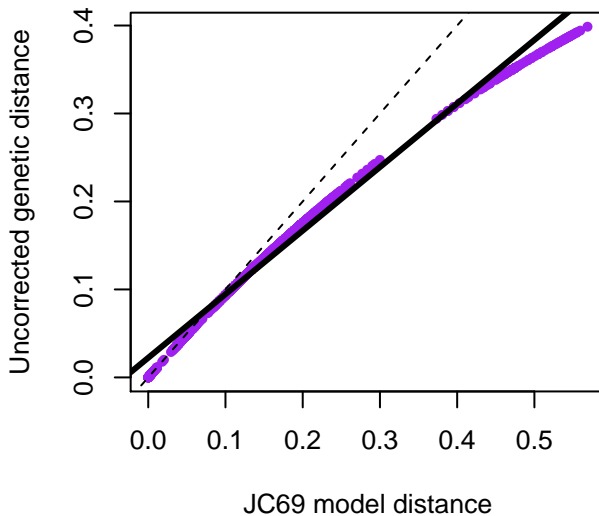

**matK Saturation (2nd Pos)**

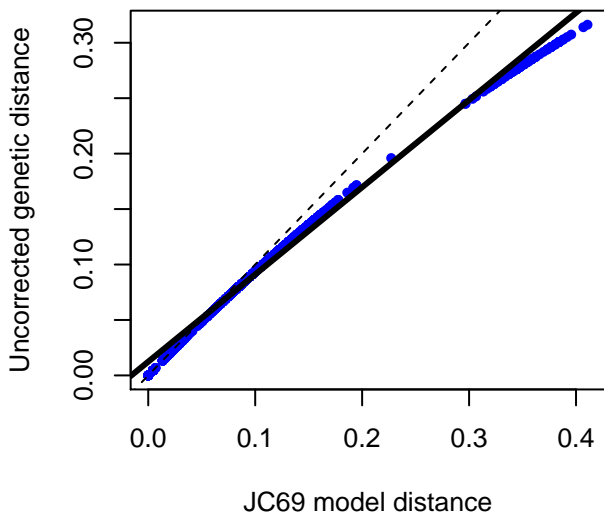

**matK Saturation (3rd Pos)**

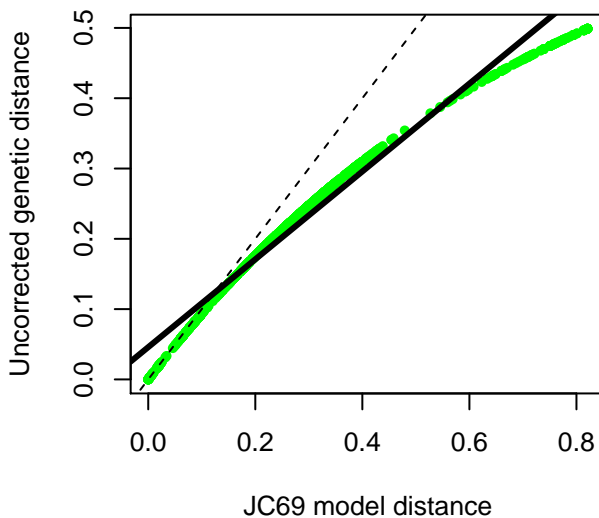

**ndhA Saturation (All Bases)**

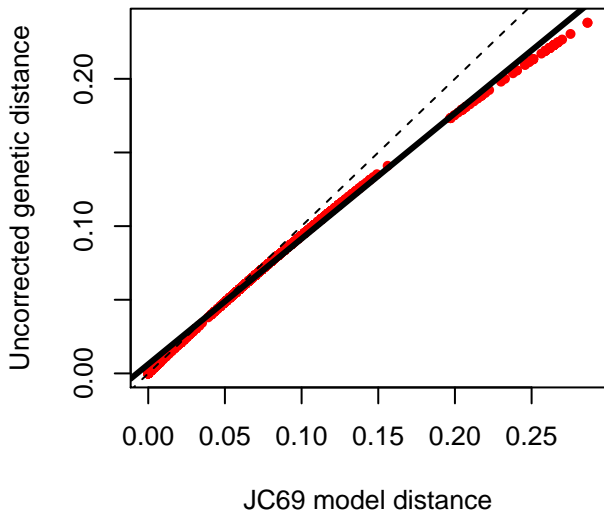

**ndhA Saturation (1st Pos)**

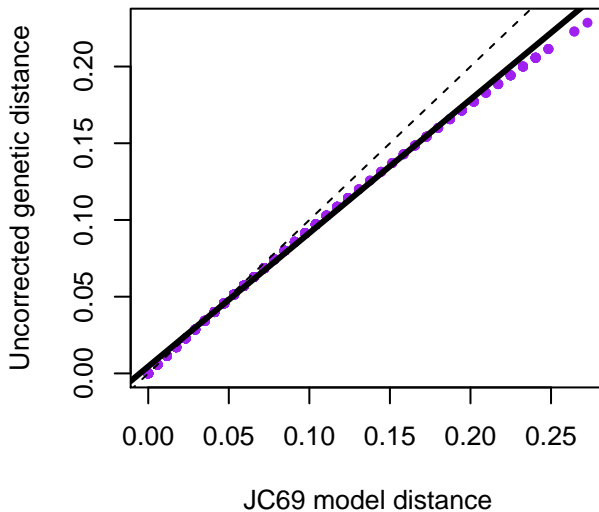

**ndhA Saturation (2nd Pos)**

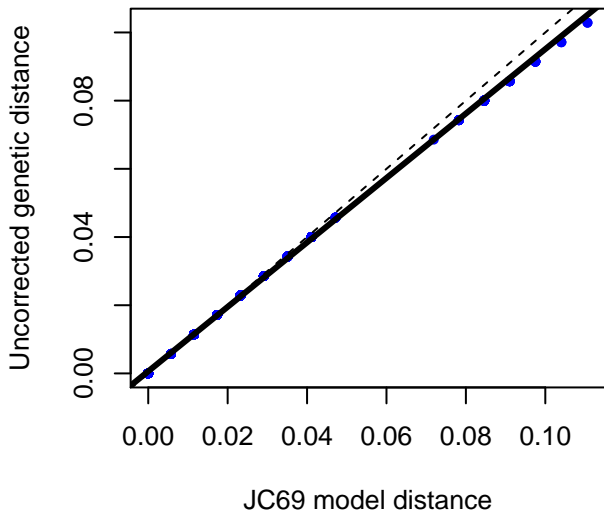

**ndhA Saturation (3rd Pos)**

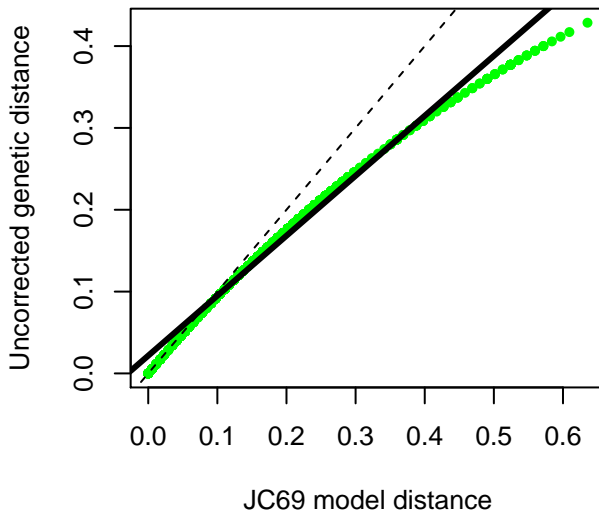

**ndhB Saturation (All Bases)**

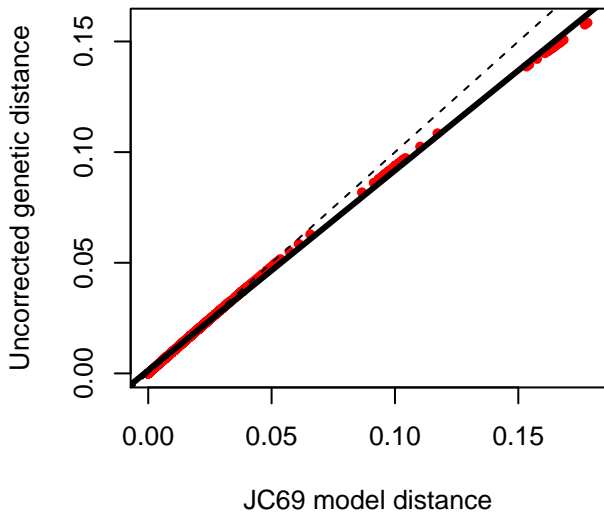

**ndhB Saturation (1st Pos)**

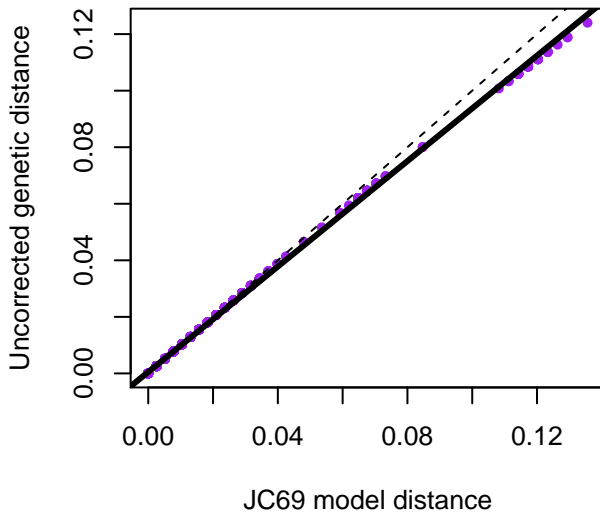

**ndhB Saturation (2nd Pos)**

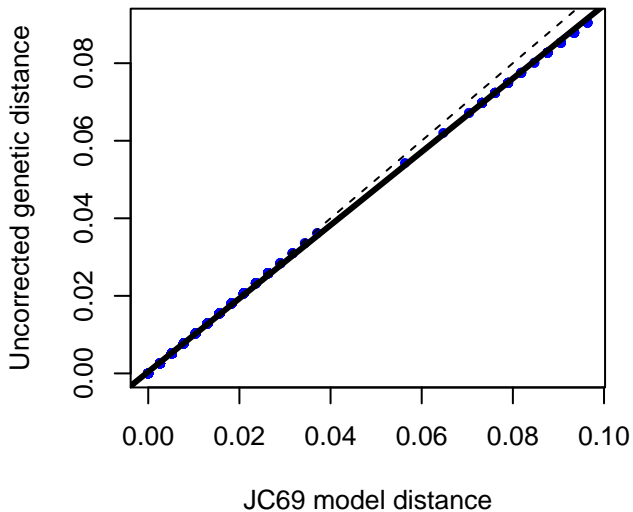

**ndhB Saturation (3rd Pos)**

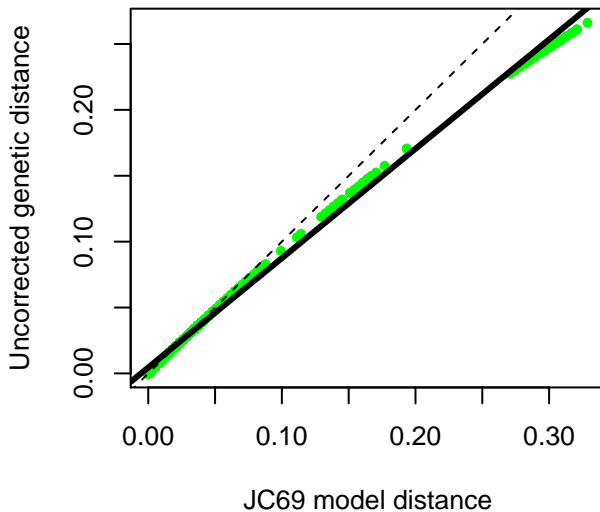

**ndhC Saturation (All Bases)**

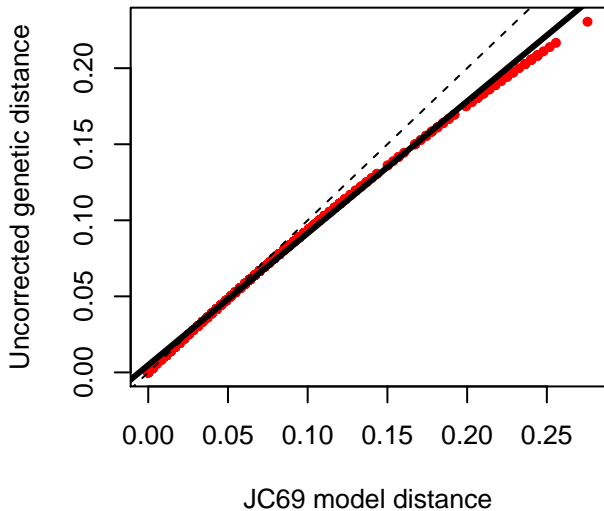

**ndhC Saturation (1st Pos)**

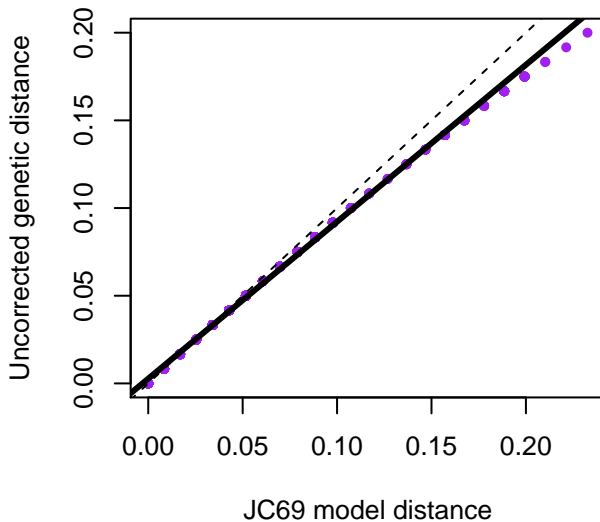

**ndhC Saturation (2nd Pos)**

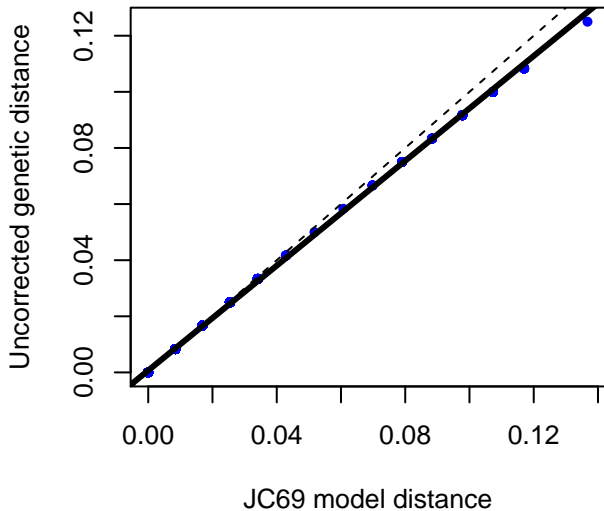

**ndhC Saturation (3rd Pos)**

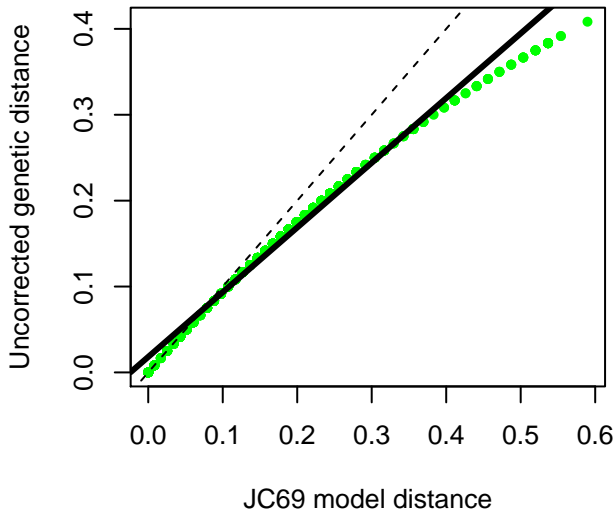

**ndhD Saturation (All Bases)**

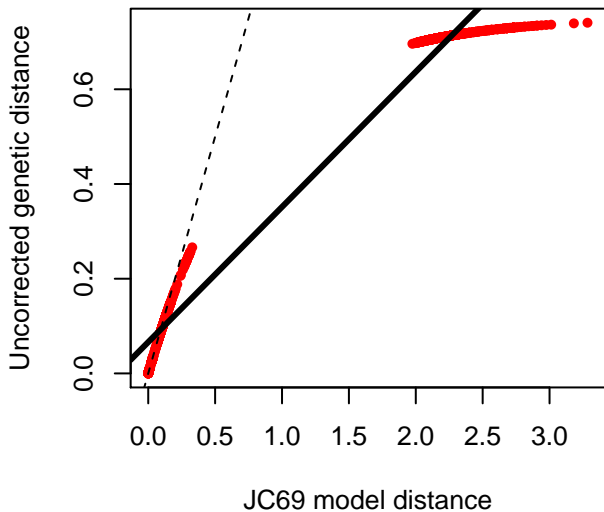

**ndhD Saturation (1st Pos)**

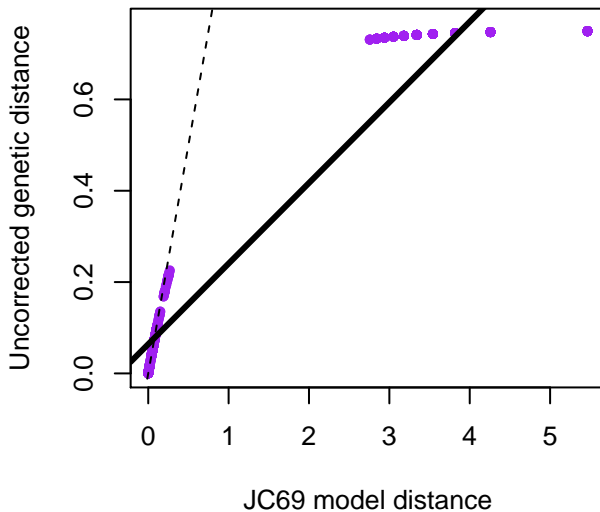

**ndhD Saturation (2nd Pos)**

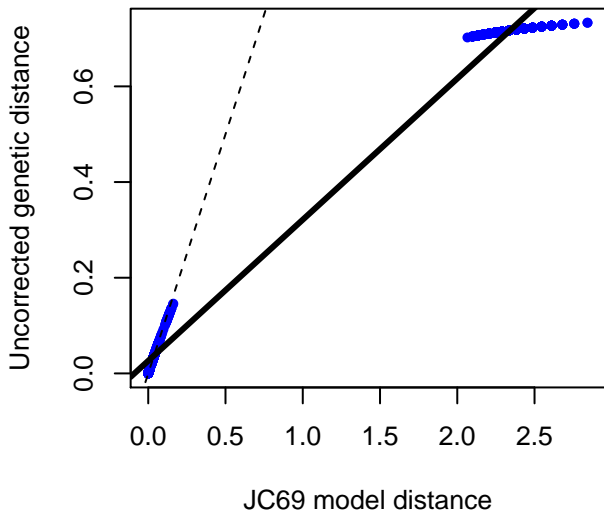

**ndhD Saturation (3rd Pos)**

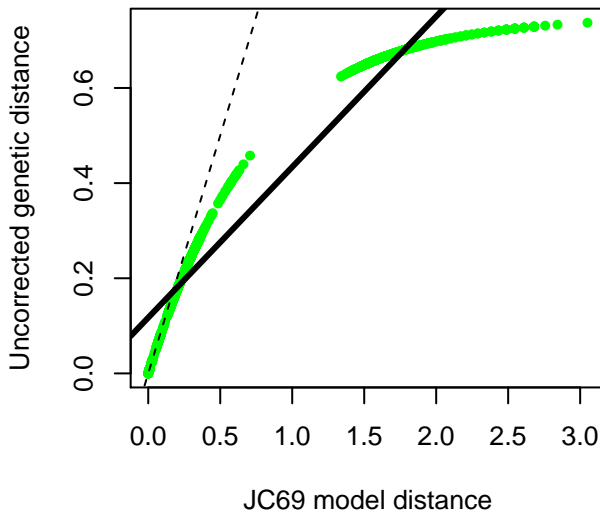



**ndhE Saturation (All Bases)**

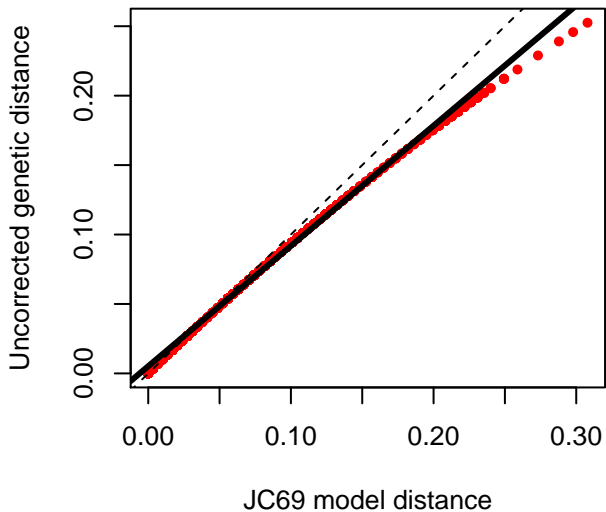

**ndhE Saturation (1st Pos)**

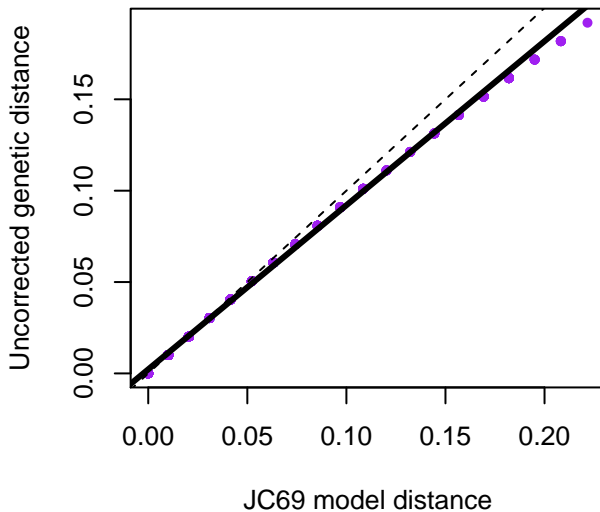

**ndhE Saturation (2nd Pos)**

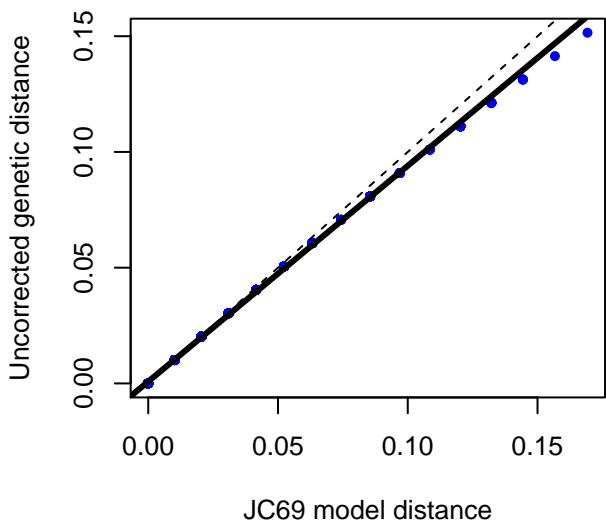

**ndhE Saturation (3rd Pos)**

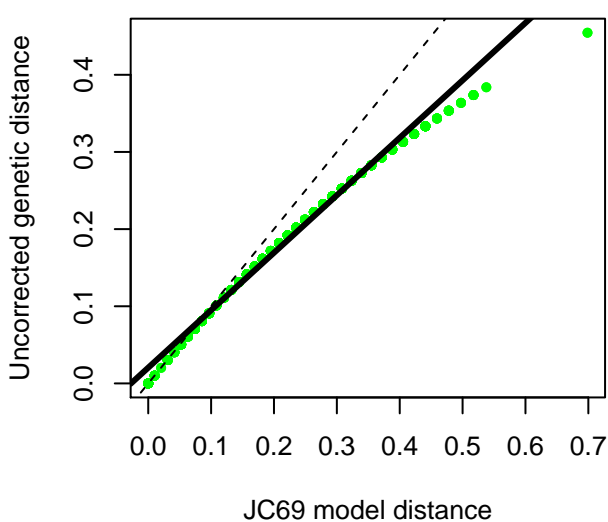

**ndhF Saturation (All Bases)**

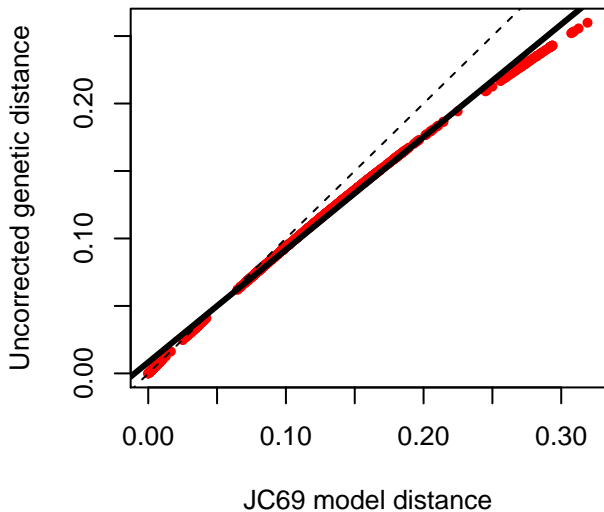

**ndhF Saturation (1st Pos)**

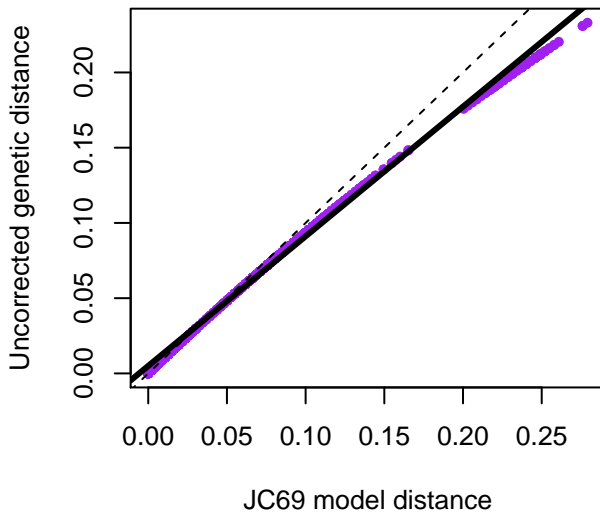

**ndhF Saturation (2nd Pos)**

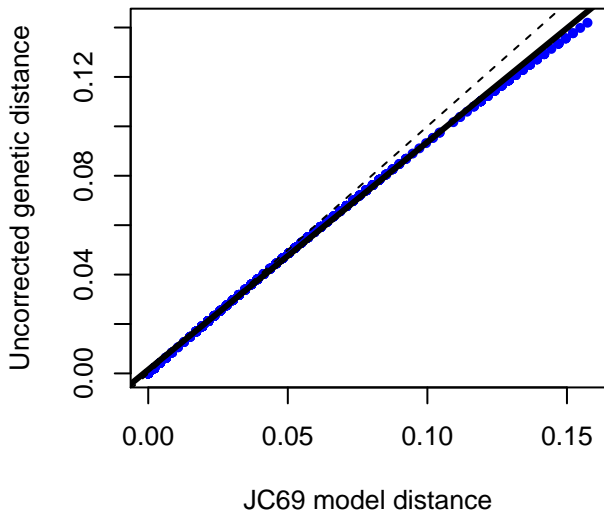

**ndhF Saturation (3rd Pos)**

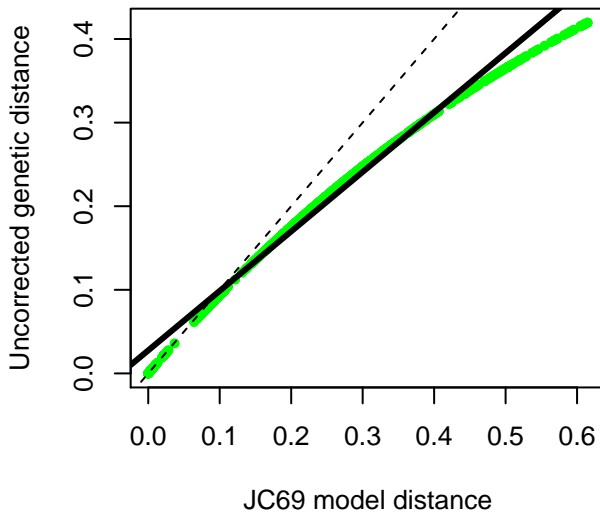

**ndhG Saturation (All Bases)**

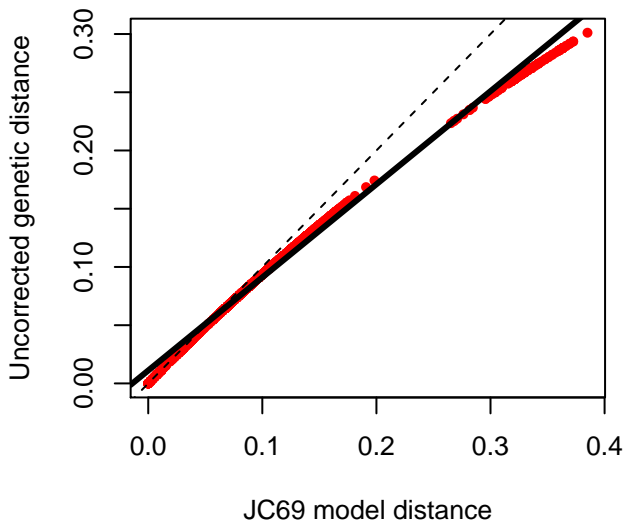

**ndhG Saturation (1st Pos)**

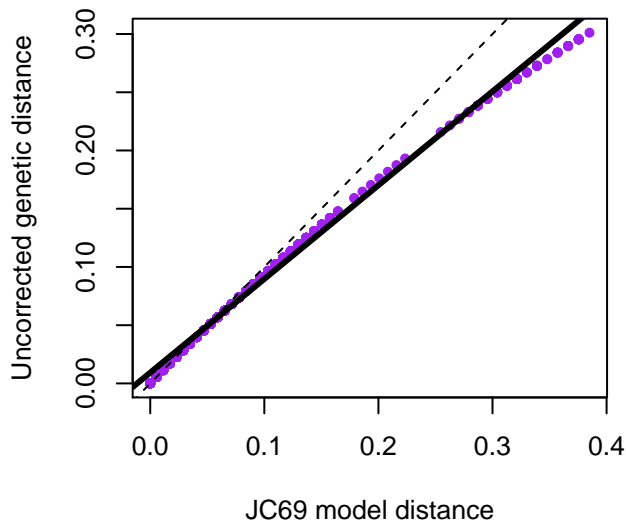

**ndhG Saturation (2nd Pos)**

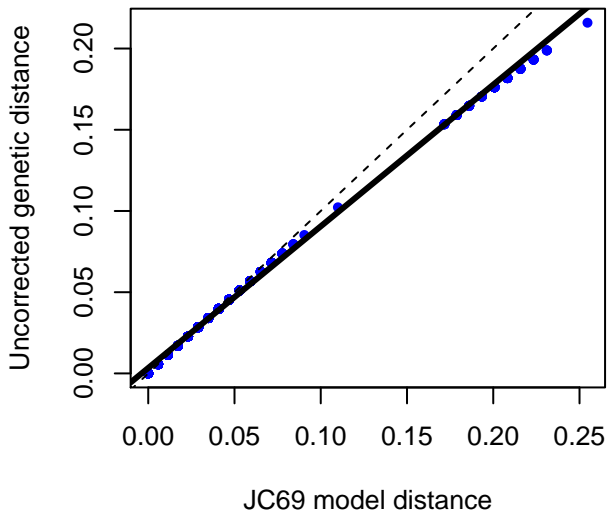

**ndhG Saturation (3rd Pos)**

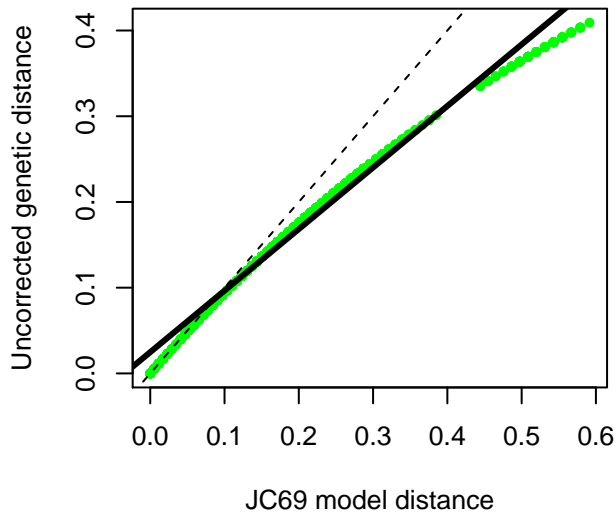

**ndhH Saturation (All Bases)**

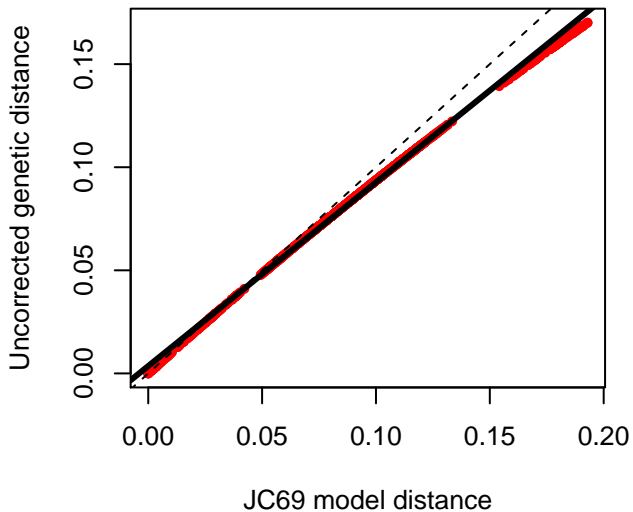

**ndhH Saturation (1st Pos)**

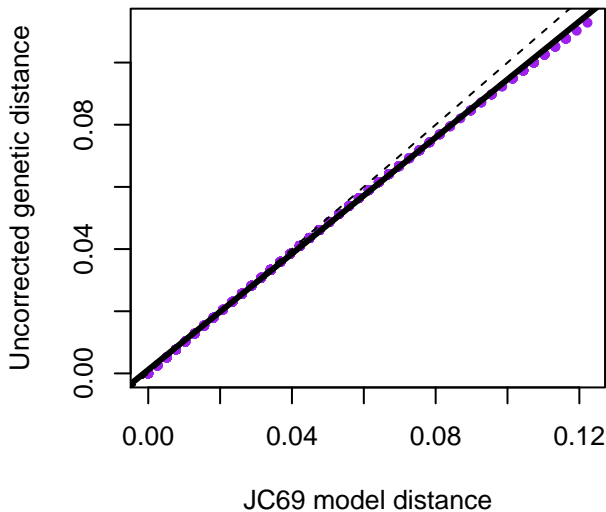

**ndhH Saturation (2nd Pos)**

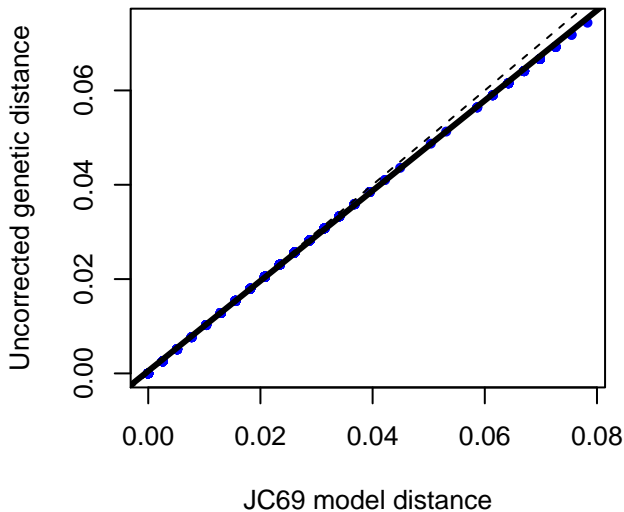

**ndhH Saturation (3rd Pos)**

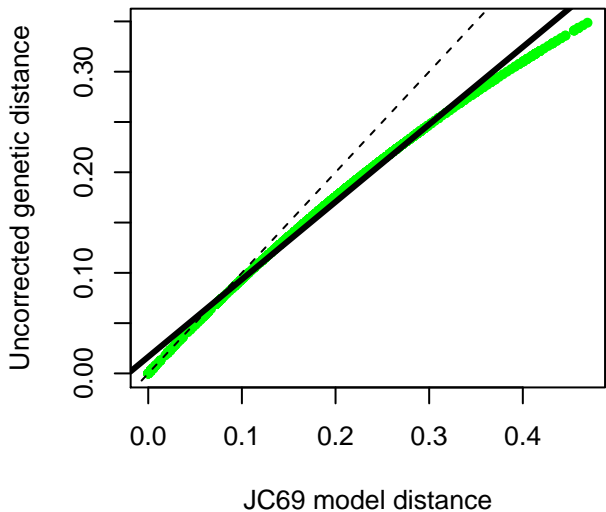

**ndhI Saturation (All Bases)**

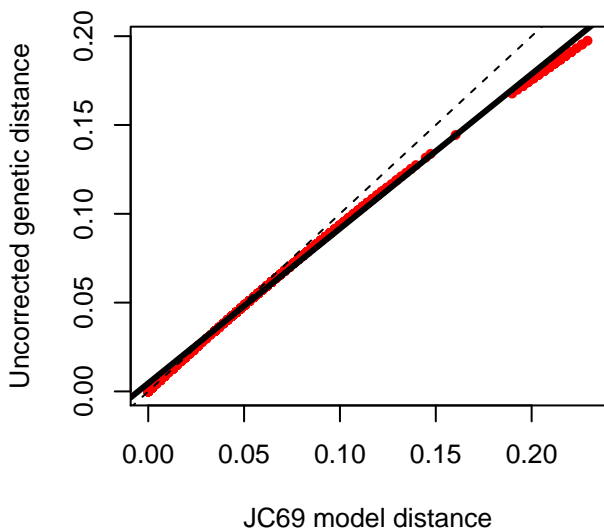

**ndhI Saturation (1st Pos)**

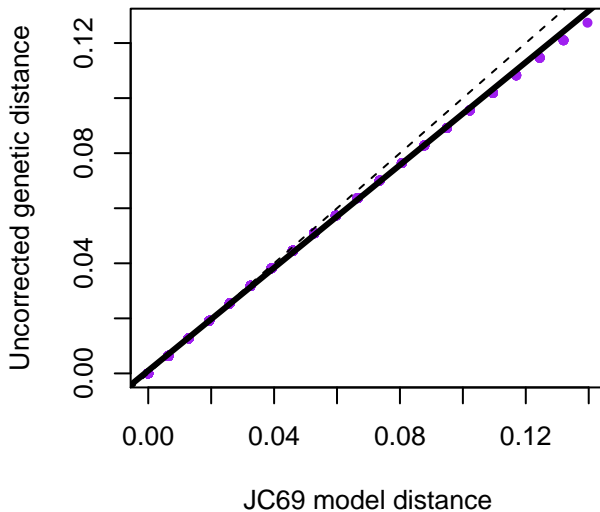

**ndhI Saturation (2nd Pos)**

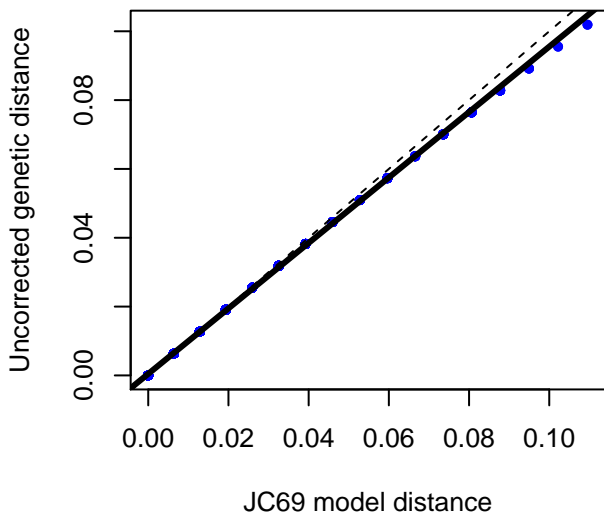

**ndhI Saturation (3rd Pos)**

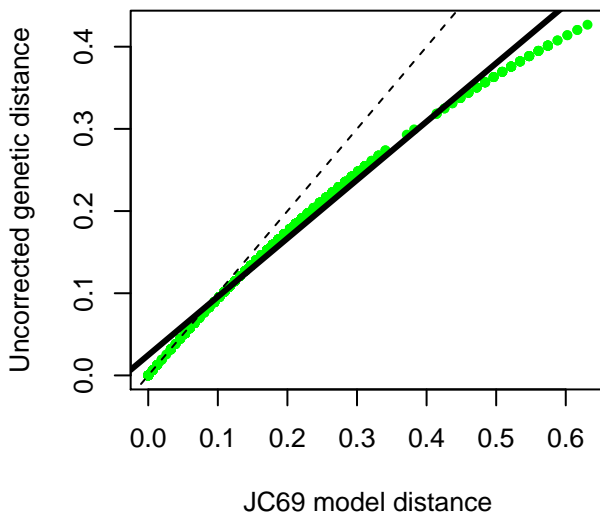

**ndhJ Saturation (All Bases)**

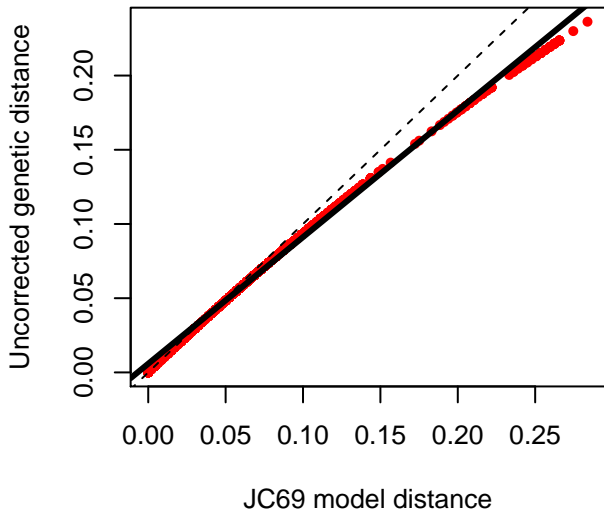

**ndhJ Saturation (1st Pos)**

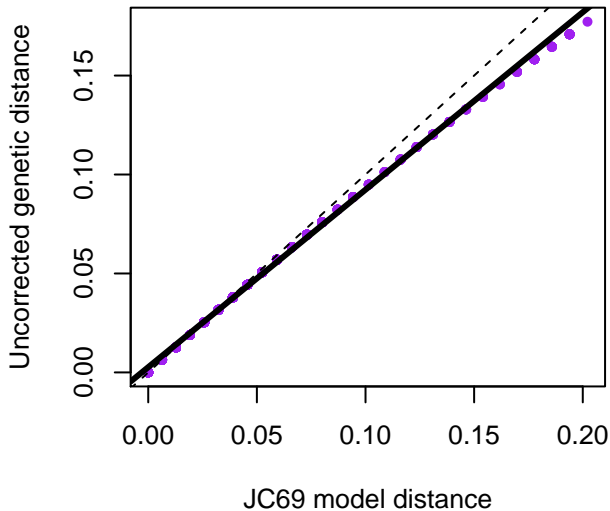

**ndhJ Saturation (2nd Pos)**

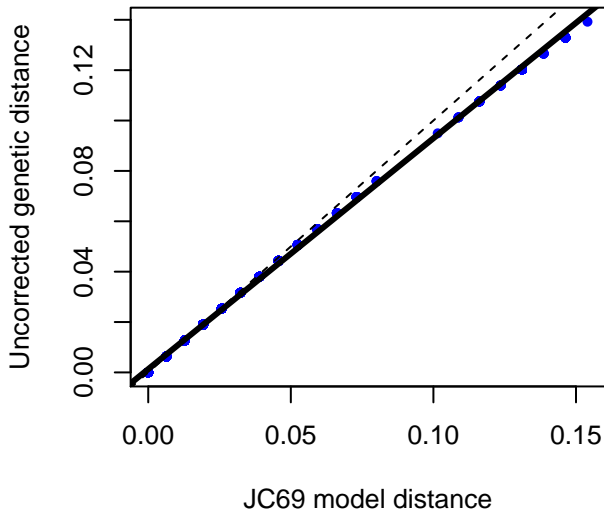

**ndhJ Saturation (3rd Pos)**

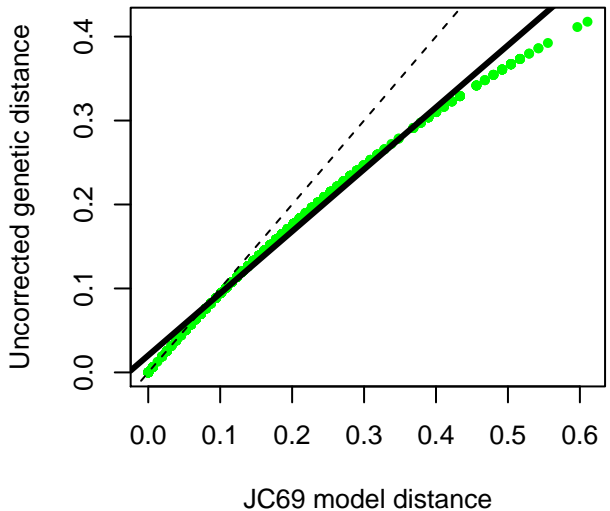

**ndhK Saturation (All Bases)**

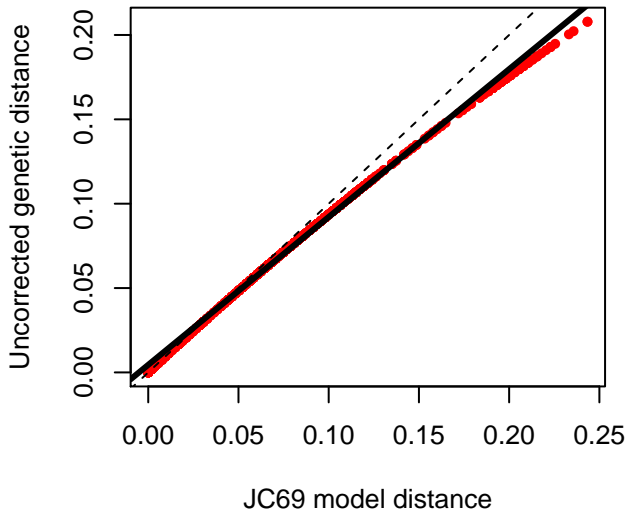

**ndhK Saturation (1st Pos)**

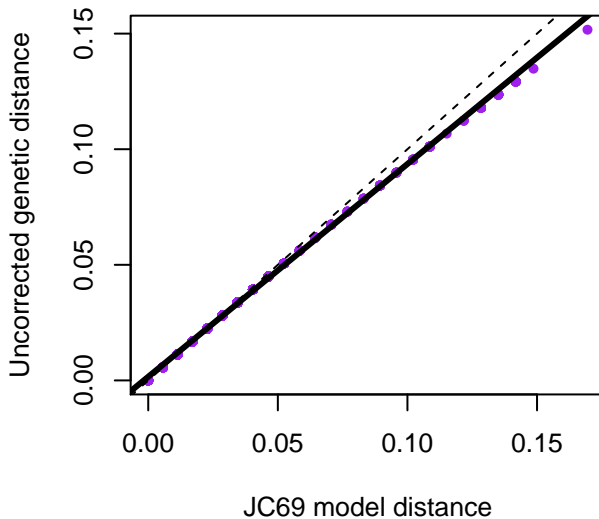

**ndhK Saturation (2nd Pos)**

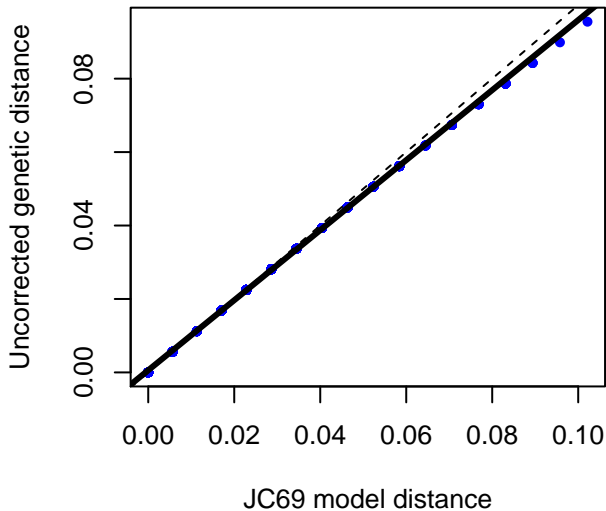

**ndhK Saturation (3rd Pos)**

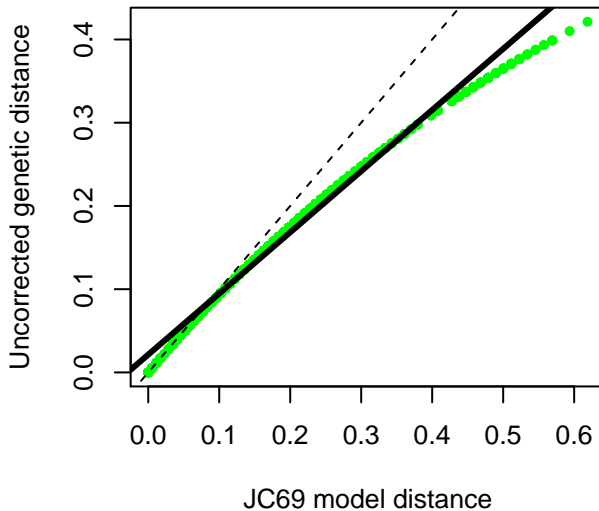

**petA Saturation (All Bases)**

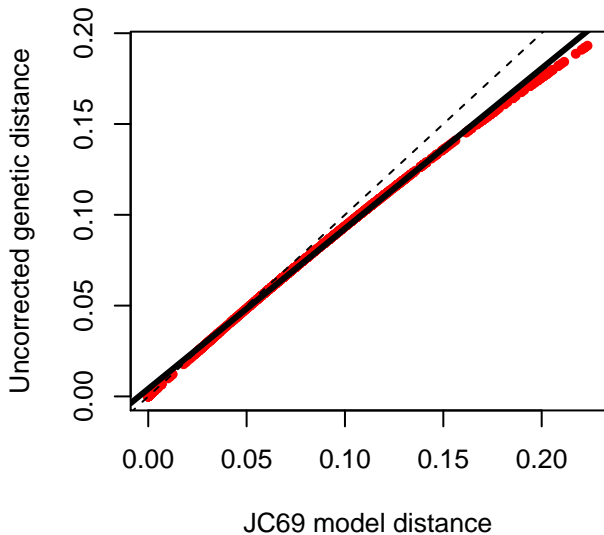

**petA Saturation (1st Pos)**

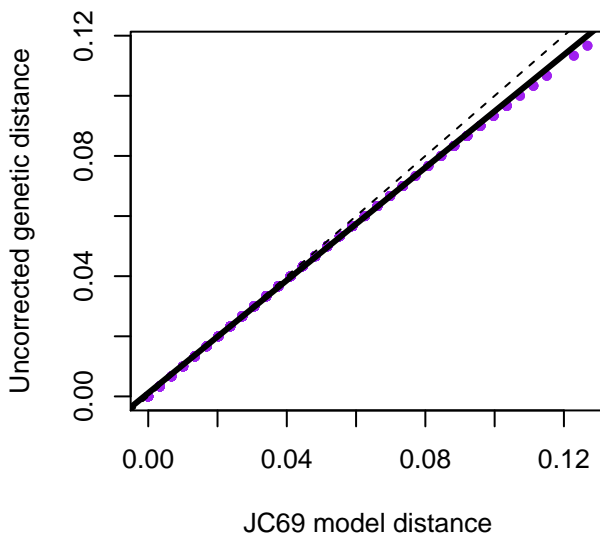

**petA Saturation (2nd Pos)**

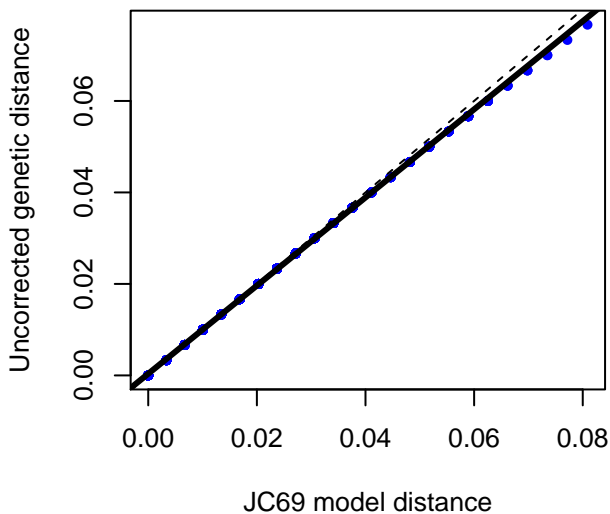

**petA Saturation (3rd Pos)**

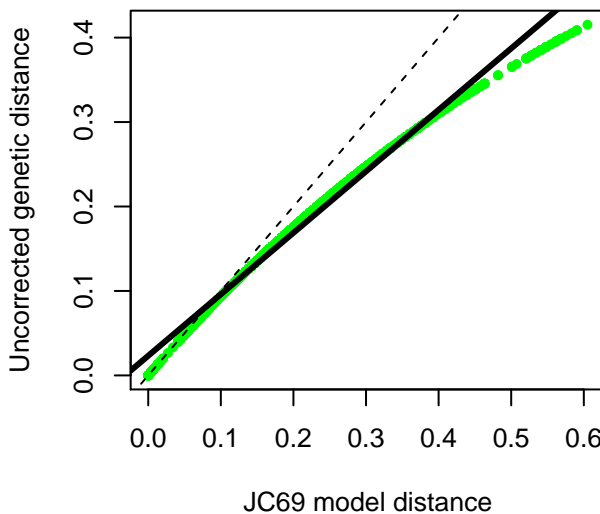



**petB Saturation (All Bases)**

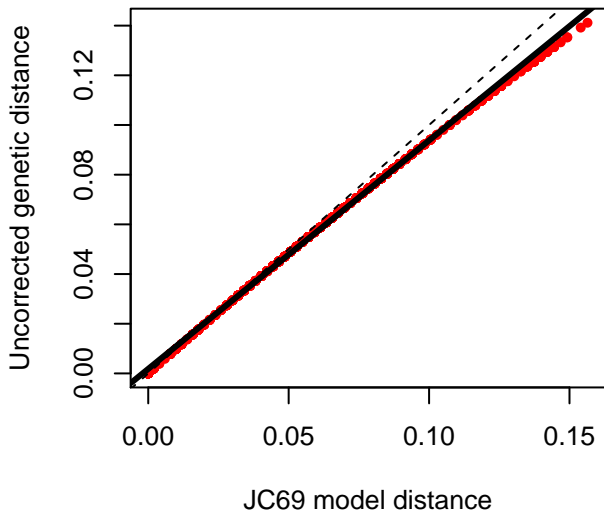

**petB Saturation (1st Pos)**

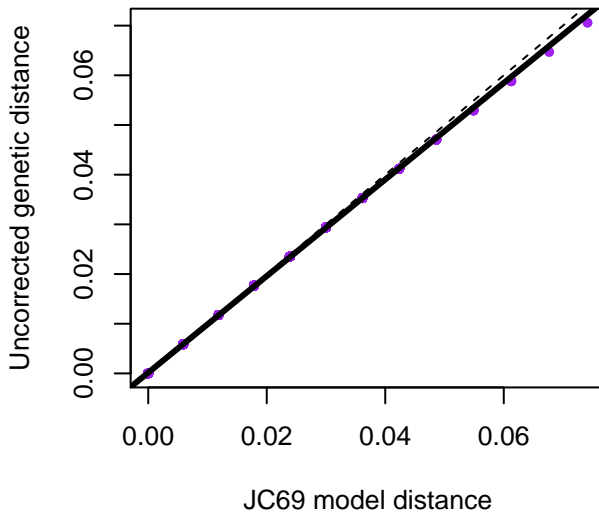

**petB Saturation (2nd Pos)**

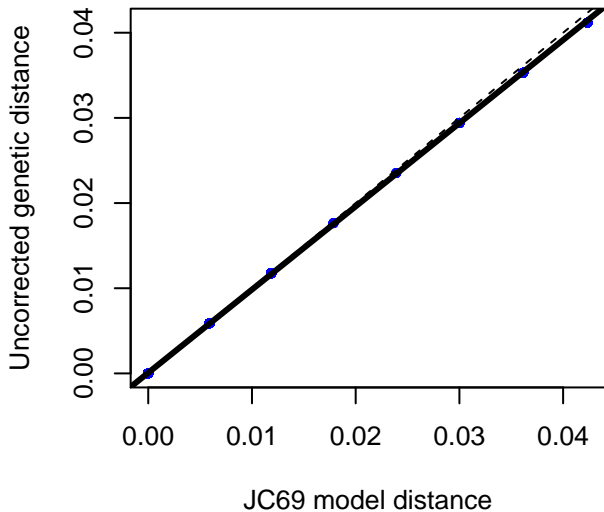

**petB Saturation (3rd Pos)**

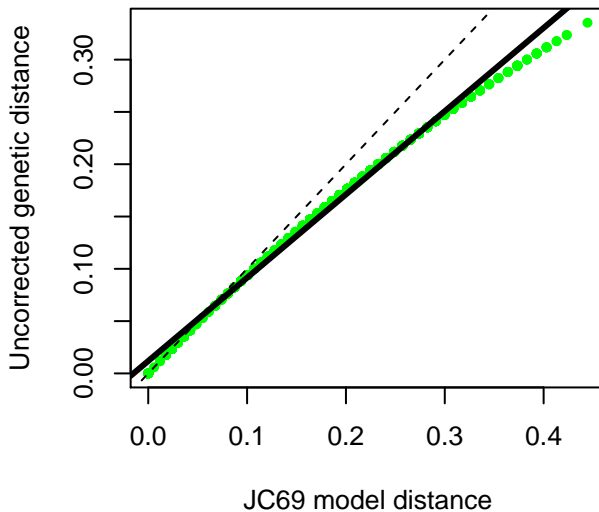

**petD Saturation (All Bases)**

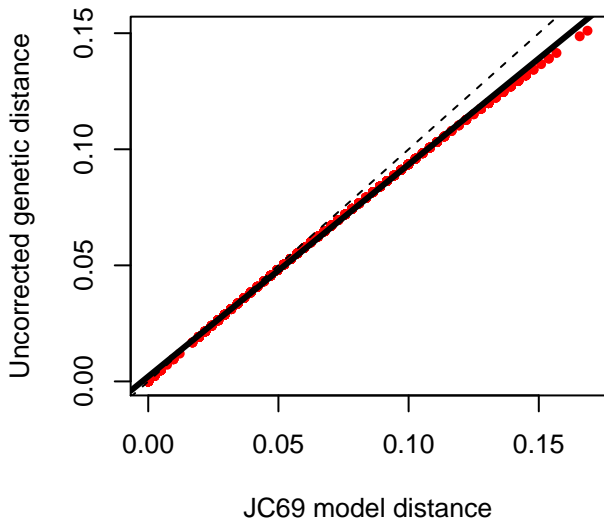

**petD Saturation (1st Pos)**

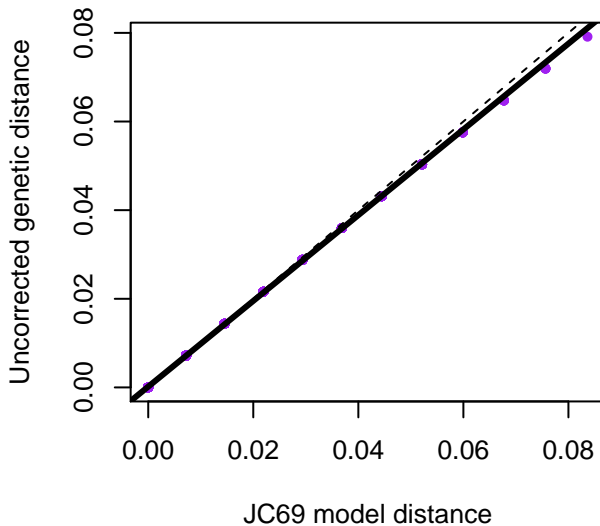

**petD Saturation (2nd Pos)**

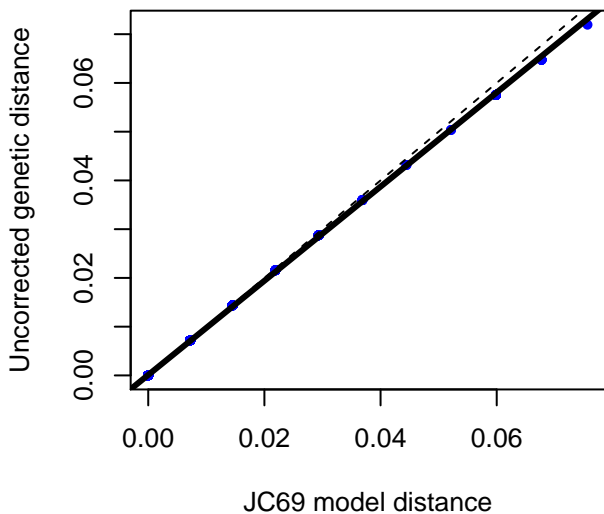

**petD Saturation (3rd Pos)**

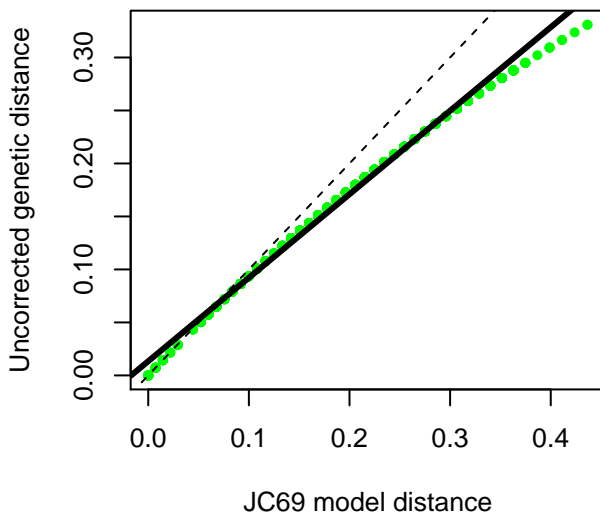

**petG Saturation (All Bases)**

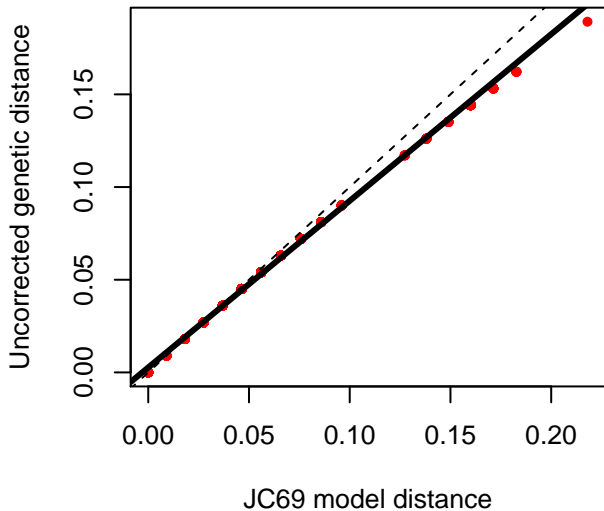

**petG Saturation (1st Pos)**

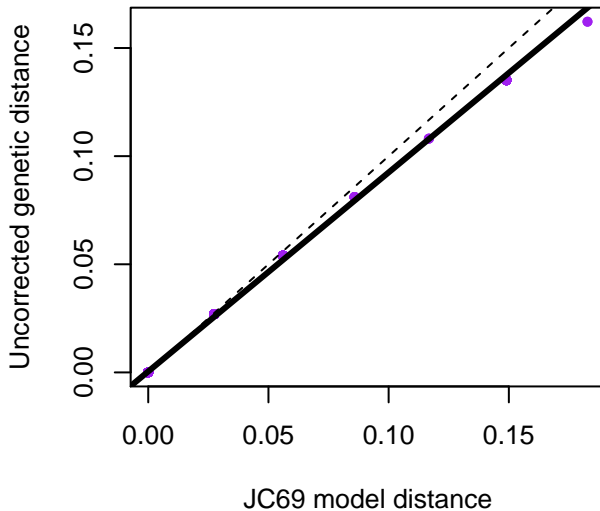

**petG Saturation (2nd Pos)**

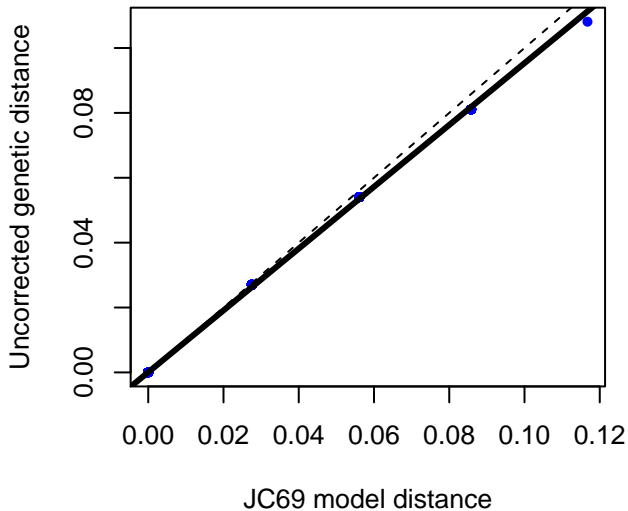

**petG Saturation (3rd Pos)**

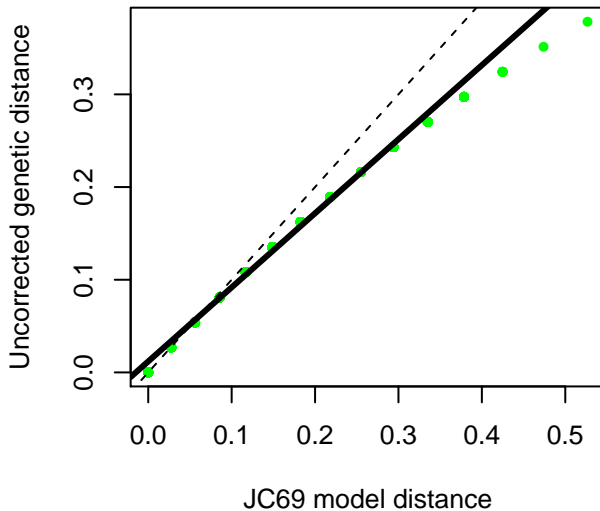

**petL Saturation (All Bases)**

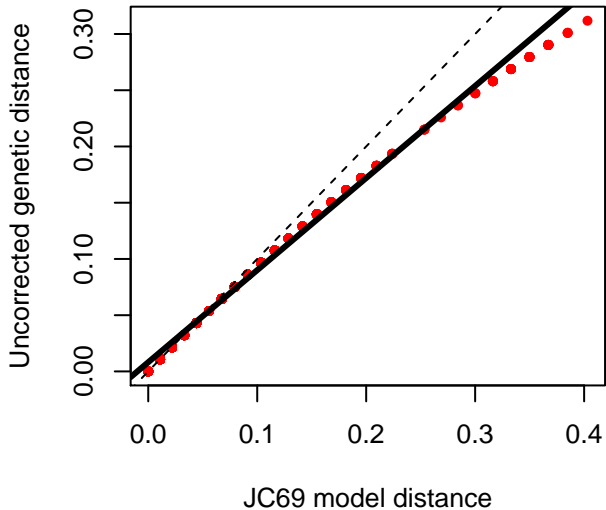

**petL Saturation (1st Pos)**

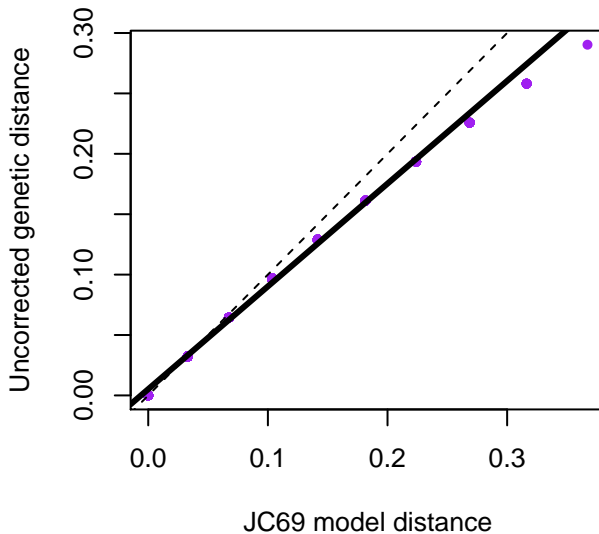

**petL Saturation (2nd Pos)**

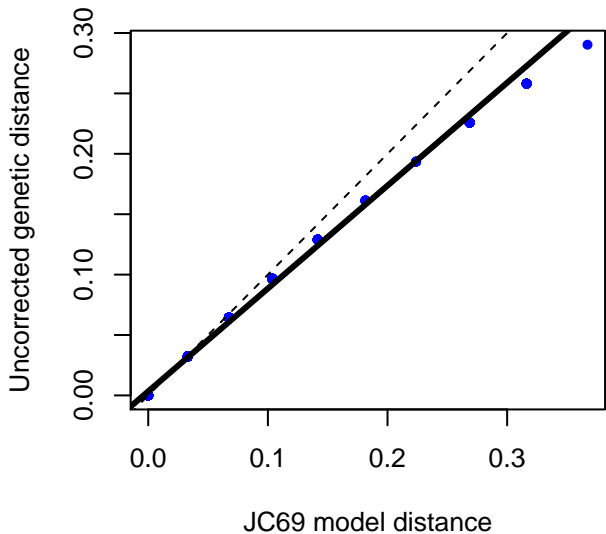

**petL Saturation (3rd Pos)**

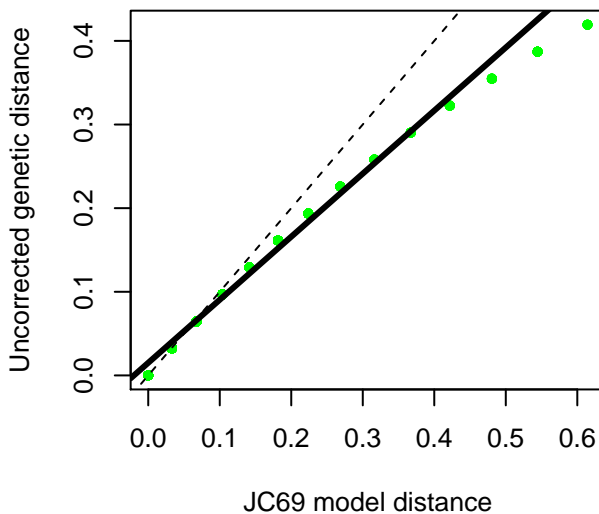

**petN Saturation (All Bases)**

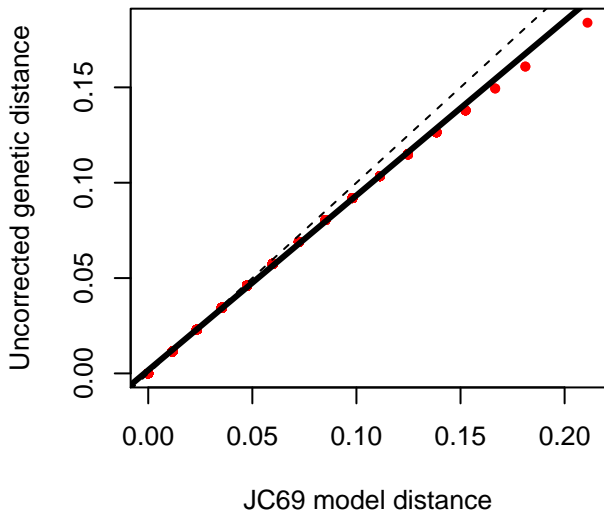

**petN Saturation (1st Pos)**

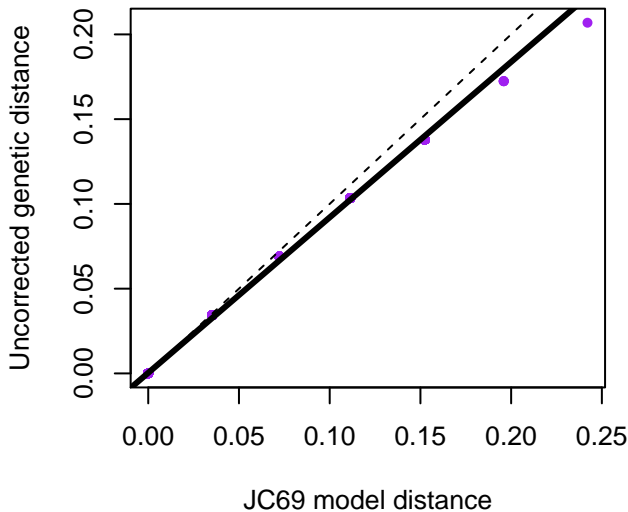

**petN Saturation (2nd Pos)**

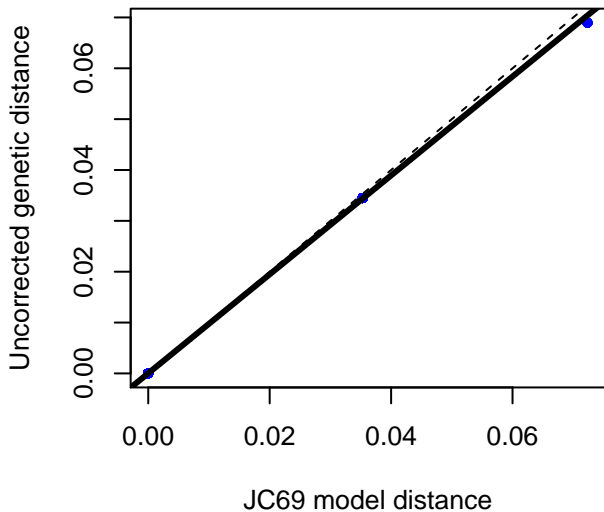

**petN Saturation (3rd Pos)**

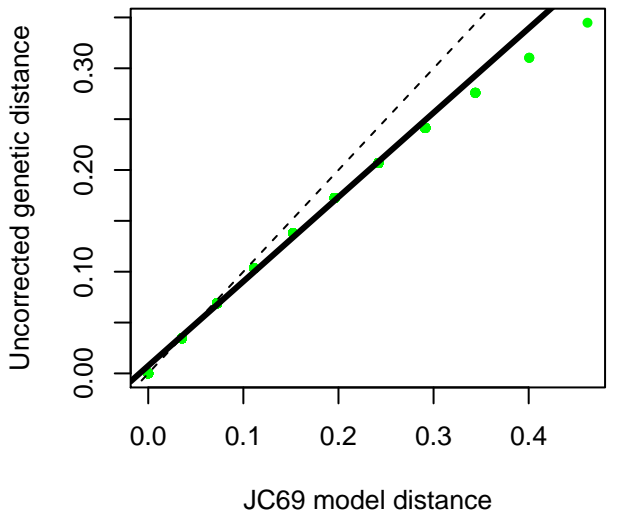

**psaA Saturation (All Bases)**

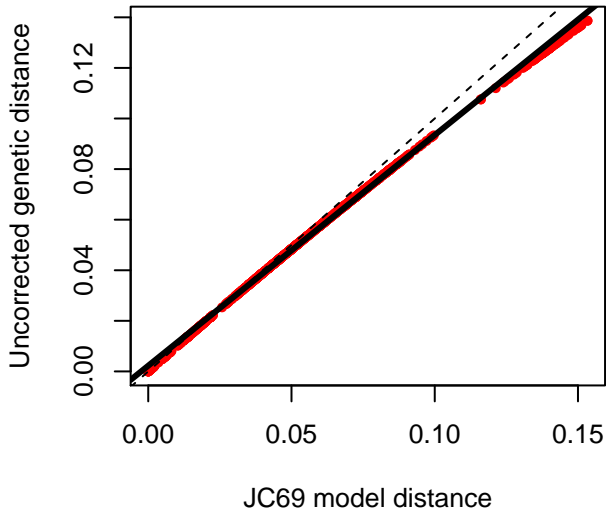

**psaA Saturation (1st Pos)**

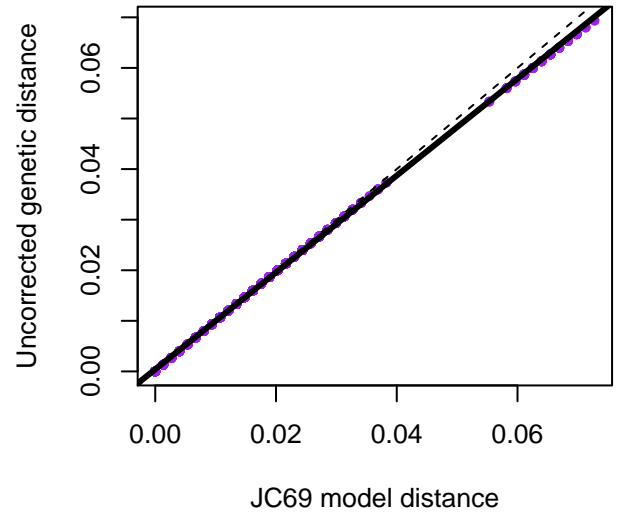

**psaA Saturation (2nd Pos)**

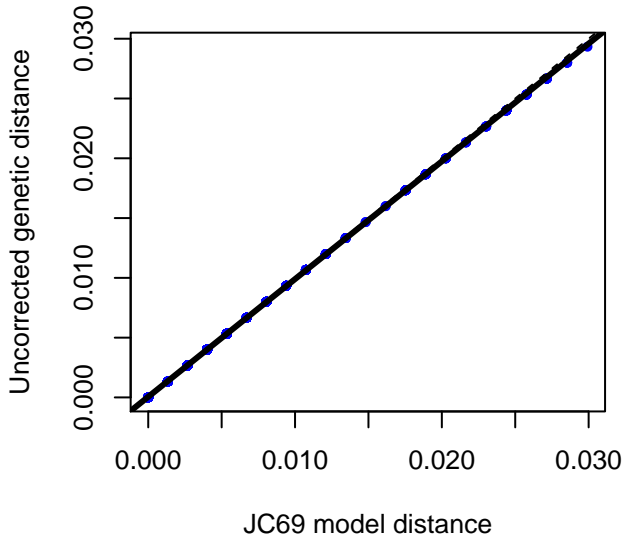

**psaA Saturation (3rd Pos)**

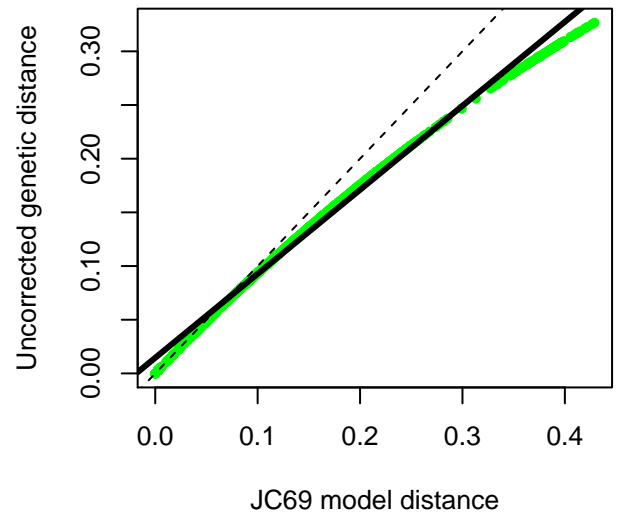

**psaB Saturation (All Bases)**

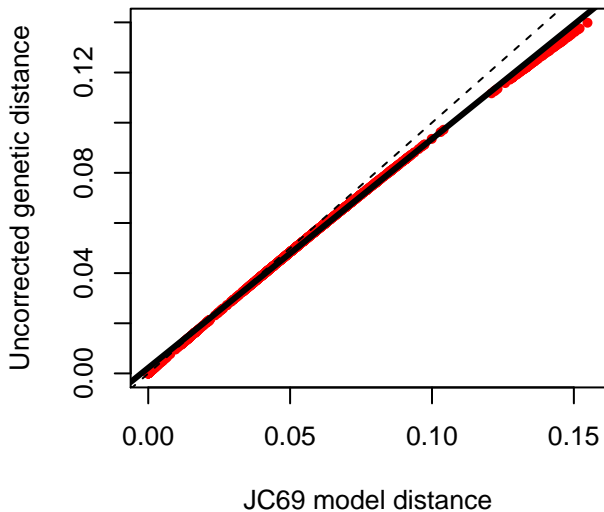

**psaB Saturation (1st Pos)**

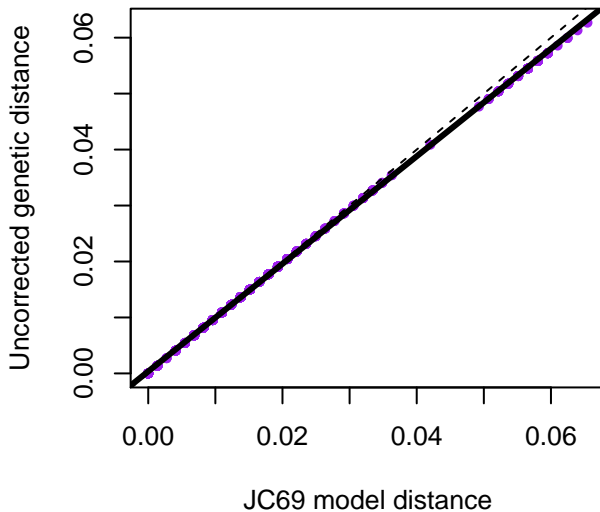

**psaB Saturation (2nd Pos)**

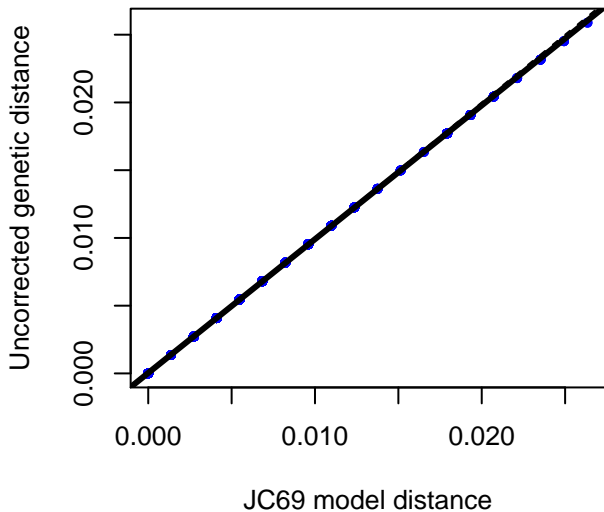

**psaB Saturation (3rd Pos)**

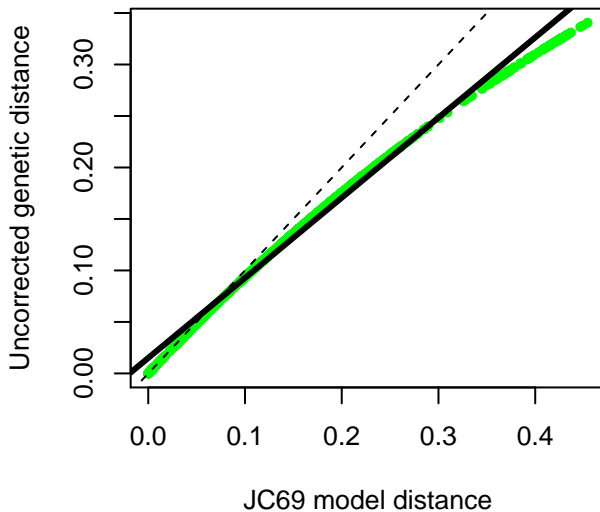

**psaC Saturation (All Bases)**

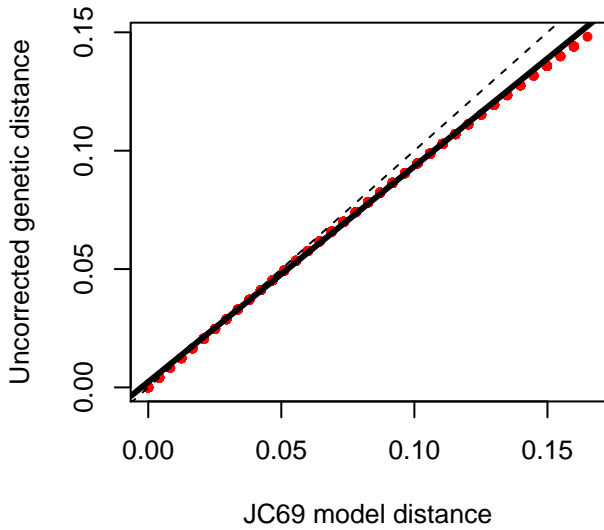

**psaC Saturation (1st Pos)**

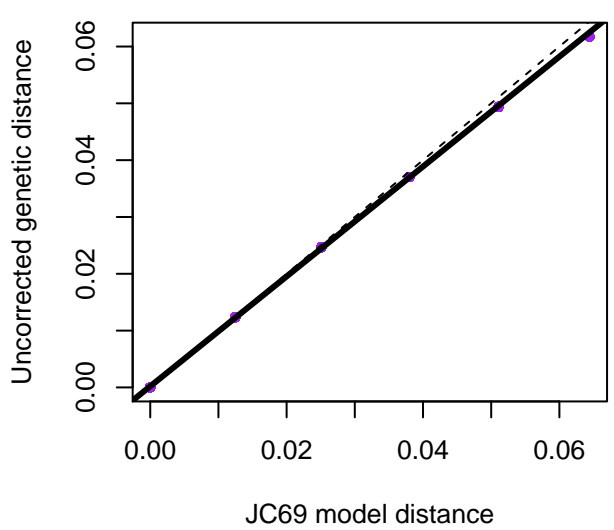

**psaC Saturation (2nd Pos)**

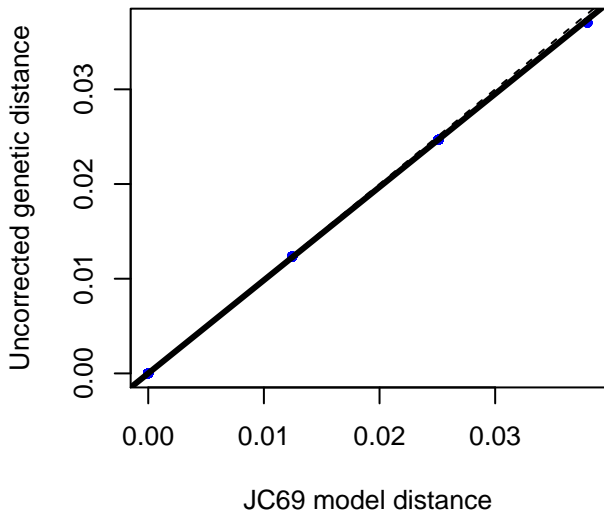

**psaC Saturation (3rd Pos)**

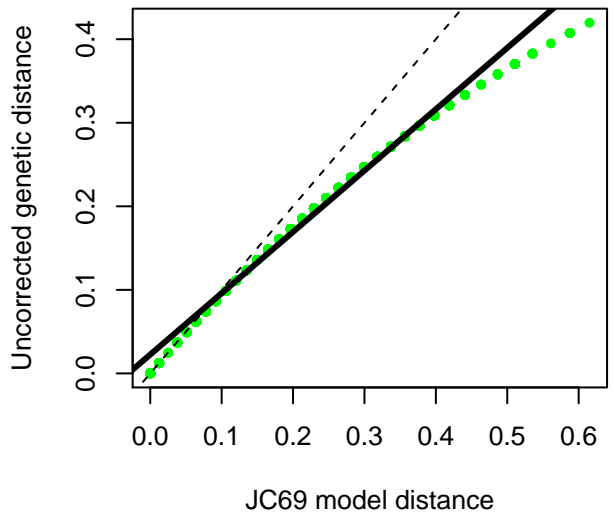



**psal Saturation (All Bases)**

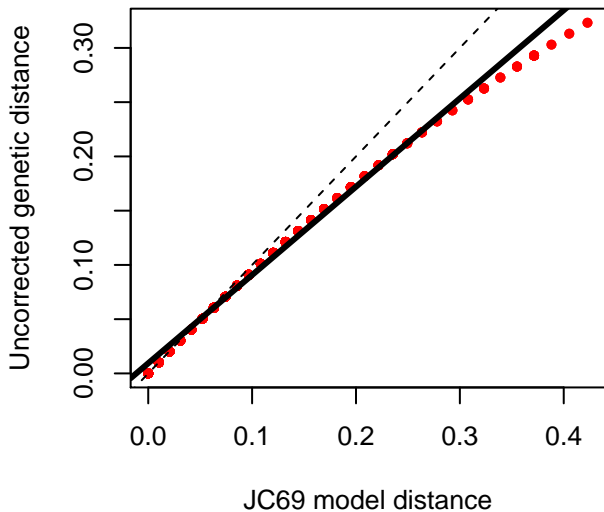

**psal Saturation (1st Pos)**

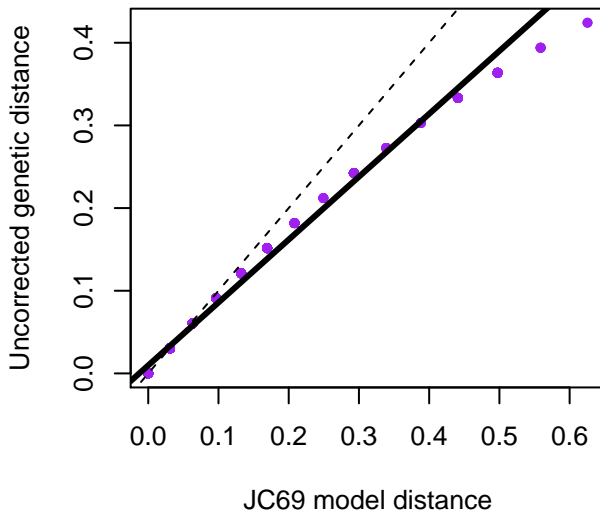

**psal Saturation (2nd Pos)**

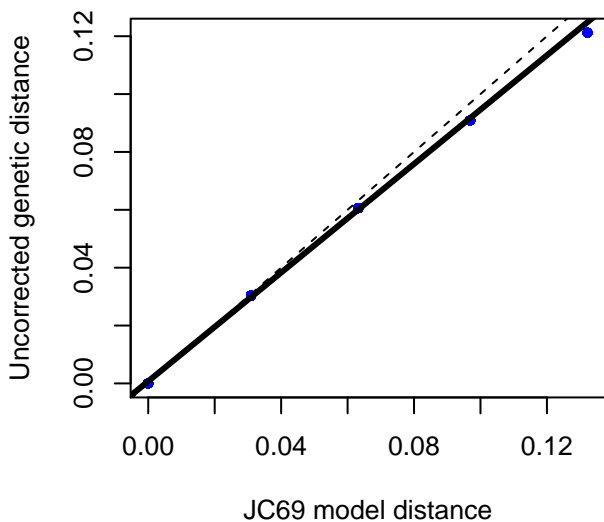

**psal Saturation (3rd Pos)**

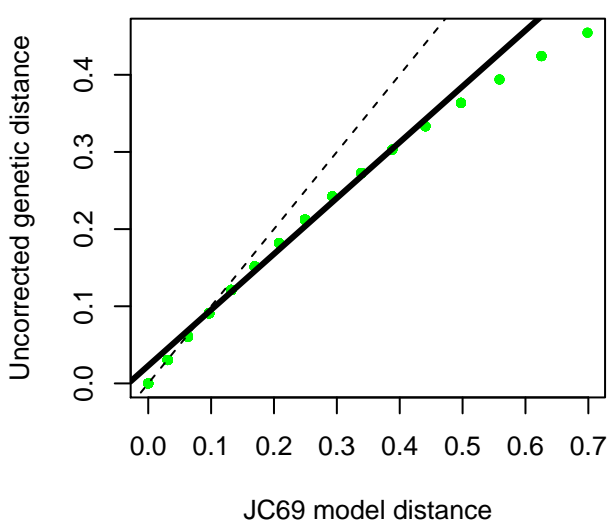

**psaJ Saturation (All Bases)**

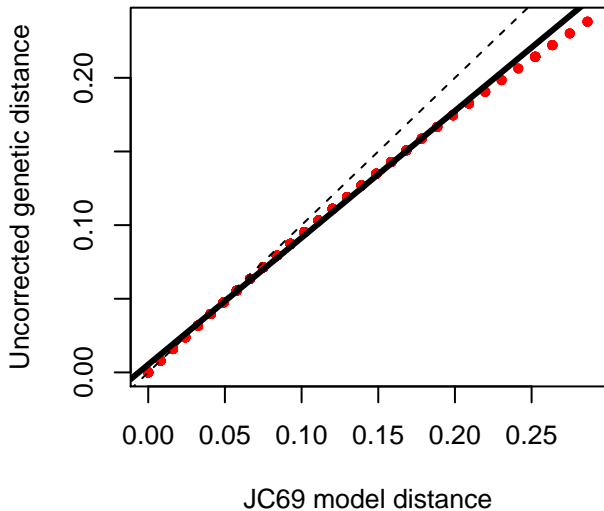

**psaJ Saturation (1st Pos)**

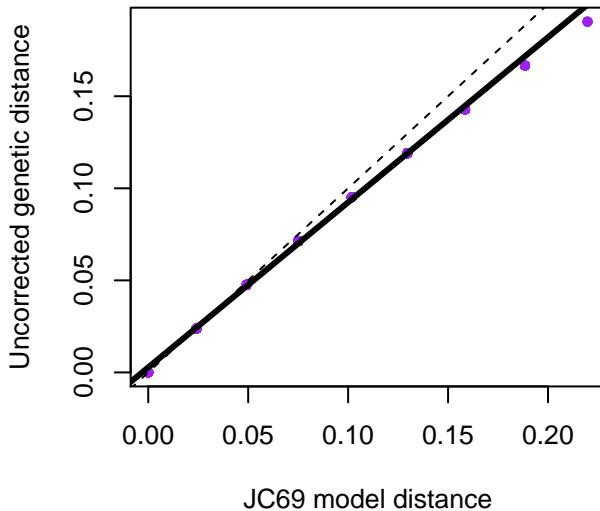

**psaJ Saturation (2nd Pos)**

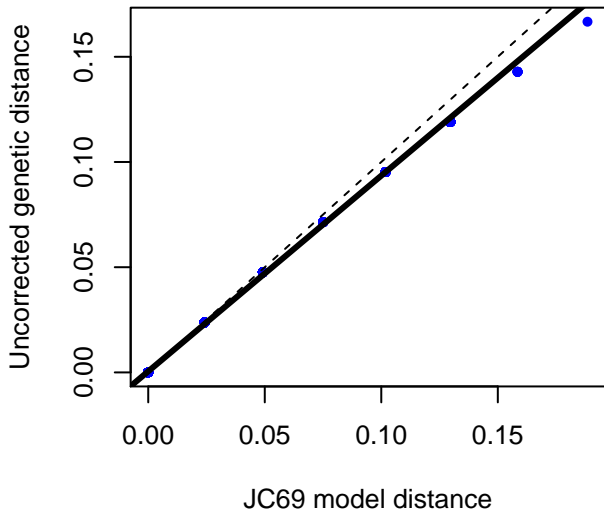

**psaJ Saturation (3rd Pos)**

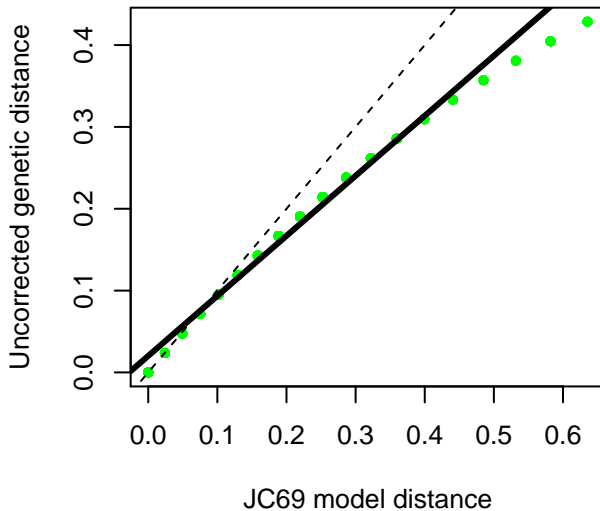

**psbA Saturation (All Bases)**

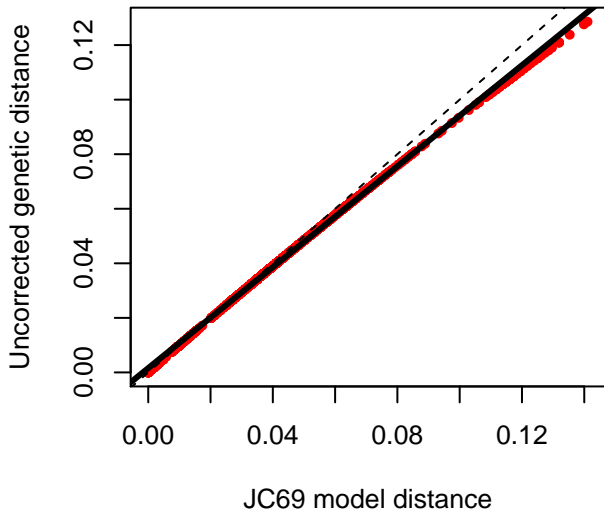

**psbA Saturation (1st Pos)**

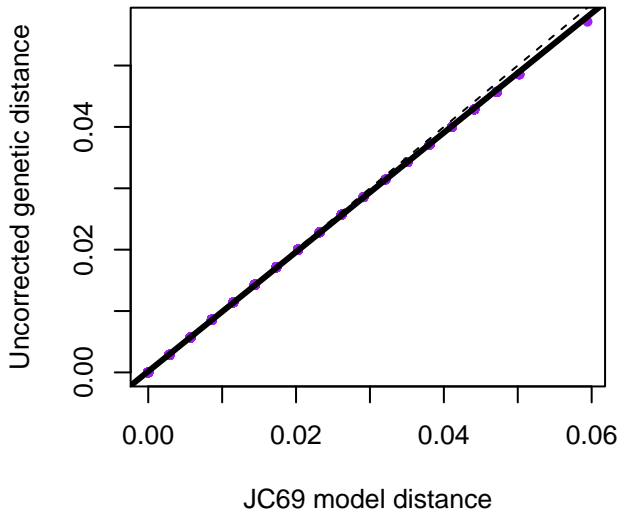

**psbA Saturation (2nd Pos)**

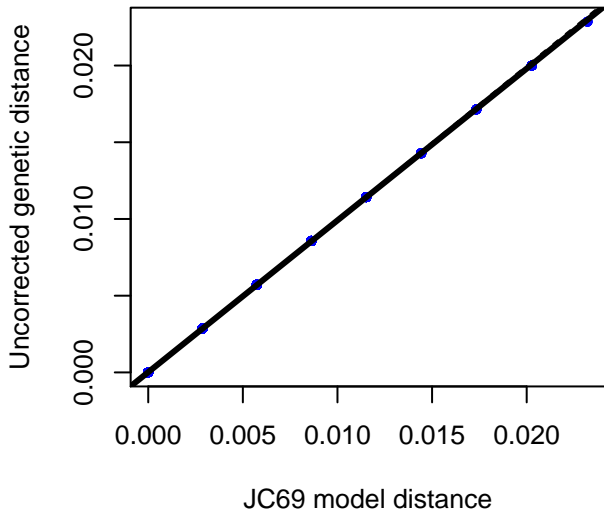

**psbA Saturation (3rd Pos)**

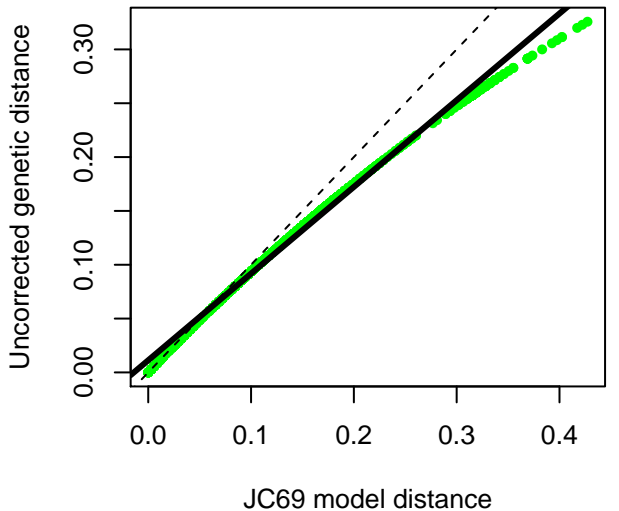

**psbB Saturation (All Bases)**

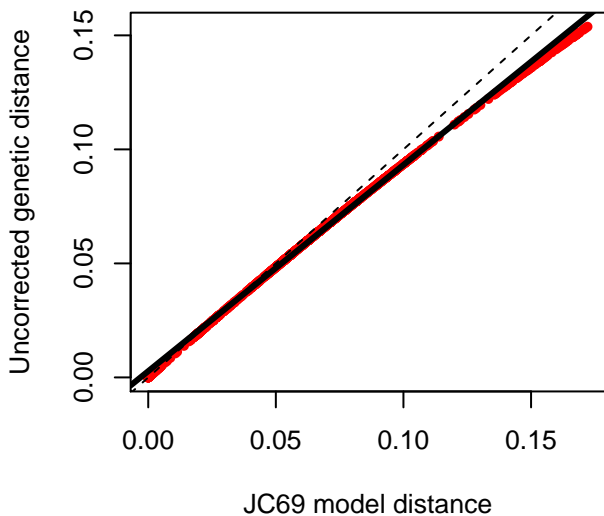

**psbB Saturation (1st Pos)**

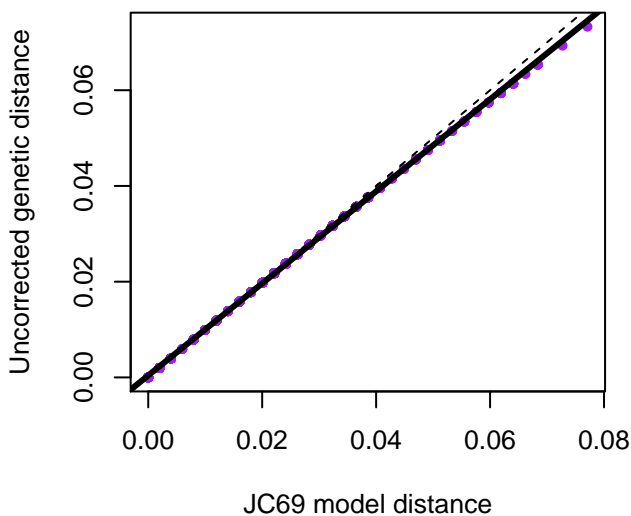

**psbB Saturation (2nd Pos)**

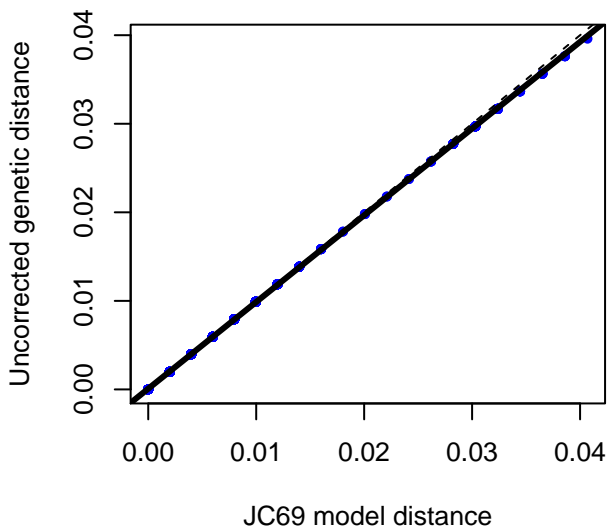

**psbB Saturation (3rd Pos)**

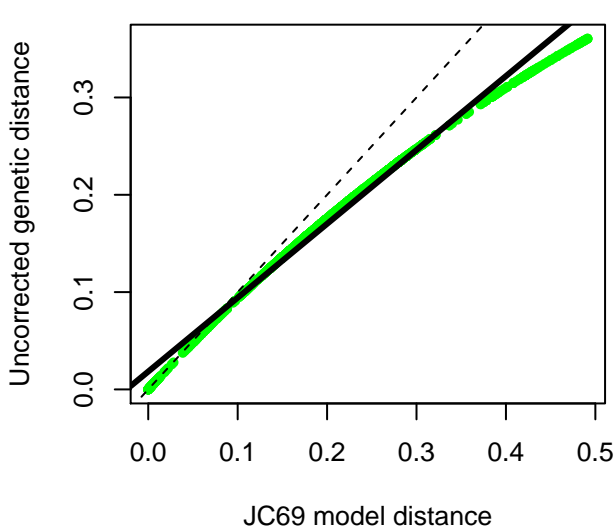

**psbC Saturation (All Bases)**

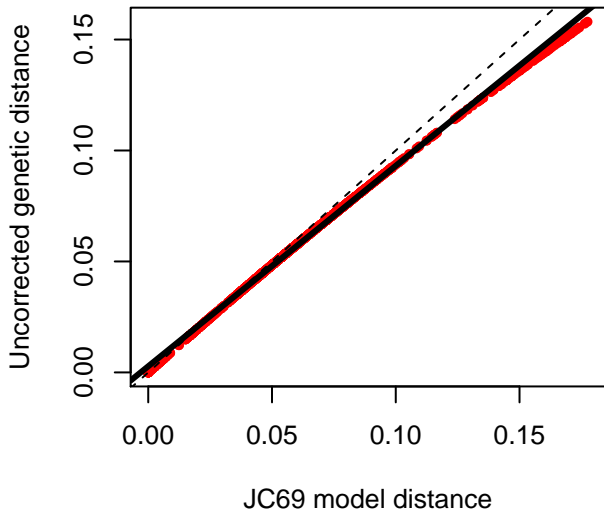

**psbC Saturation (1st Pos)**

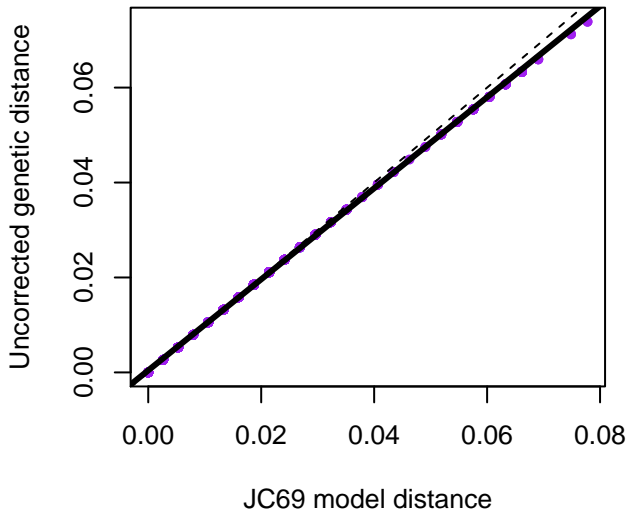

**psbC Saturation (2nd Pos)**

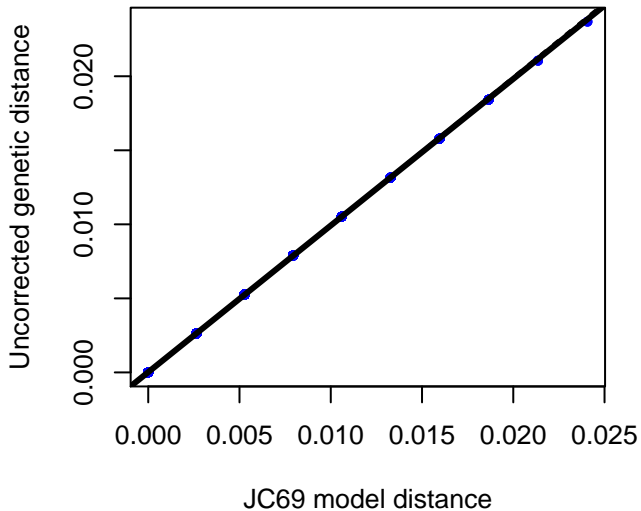

**psbC Saturation (3rd Pos)**

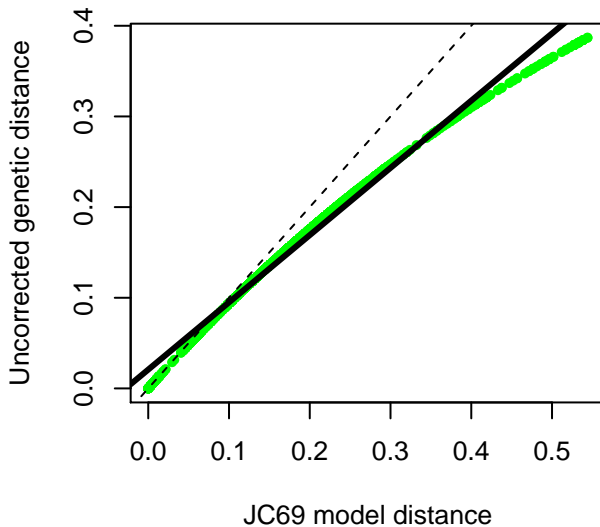

**psbD Saturation (All Bases)**

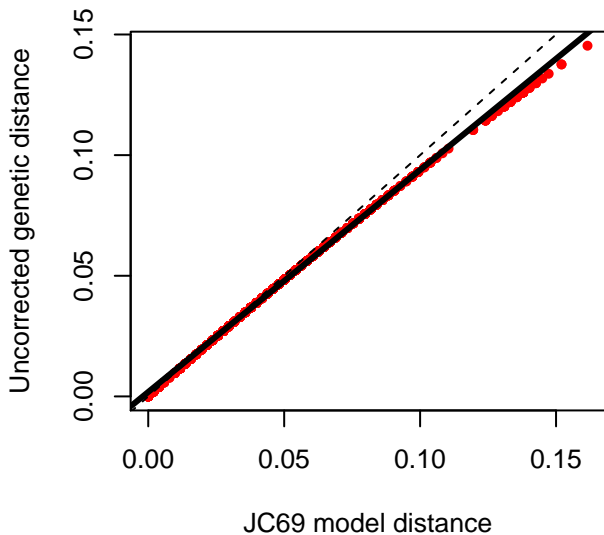

**psbD Saturation (1st Pos)**

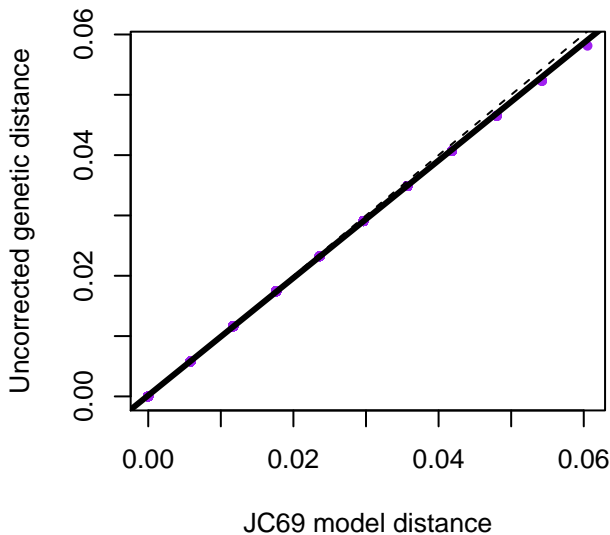

**psbD Saturation (2nd Pos)**

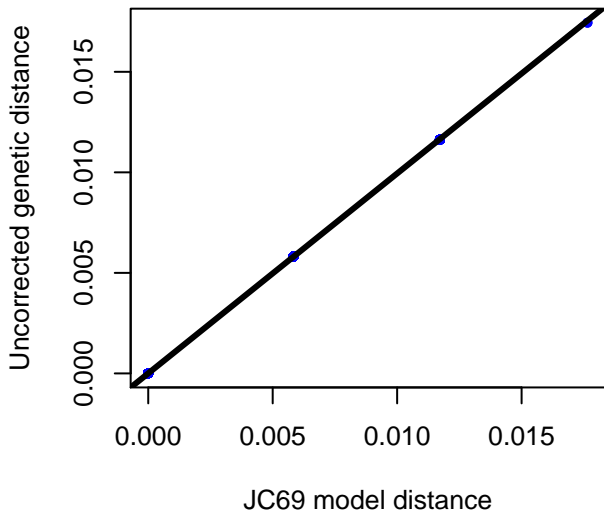

**psbD Saturation (3rd Pos)**

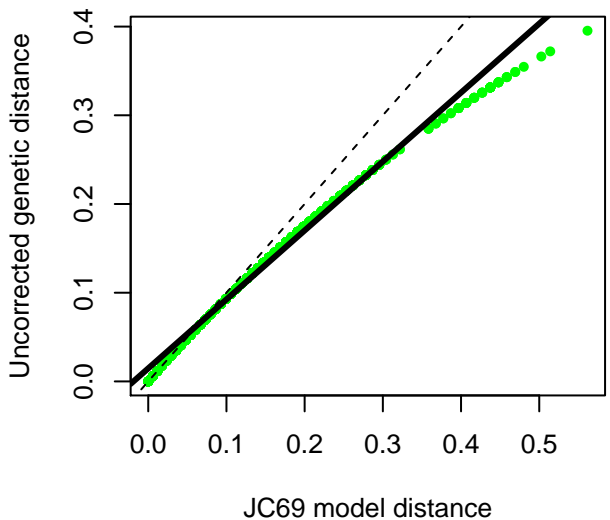

**psbE Saturation (All Bases)**

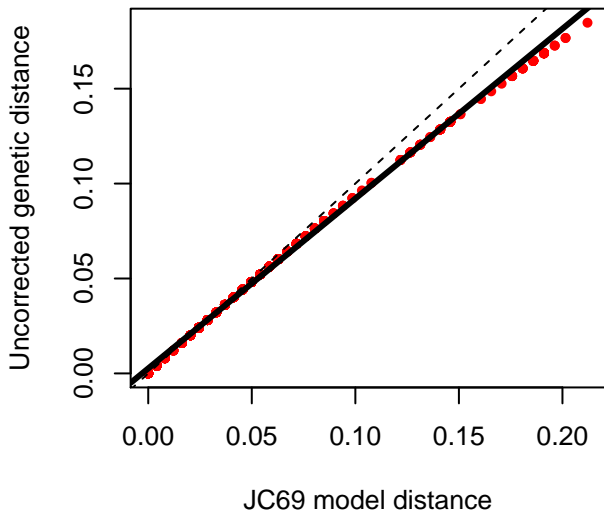

**psbE Saturation (1st Pos)**

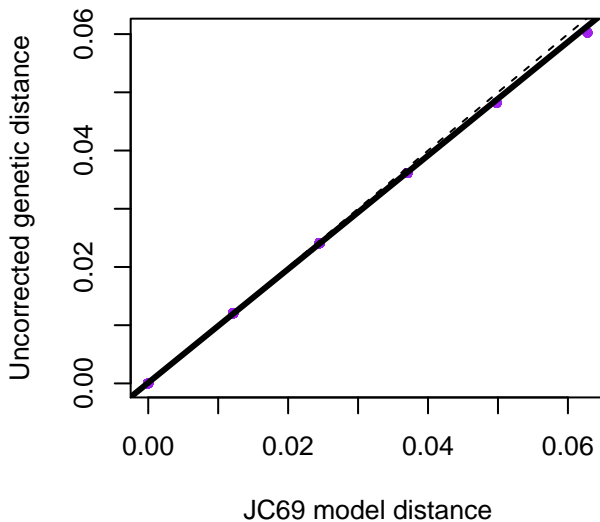

**psbE Saturation (2nd Pos)**

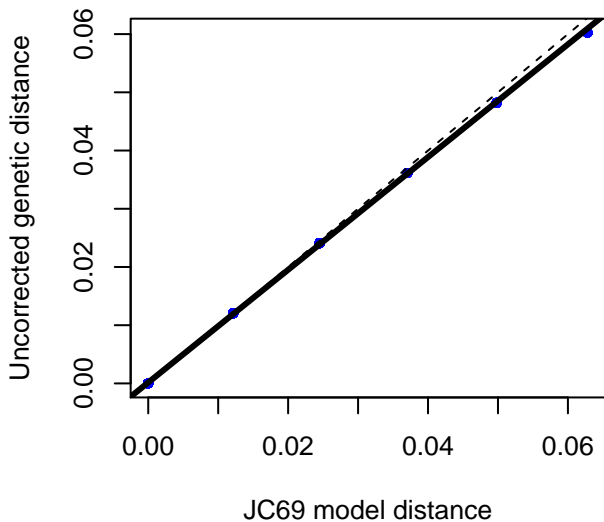

**psbE Saturation (3rd Pos)**

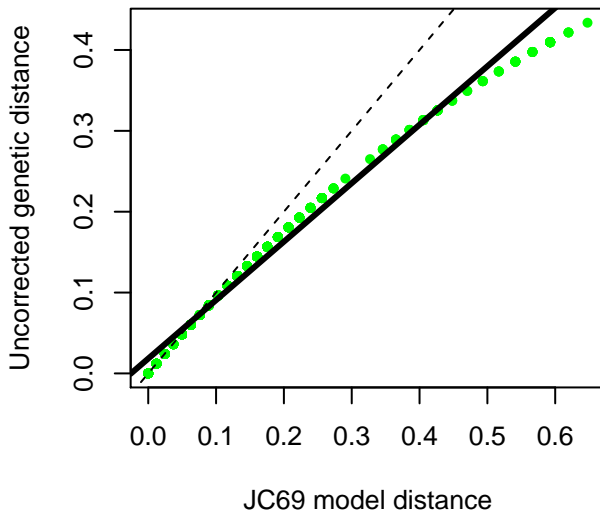

**psbF Saturation (All Bases)**

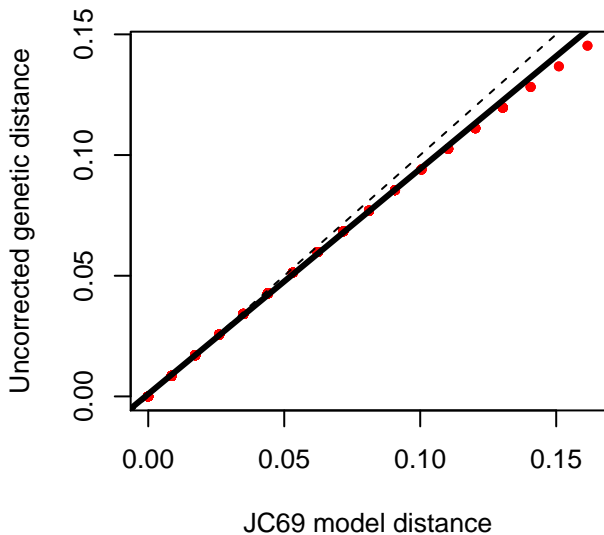

**psbF Saturation (1st Pos)**

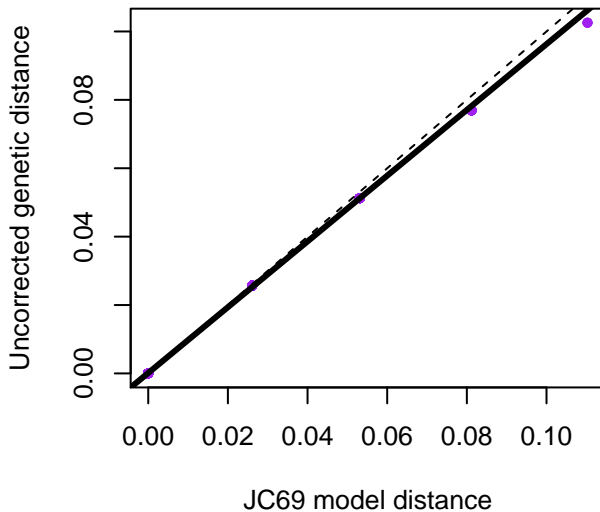

**psbF Saturation (2nd Pos)**

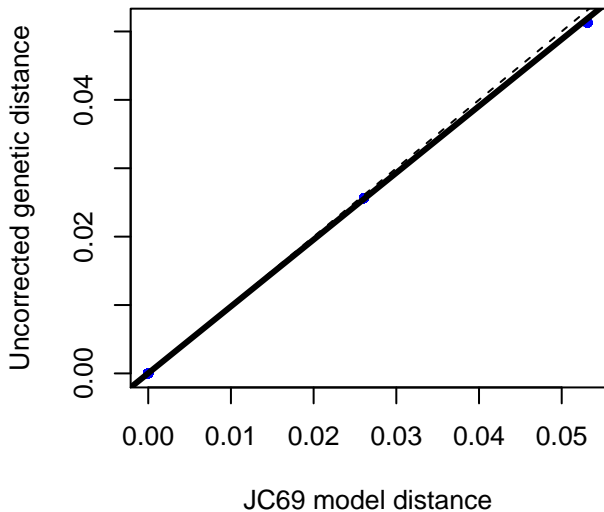

**psbF Saturation (3rd Pos)**

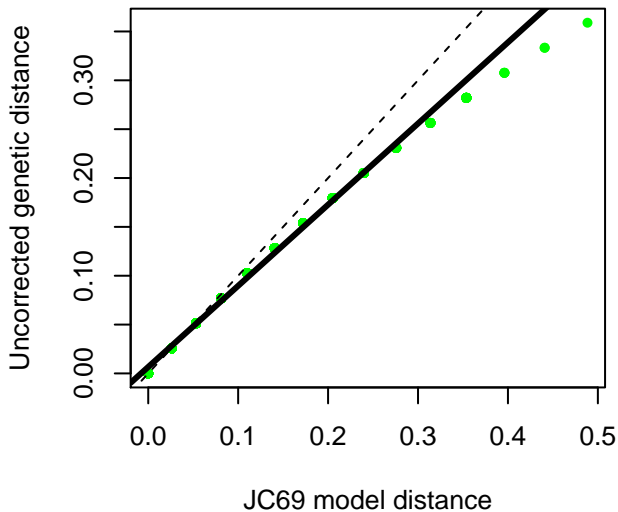



**psbH Saturation (All Bases)**

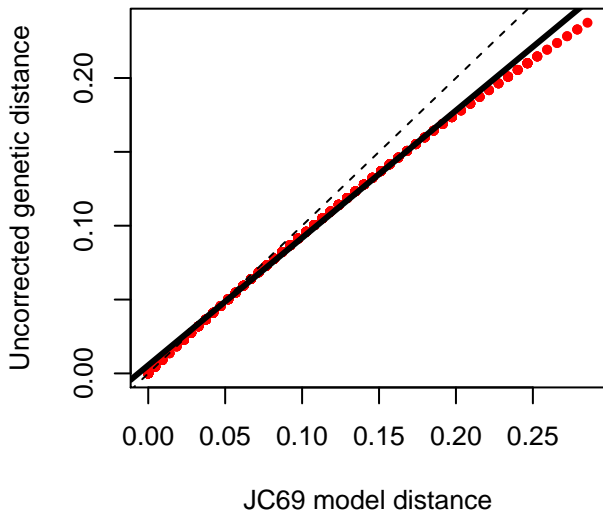

**psbH Saturation (1st Pos)**

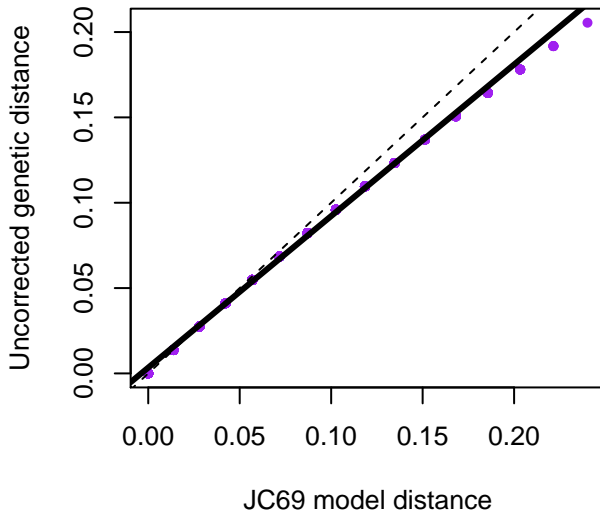

**psbH Saturation (2nd Pos)**

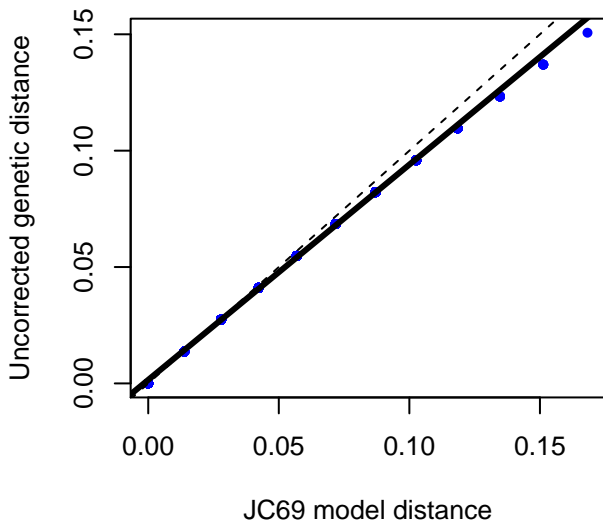

**psbH Saturation (3rd Pos)**

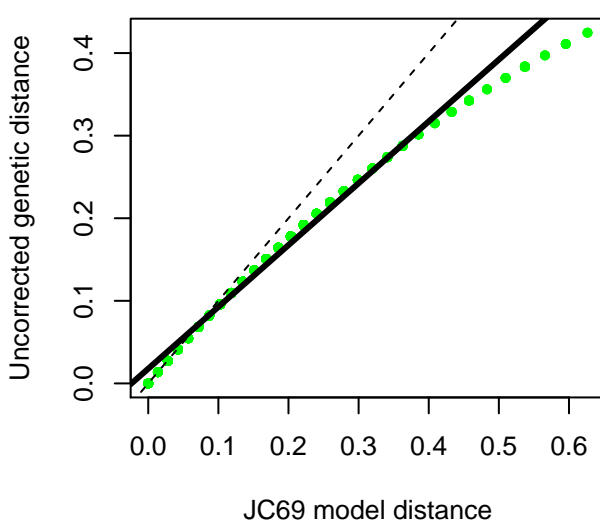

**psbl Saturation (All Bases)**

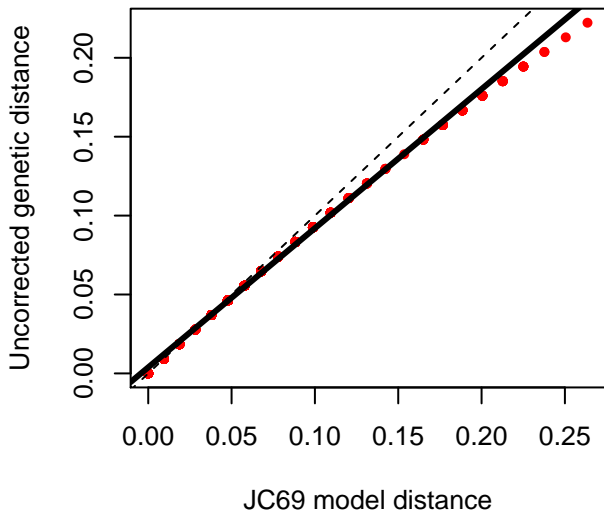

**psbl Saturation (1st Pos)**

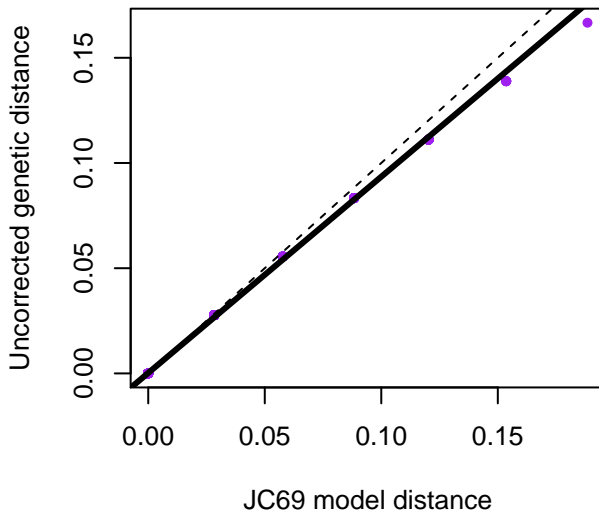

**psbl Saturation (2nd Pos)**

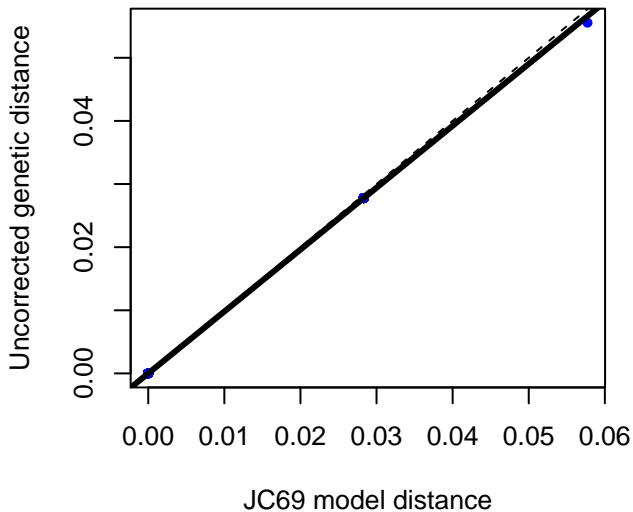

**psbl Saturation (3rd Pos)**

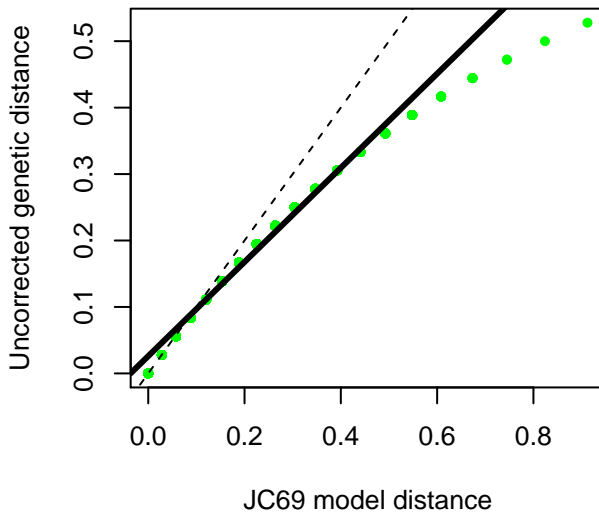

**psbJ Saturation (All Bases)**

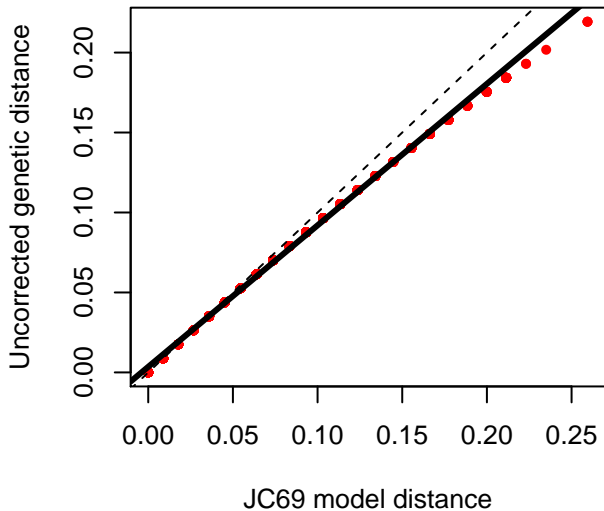

**psbJ Saturation (1st Pos)**

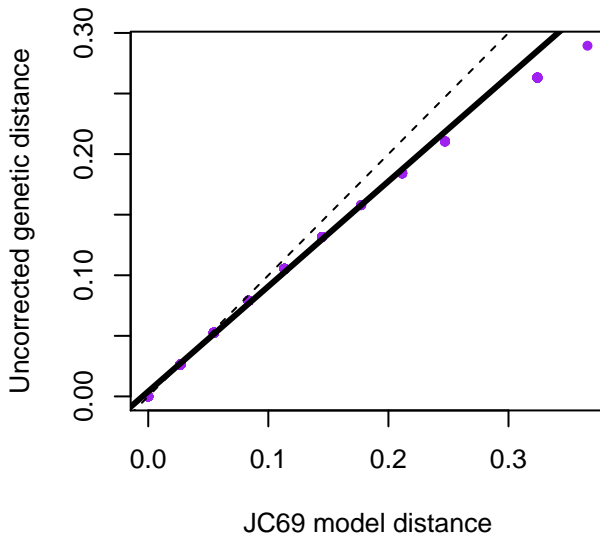

**psbJ Saturation (2nd Pos)**

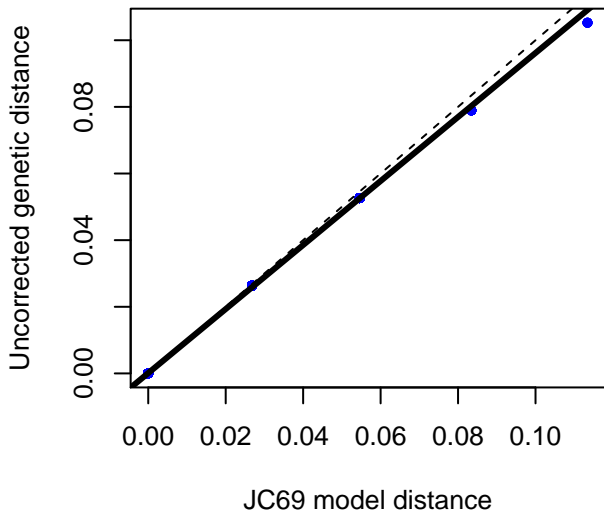

**psbJ Saturation (3rd Pos)**

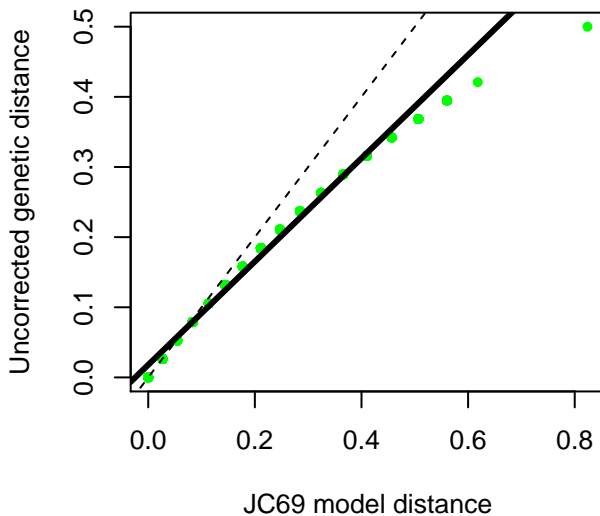

**psbK Saturation (All Bases)**

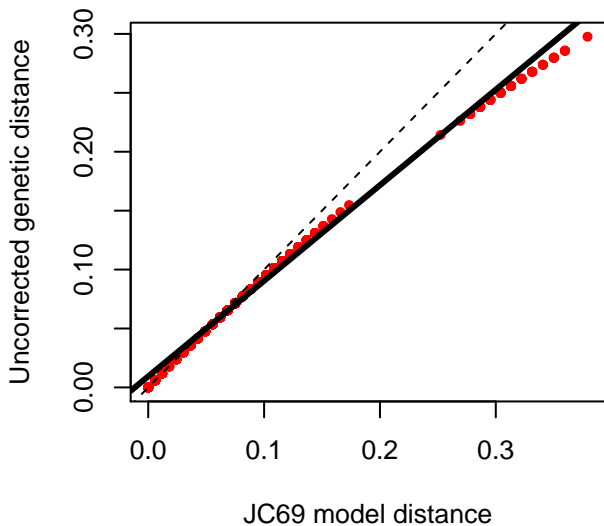

**psbK Saturation (1st Pos)**

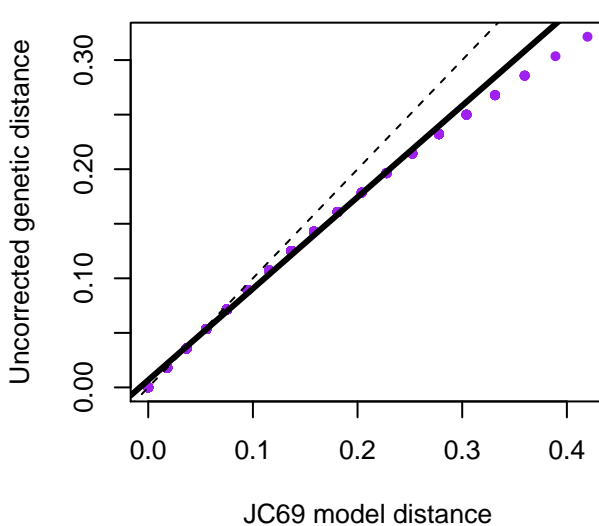

**psbK Saturation (2nd Pos)**

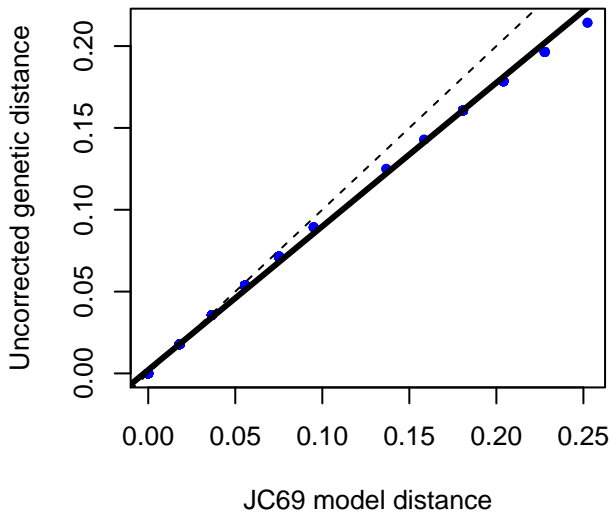

**psbK Saturation (3rd Pos)**

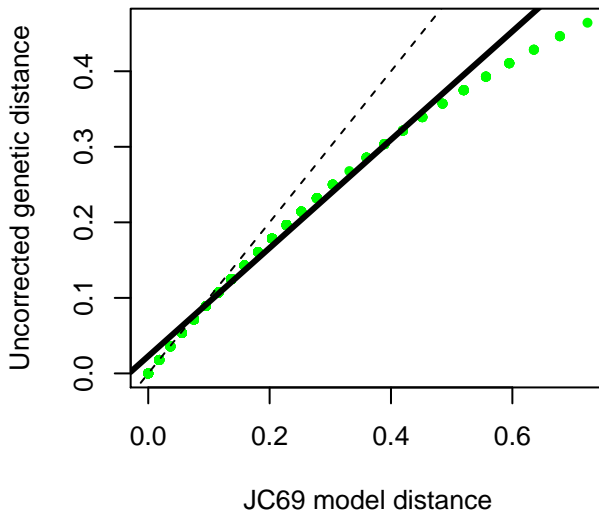

**psbL Saturation (All Bases)**

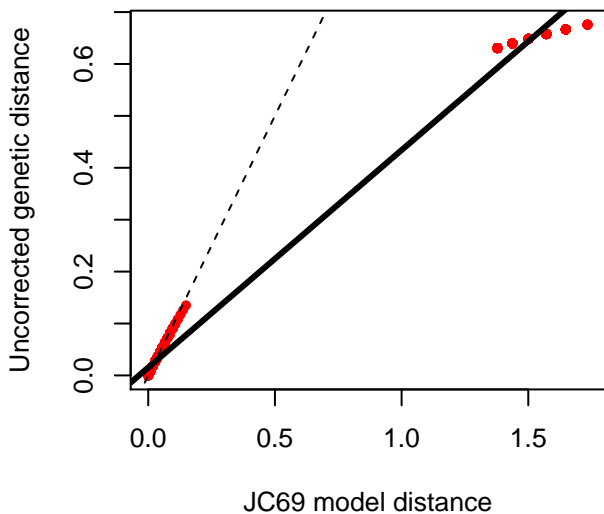

**psbL Saturation (1st Pos)**

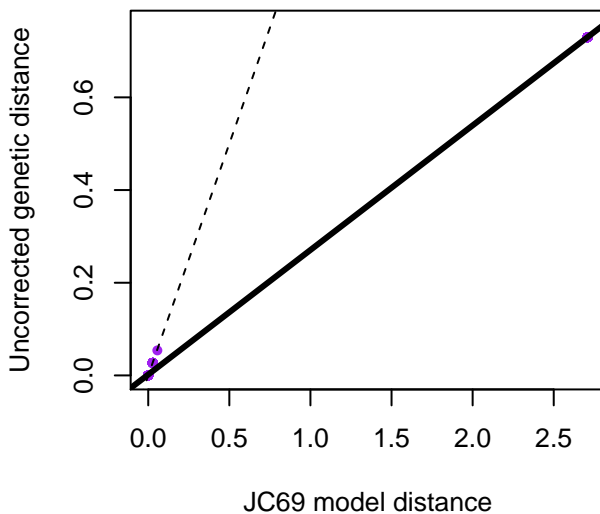

**psbL Saturation (2nd Pos)**

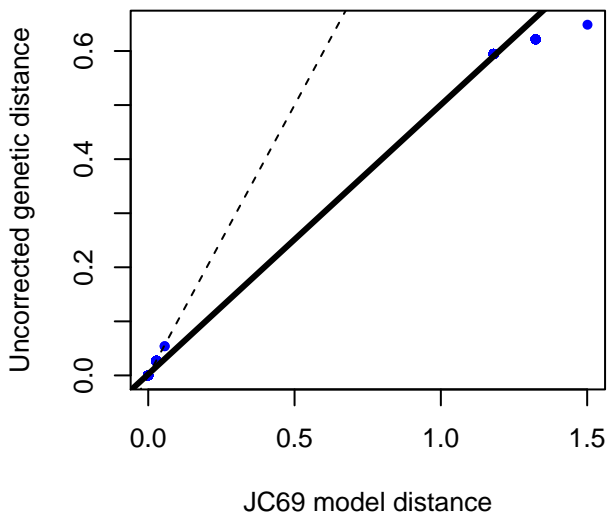

**psbL Saturation (3rd Pos)**

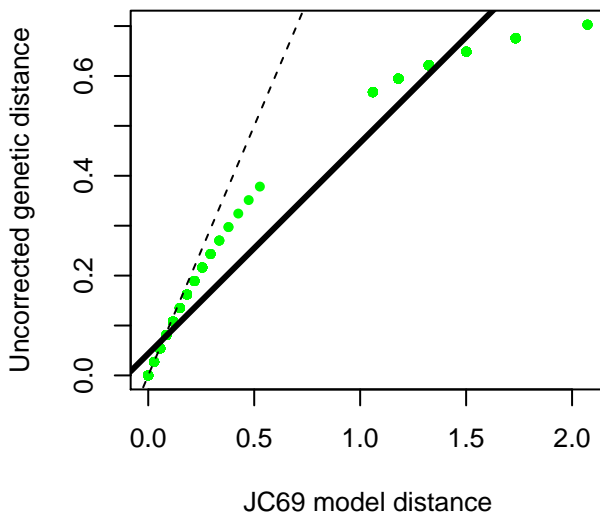

**psbM Saturation (All Bases)**

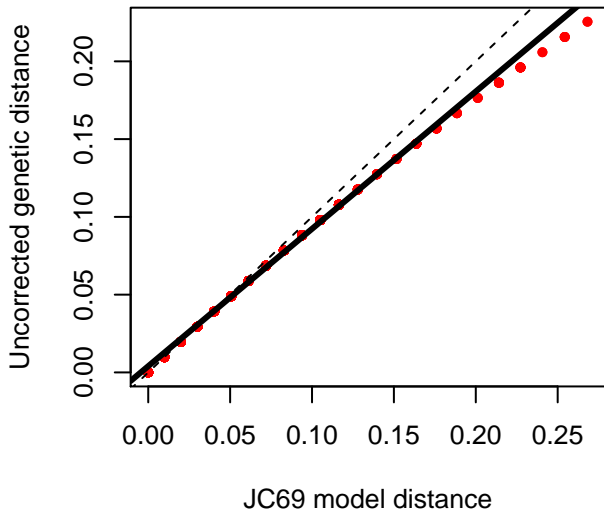

**psbM Saturation (1st Pos)**

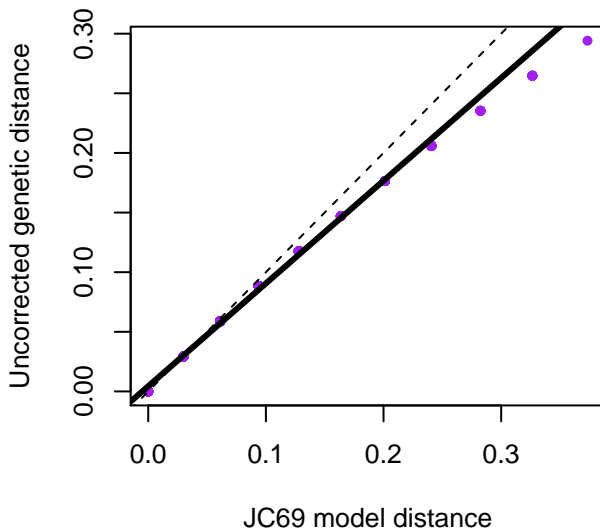

**psbM Saturation (2nd Pos)**

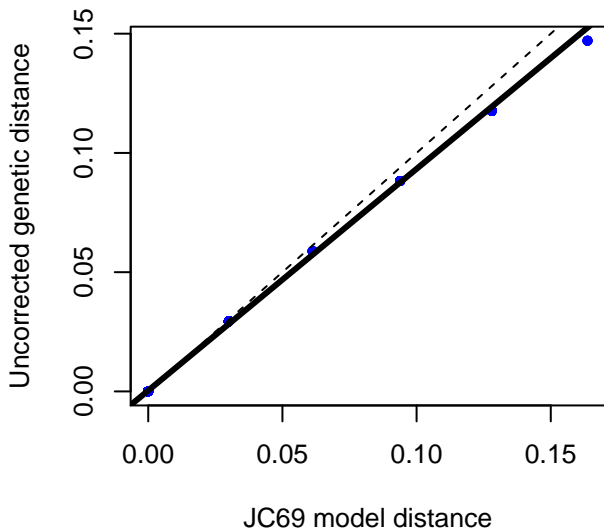

**psbM Saturation (3rd Pos)**

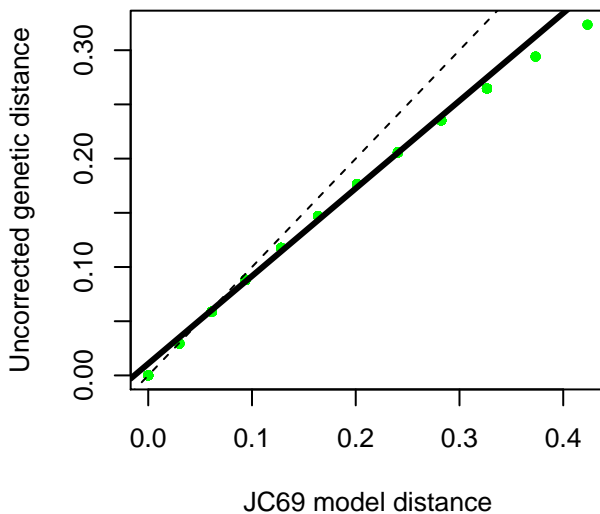

**psbN Saturation (All Bases)**

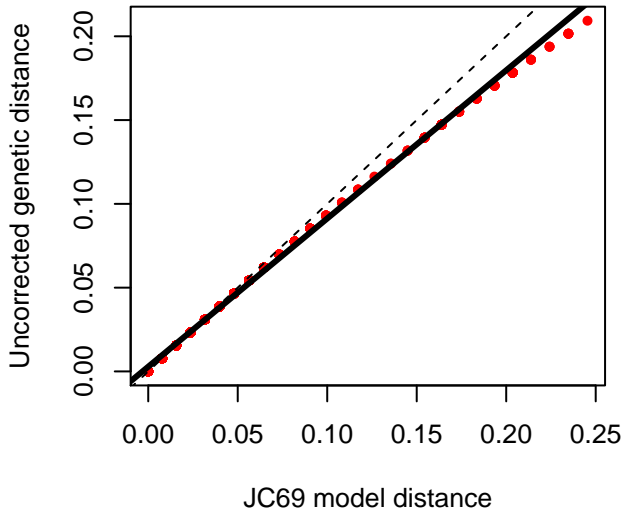

**psbN Saturation (1st Pos)**

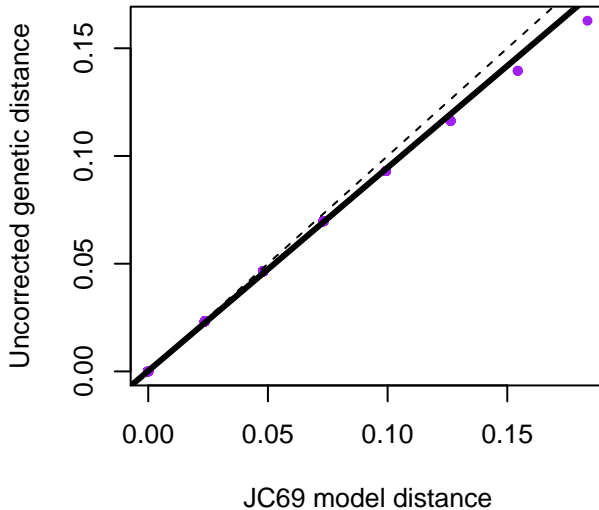

**psbN Saturation (2nd Pos)**

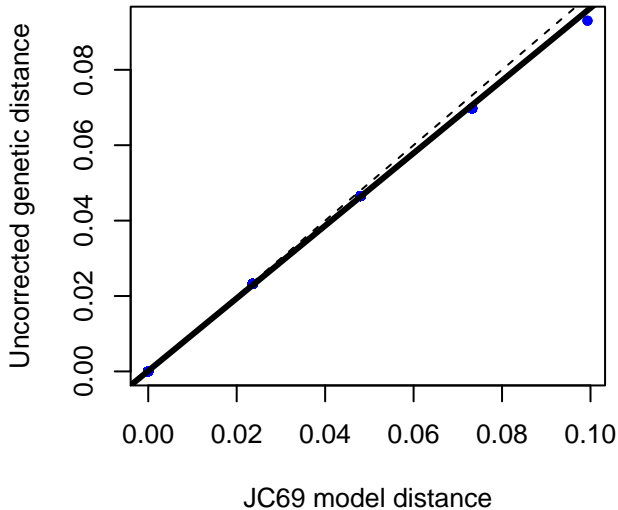

**psbN Saturation (3rd Pos)**

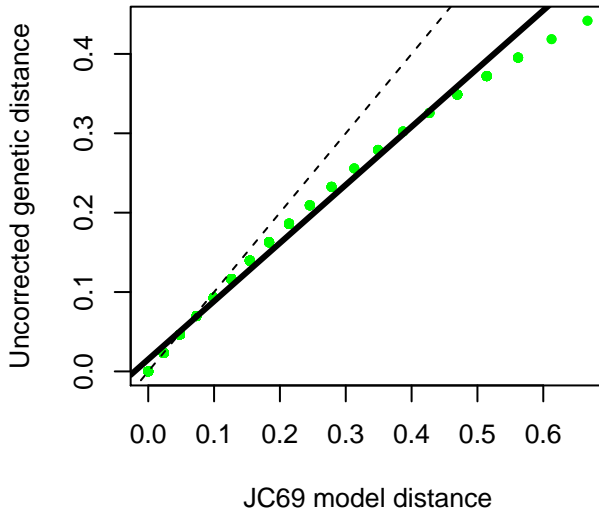

**psbT Saturation (All Bases)**

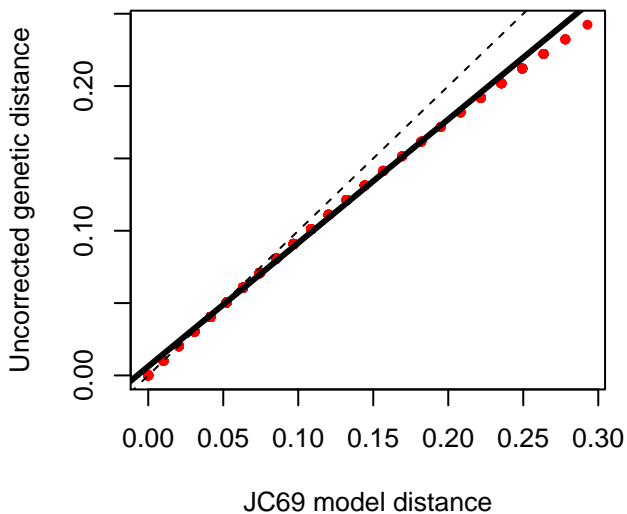

**psbT Saturation (1st Pos)**

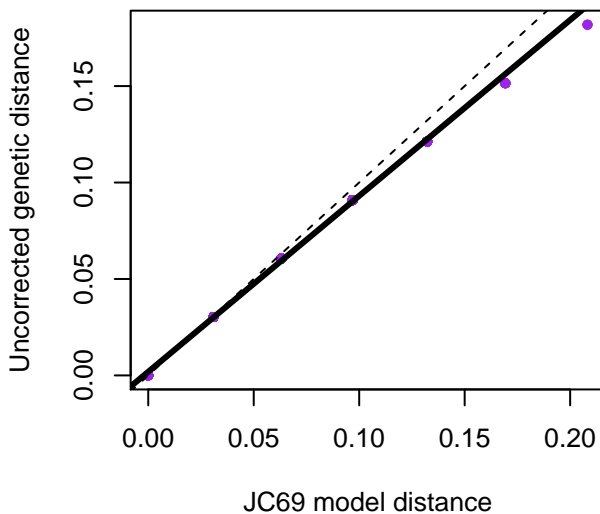

**psbT Saturation (2nd Pos)**

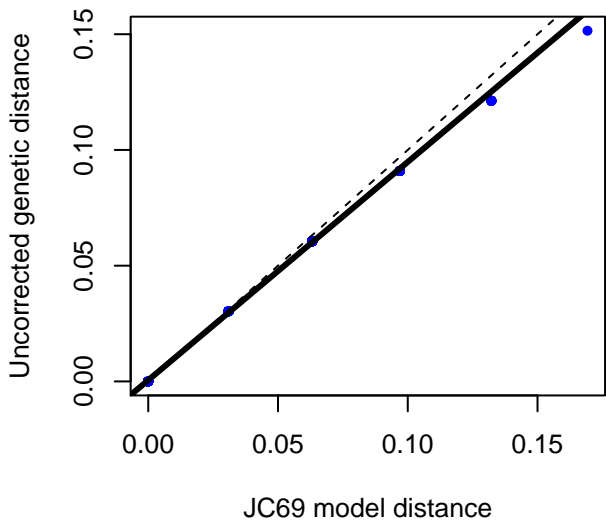

**psbT Saturation (3rd Pos)**

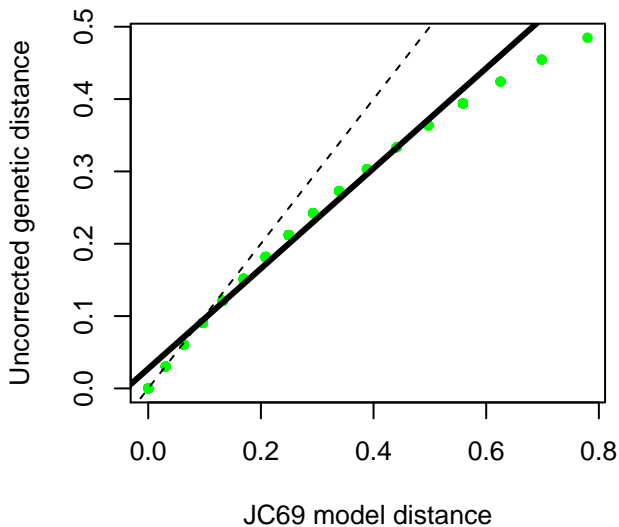



**psbZ Saturation (All Bases)**

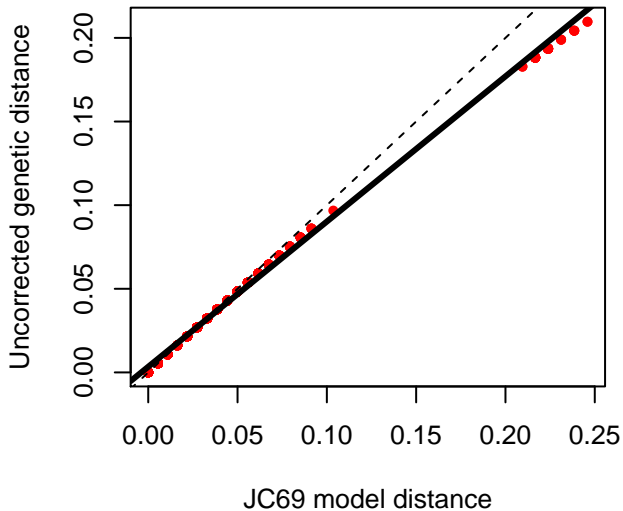

**psbZ Saturation (1st Pos)**

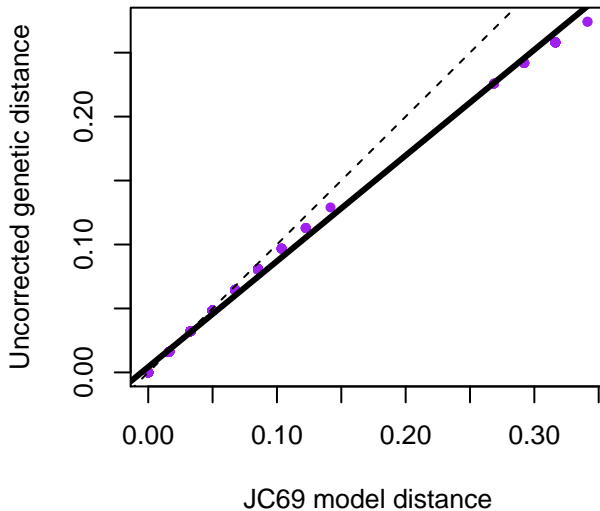

**psbZ Saturation (2nd Pos)**

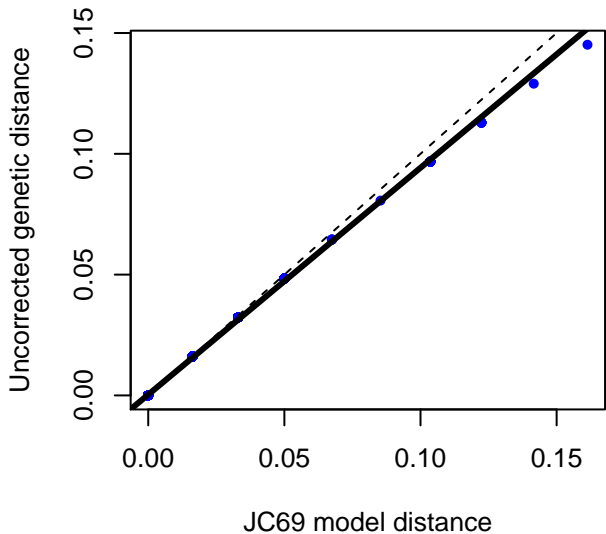

**psbZ Saturation (3rd Pos)**

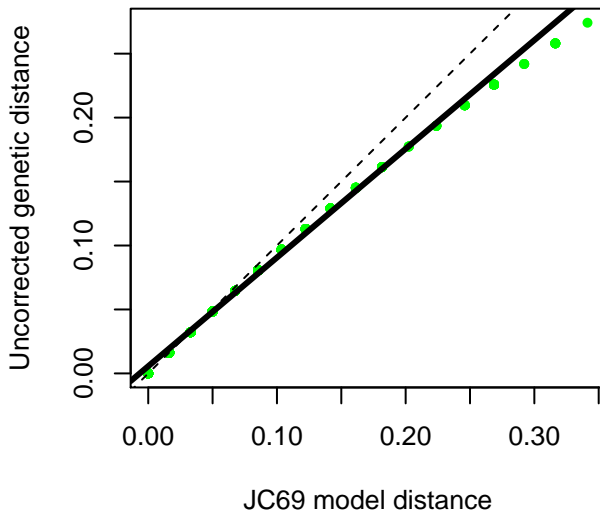

**rbcl Saturation (All Bases)**

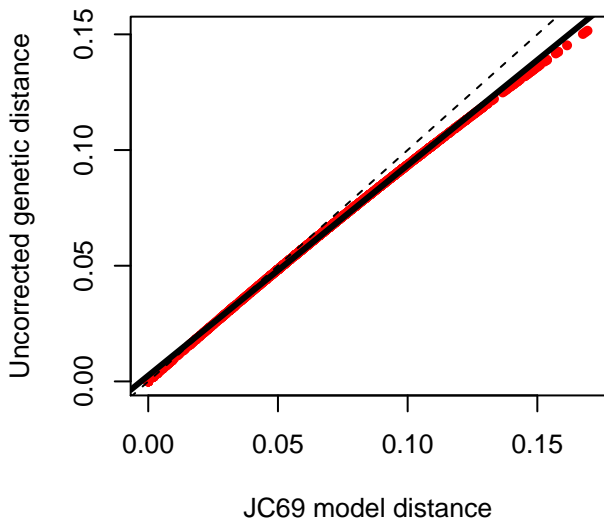

**rbcl Saturation (1st Pos)**

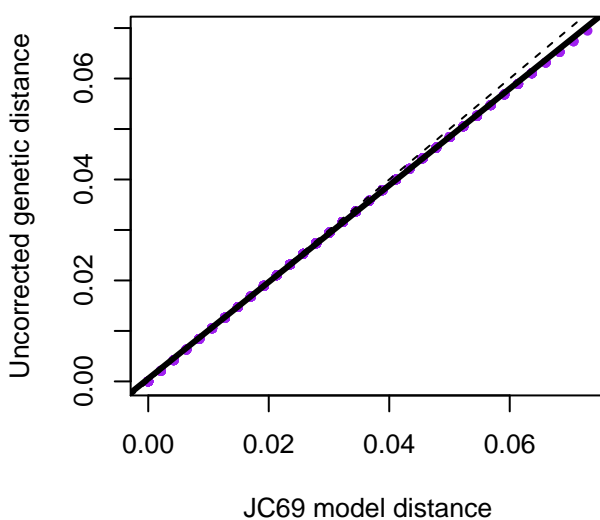

**rbcl Saturation (2nd Pos)**

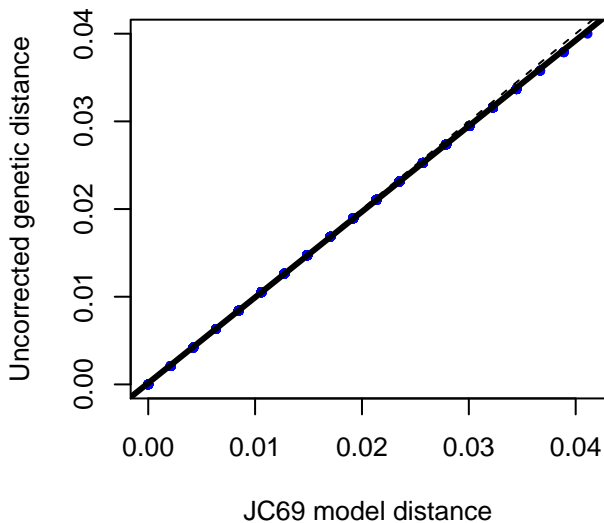

**rbcl Saturation (3rd Pos)**

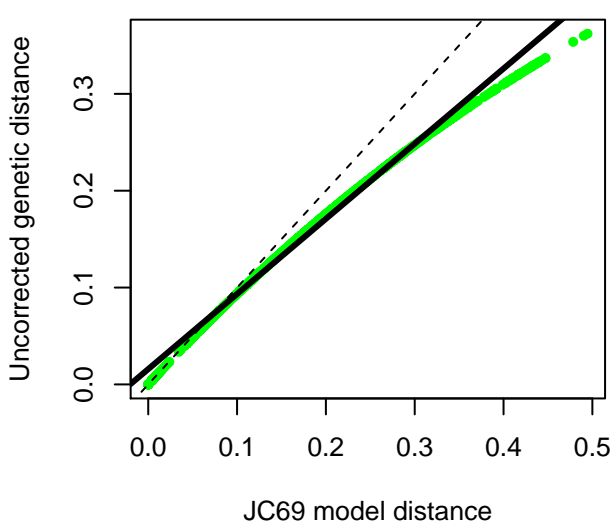

**rpl14 Saturation (All Bases)**

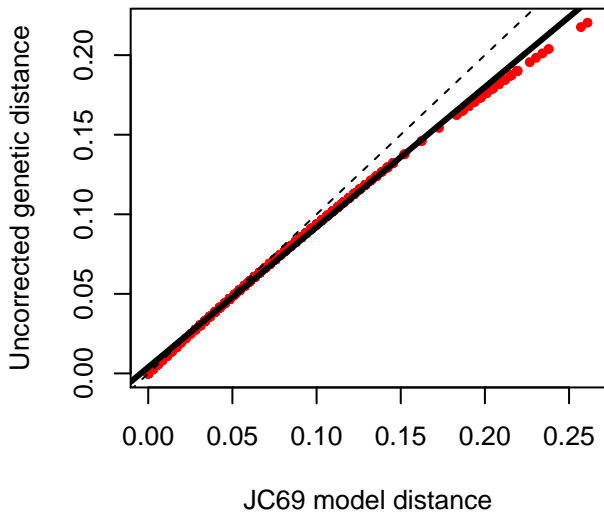

**rpl14 Saturation (1st Pos)**

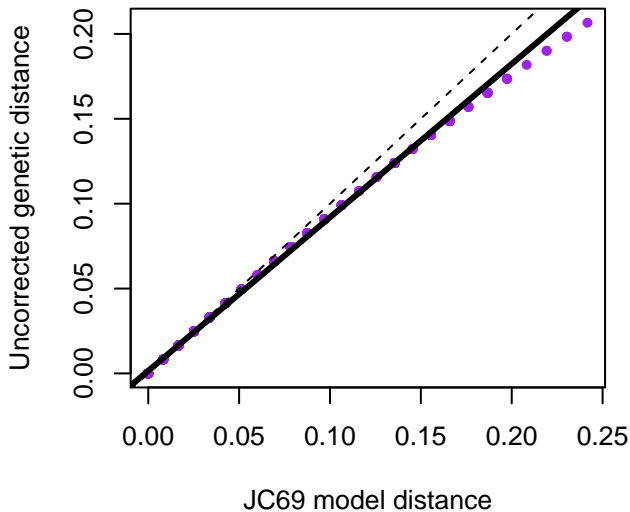

**rpl14 Saturation (2nd Pos)**

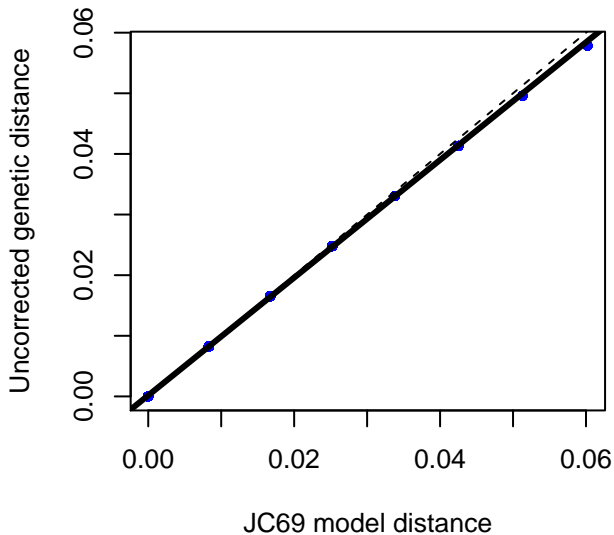

**rpl14 Saturation (3rd Pos)**

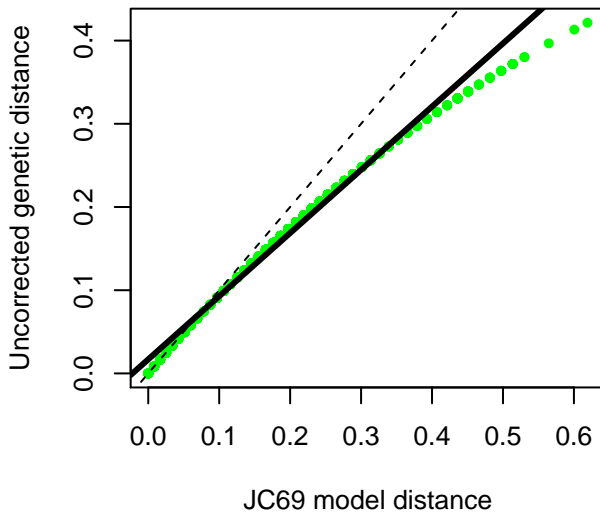

**rpl16 Saturation (All Bases)**

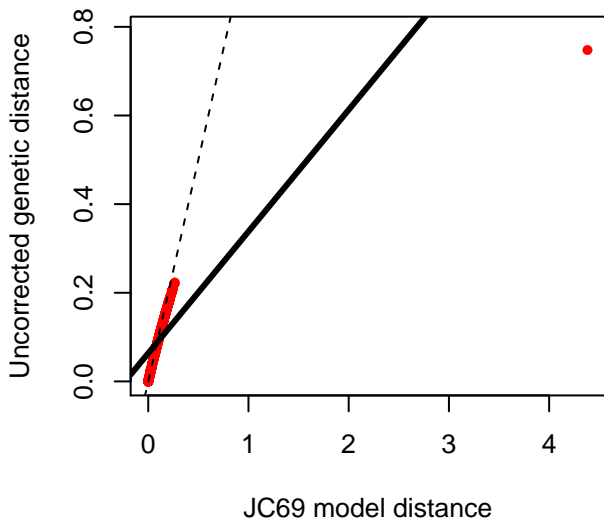

**rpl16 Saturation (1st Pos)**

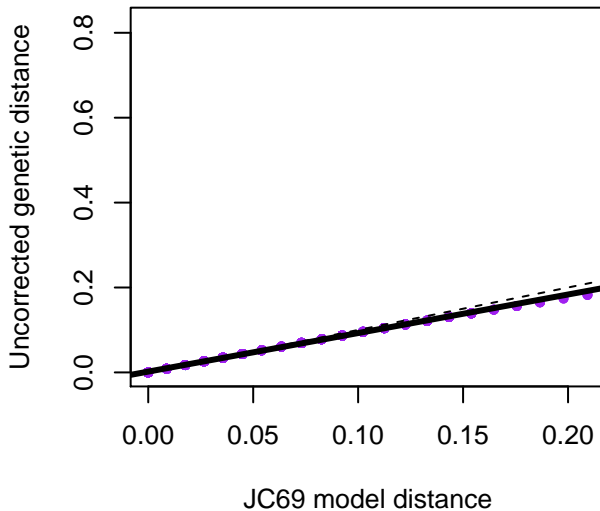

**rpl16 Saturation (2nd Pos)**

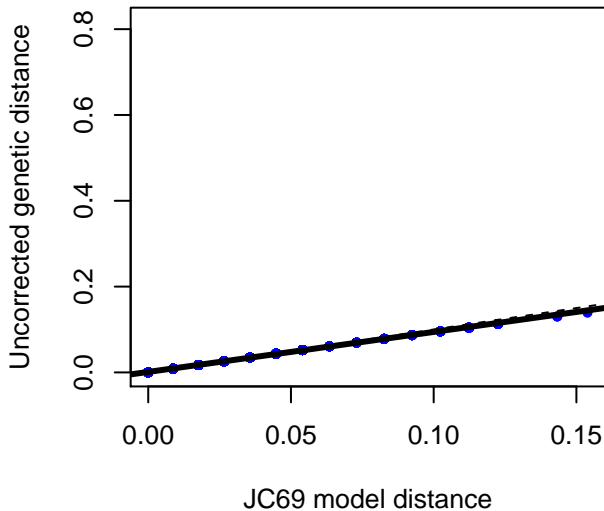

**rpl16 Saturation (3rd Pos)**

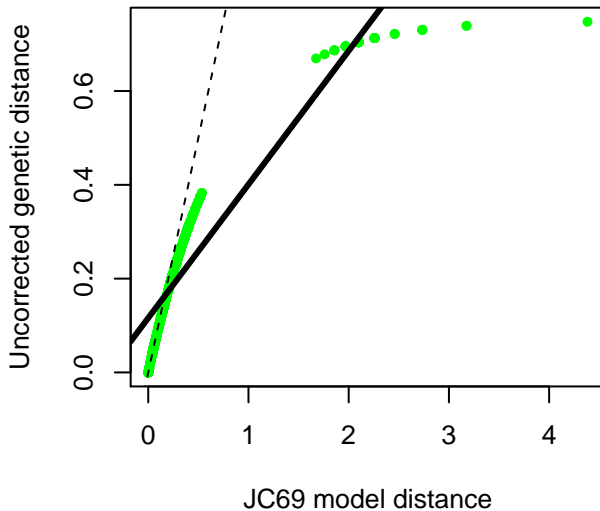

**rpl20 Saturation (All Bases)**

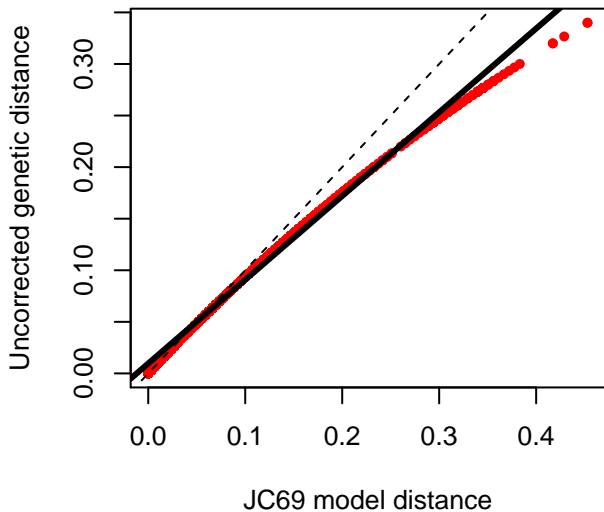

**rpl20 Saturation (1st Pos)**

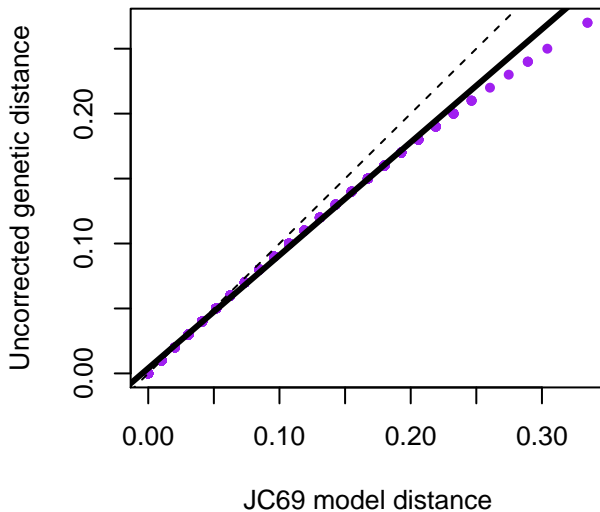

**rpl20 Saturation (2nd Pos)**

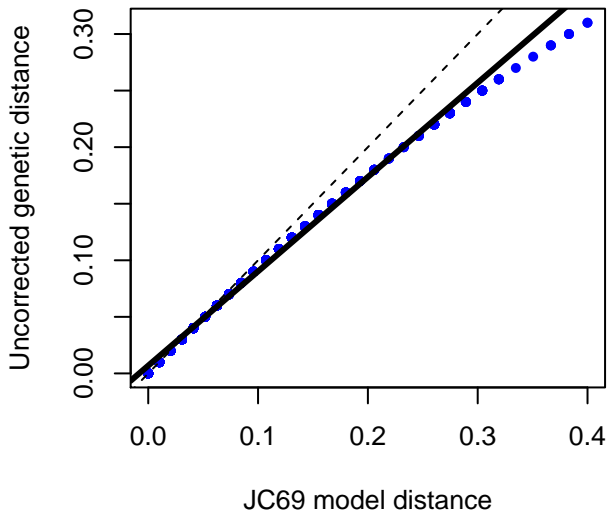

**rpl20 Saturation (3rd Pos)**

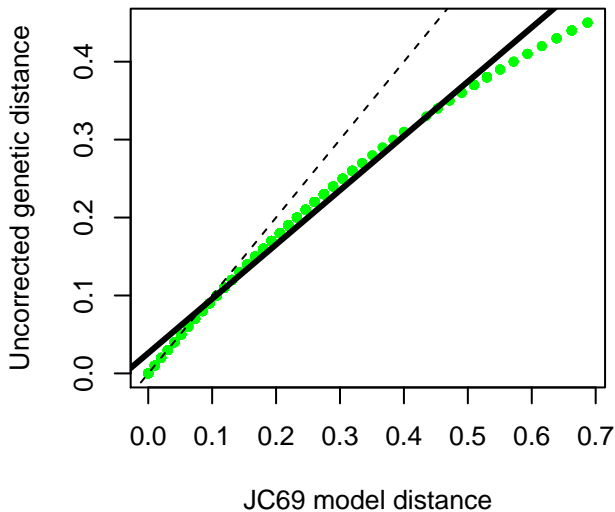

**rpl22 Saturation (All Bases)**

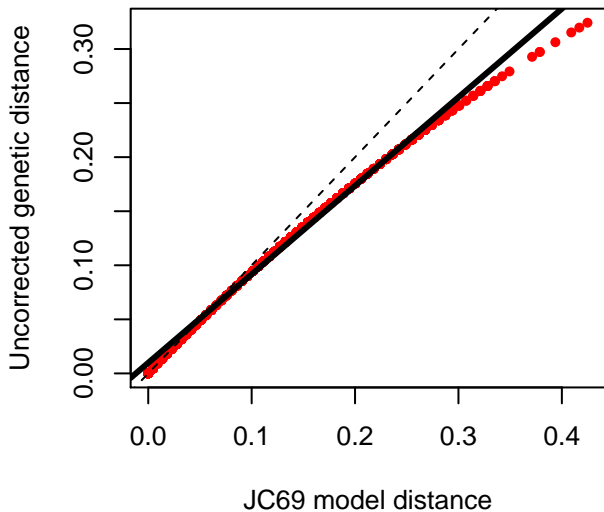

**rpl22 Saturation (1st Pos)**

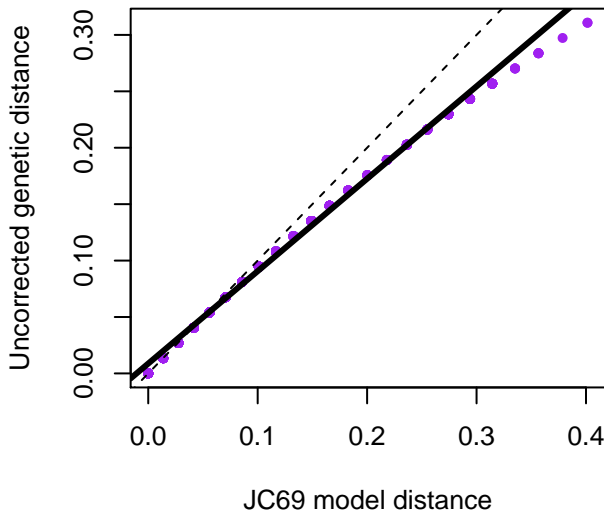

**rpl22 Saturation (2nd Pos)**

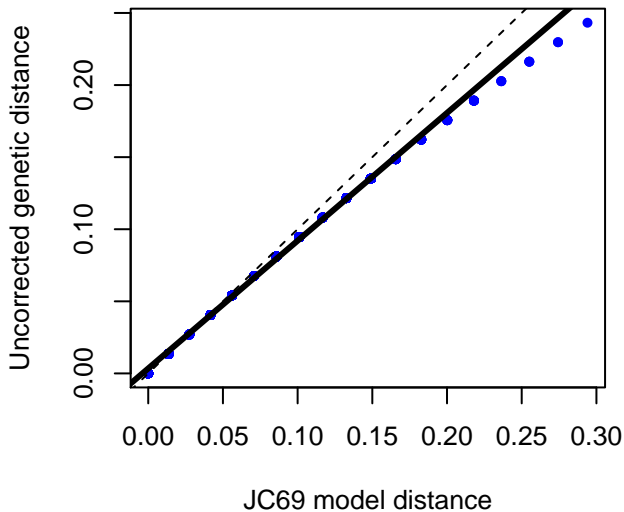

**rpl22 Saturation (3rd Pos)**

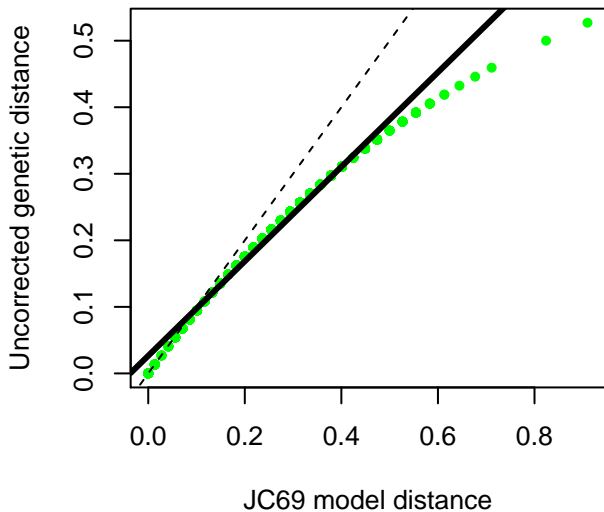

**rpl23 Saturation (All Bases)**

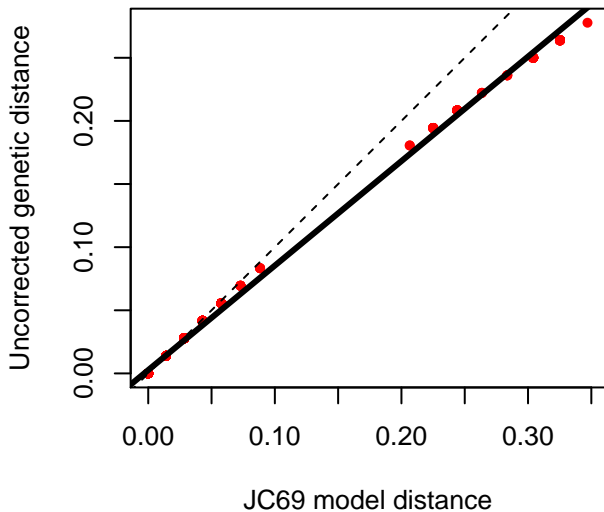

**rpl23 Saturation (1st Pos)**

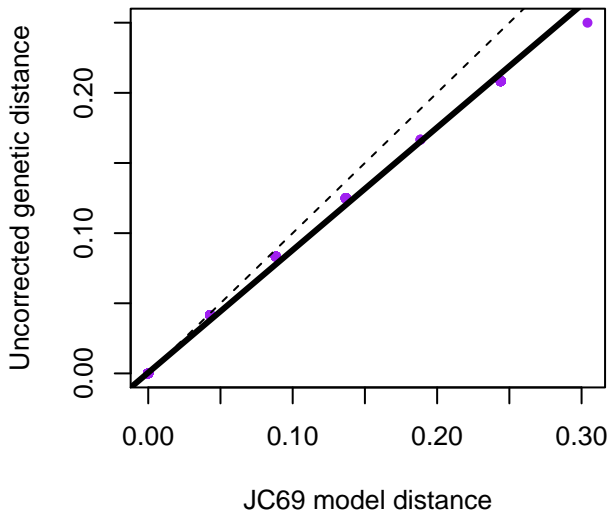

**rpl23 Saturation (2nd Pos)**

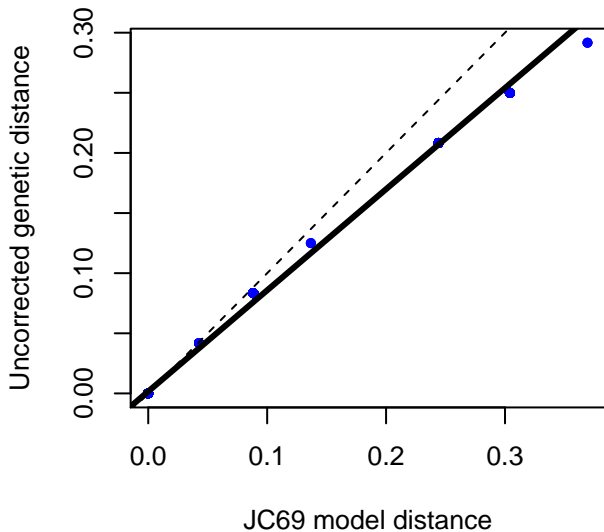

**rpl23 Saturation (3rd Pos)**

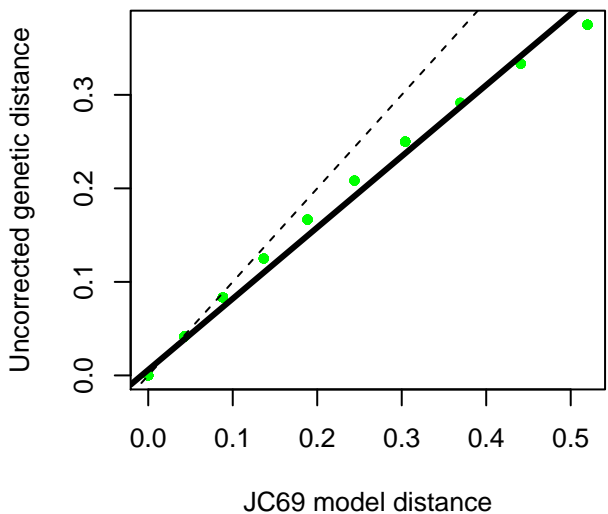

**rpl2 Saturation (All Bases)**

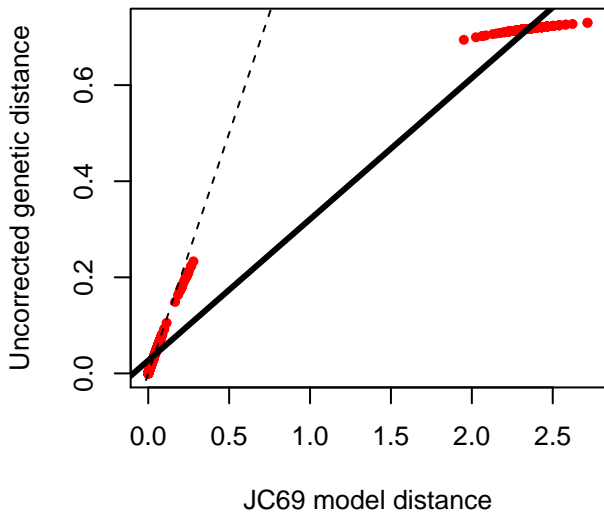

**rpl2 Saturation (1st Pos)**

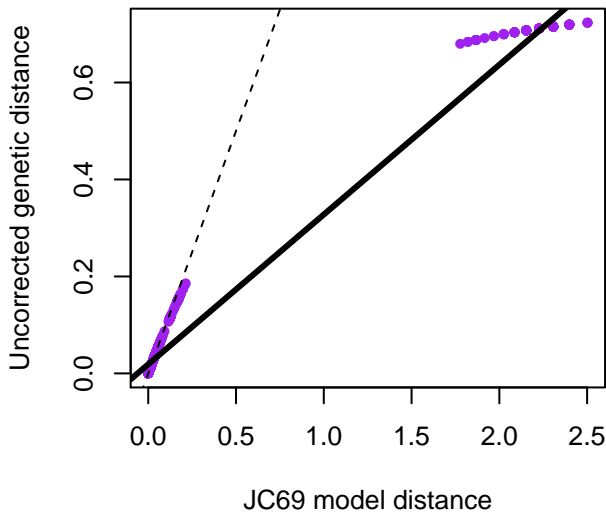

**rpl2 Saturation (2nd Pos)**

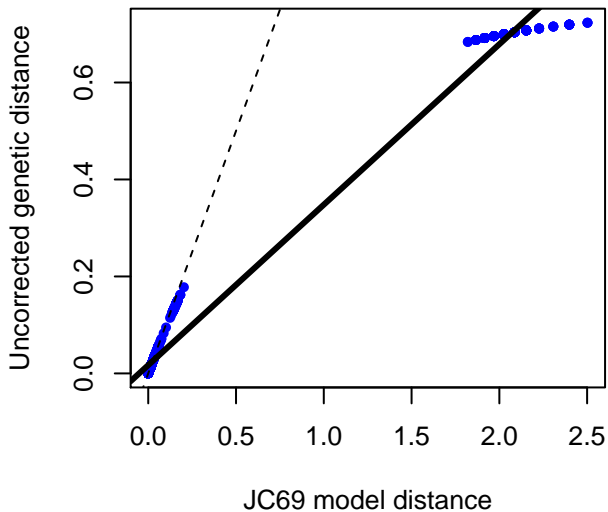

**rpl2 Saturation (3rd Pos)**

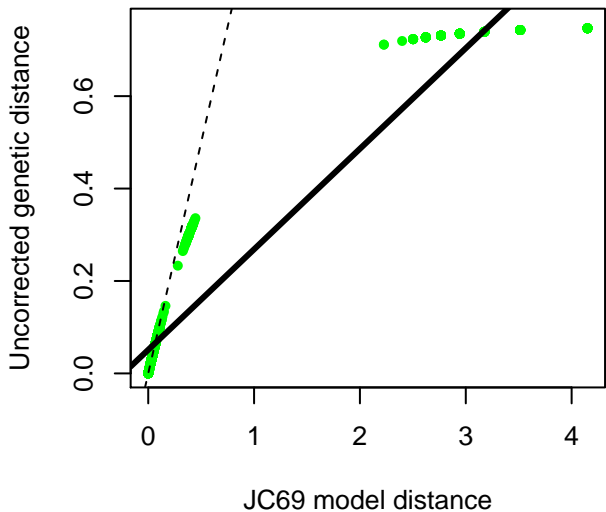



**rpl32 Saturation (All Bases)**

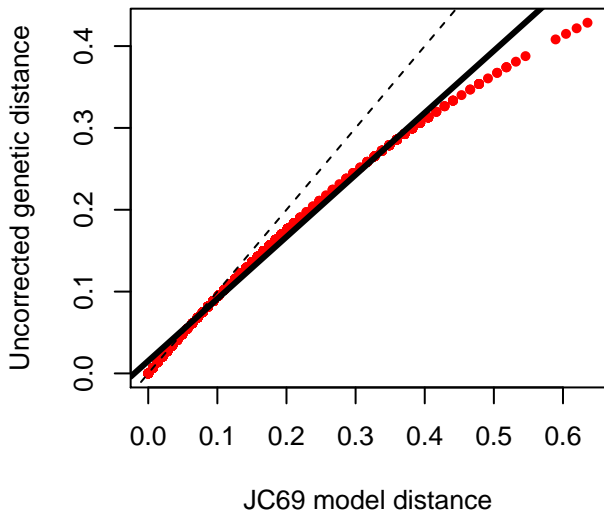

**rpl32 Saturation (1st Pos)**

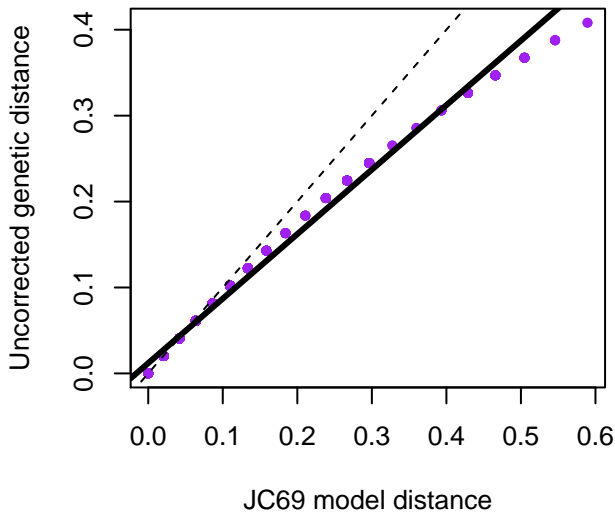

**rpl32 Saturation (2nd Pos)**

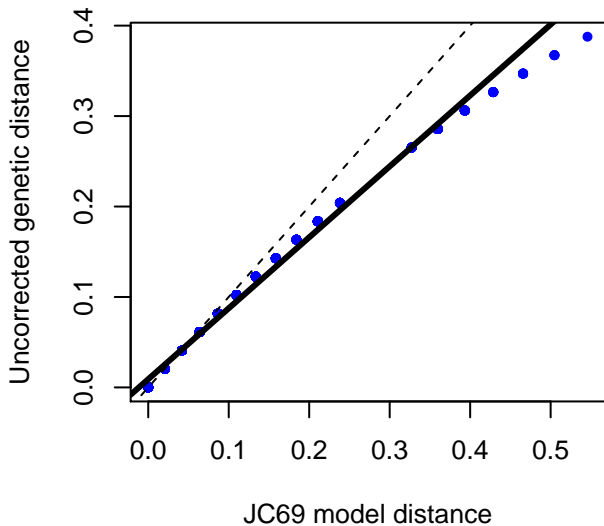

**rpl32 Saturation (3rd Pos)**

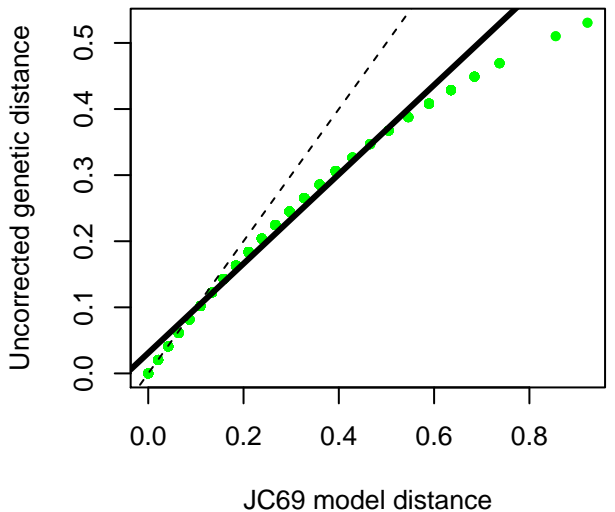

**rpl33 Saturation (All Bases)**

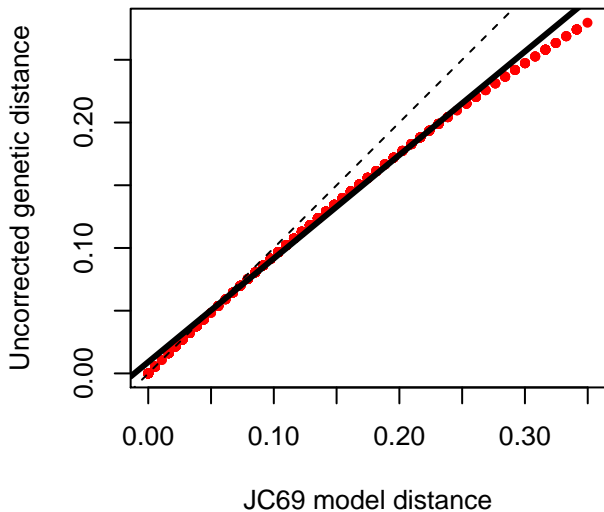

**rpl33 Saturation (1st Pos)**

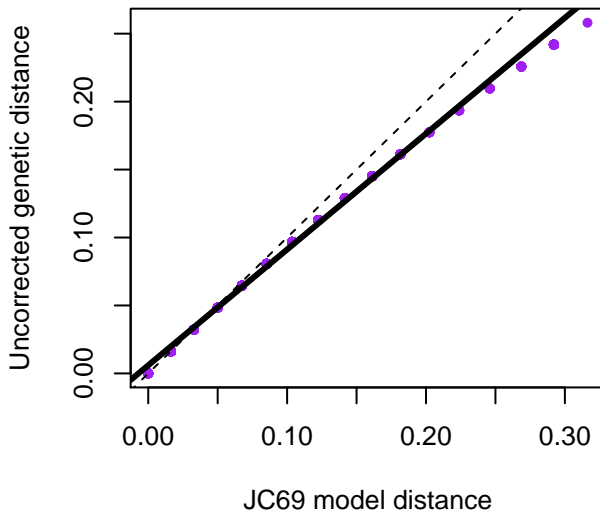

**rpl33 Saturation (2nd Pos)**

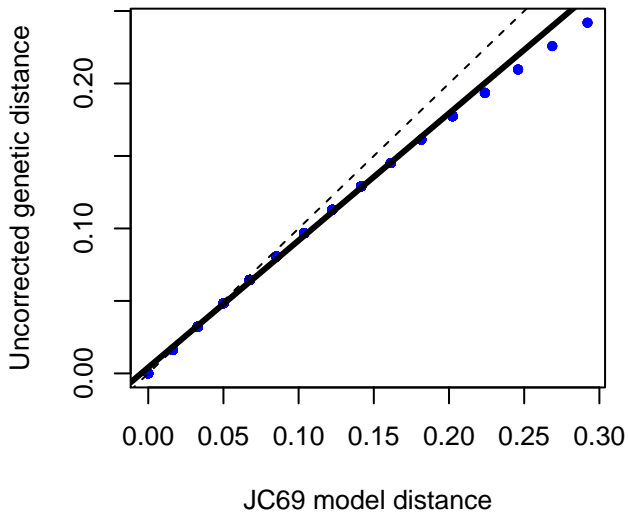

**rpl33 Saturation (3rd Pos)**

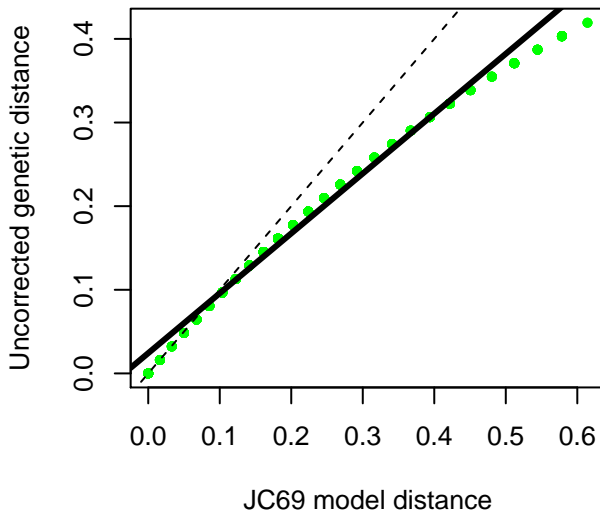

**rpl36 Saturation (All Bases)**

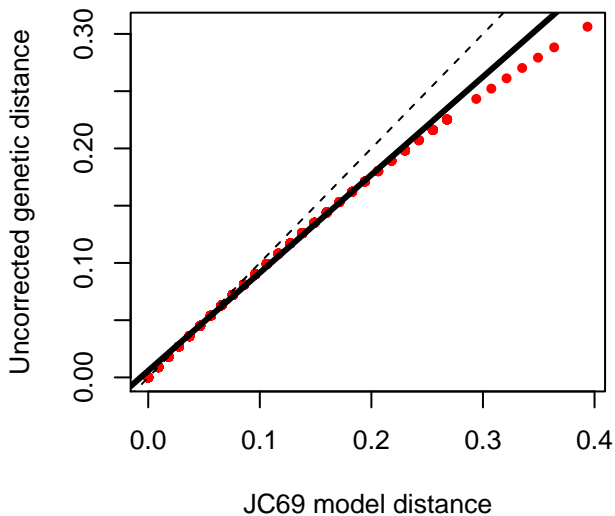

**rpl36 Saturation (1st Pos)**

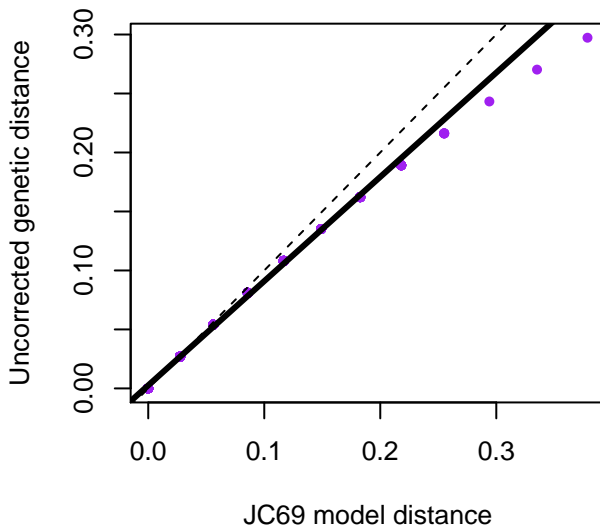

**rpl36 Saturation (2nd Pos)**

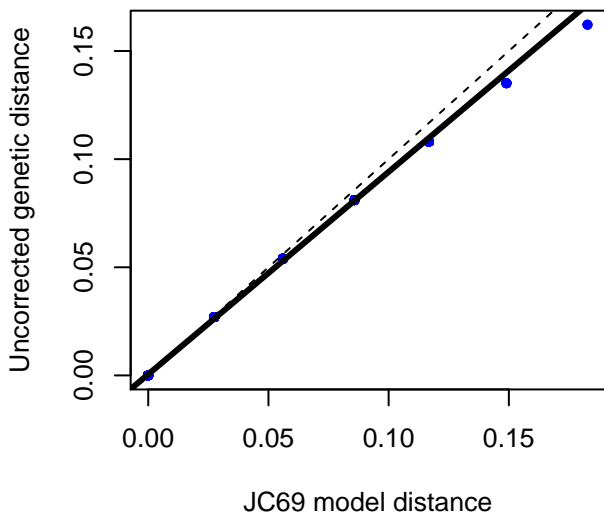

**rpl36 Saturation (3rd Pos)**

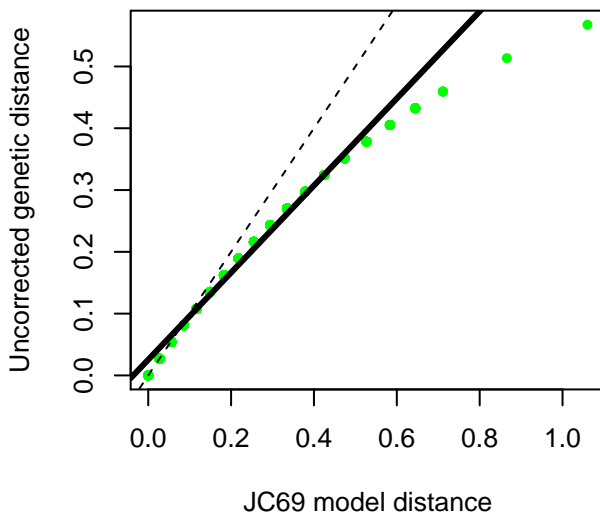

**rpoA Saturation (All Bases)**

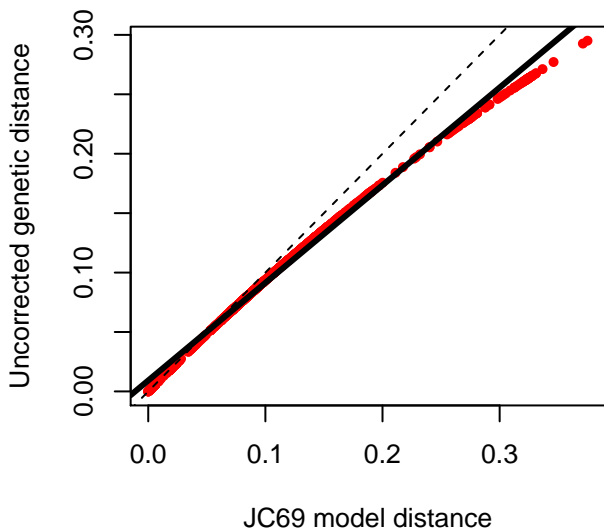

**rpoA Saturation (1st Pos)**

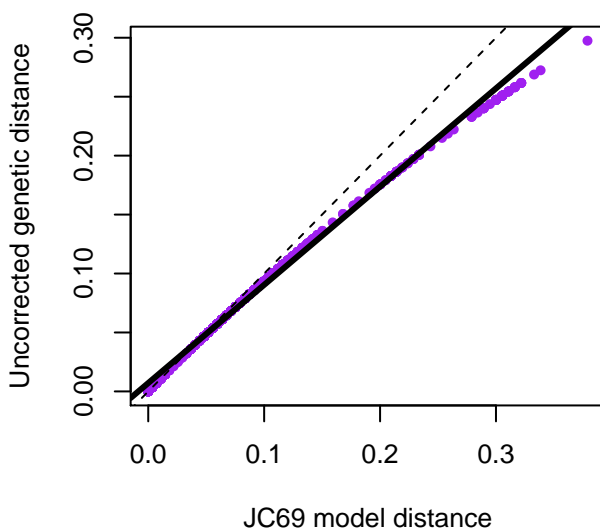

**rpoA Saturation (2nd Pos)**

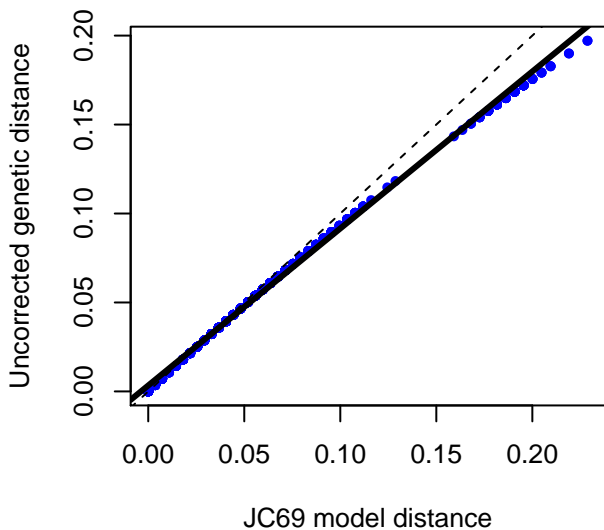

**rpoA Saturation (3rd Pos)**

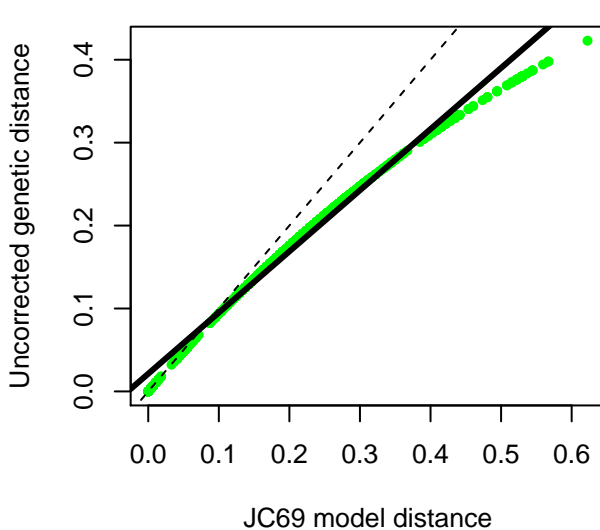

**rpoB Saturation (All Bases)**

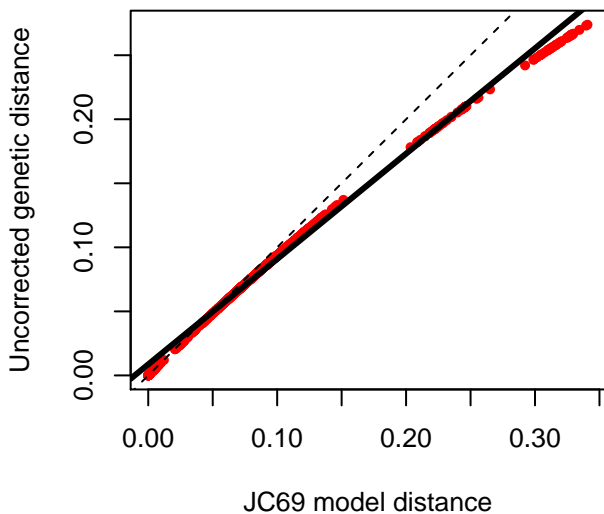

**rpoB Saturation (1st Pos)**

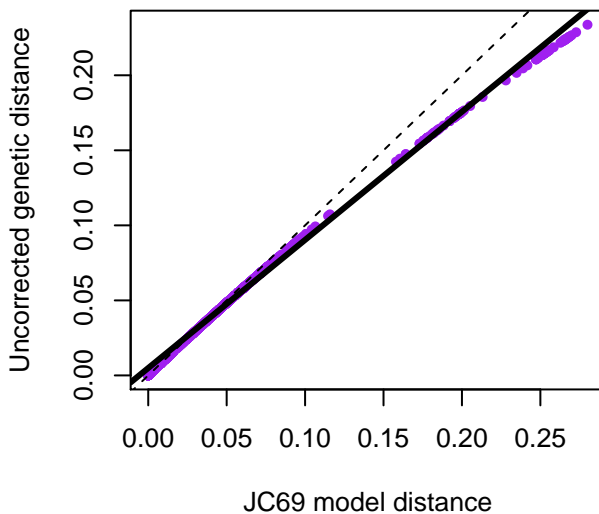

**rpoB Saturation (2nd Pos)**

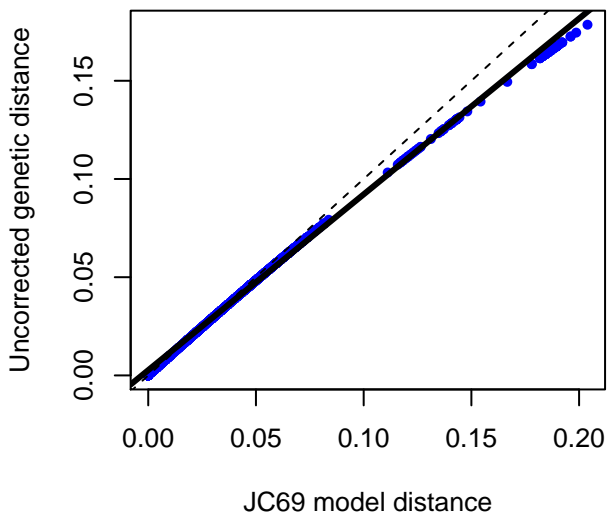

**rpoB Saturation (3rd Pos)**

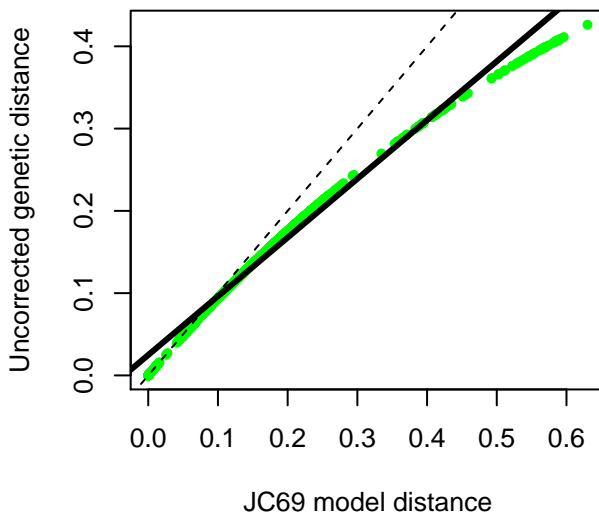

**rpoC1 Saturation (All Bases)**

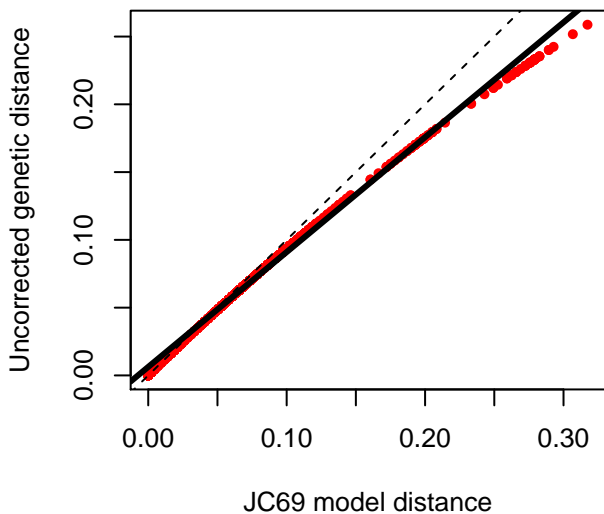

**rpoC1 Saturation (1st Pos)**

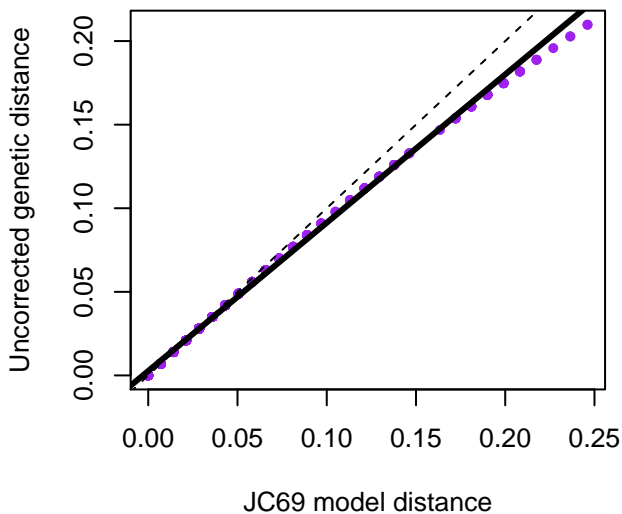

**rpoC1 Saturation (2nd Pos)**

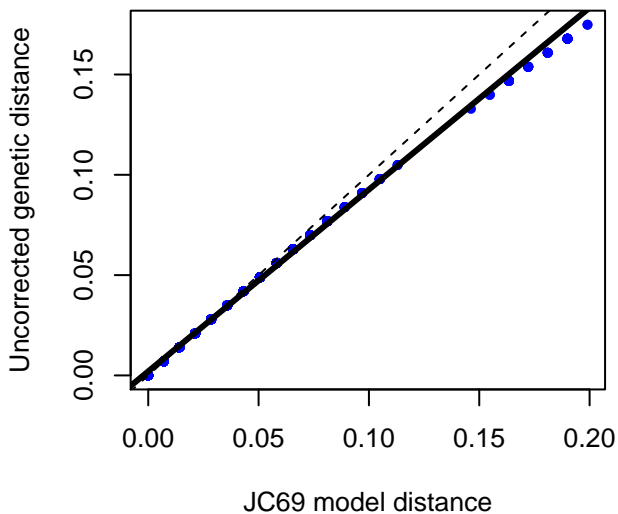

**rpoC1 Saturation (3rd Pos)**

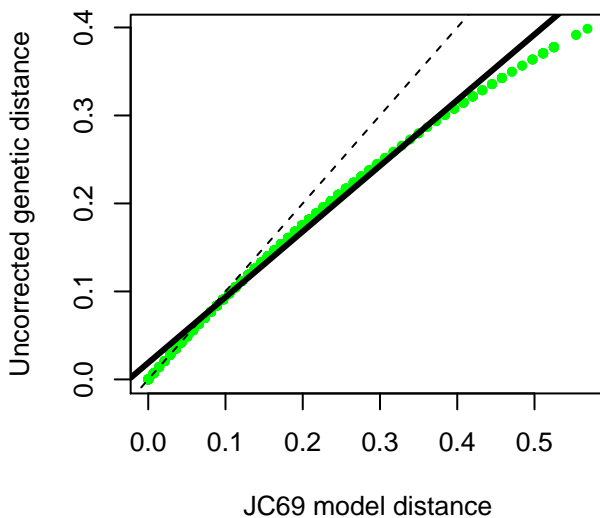

**rpoC2 Saturation (All Bases)**

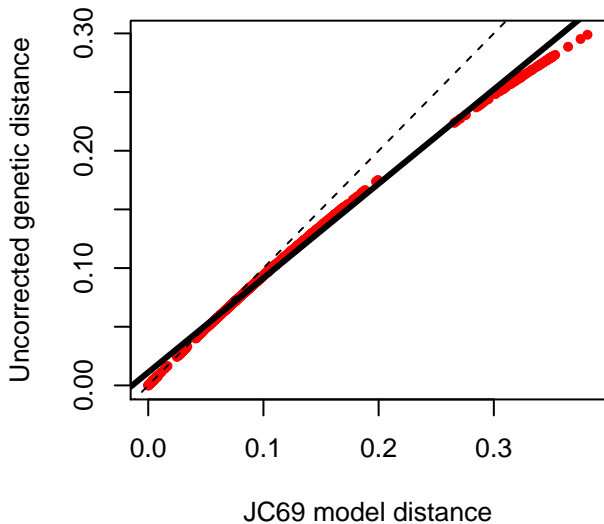

**rpoC2 Saturation (1st Pos)**

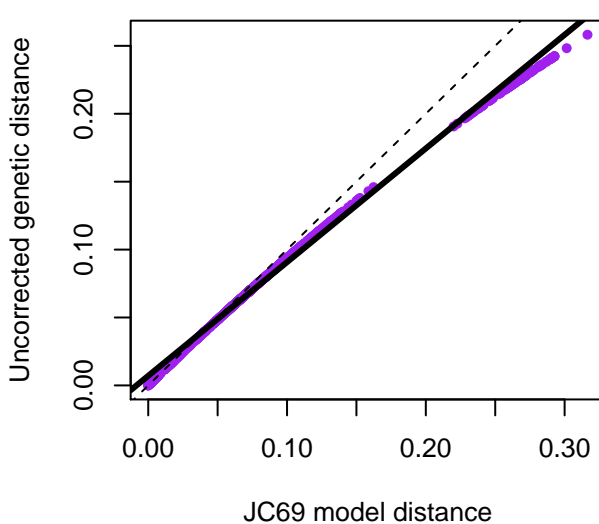

**rpoC2 Saturation (2nd Pos)**

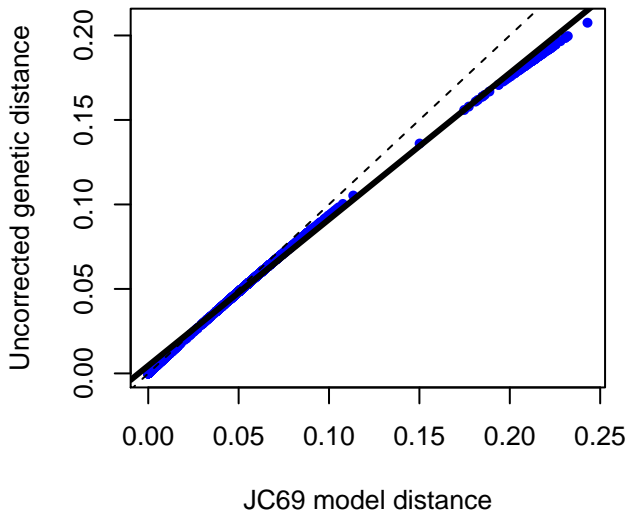

**rpoC2 Saturation (3rd Pos)**

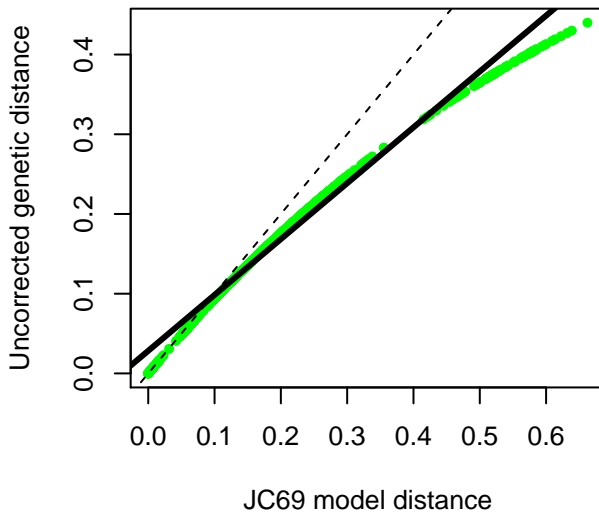

**rps11 Saturation (All Bases)**

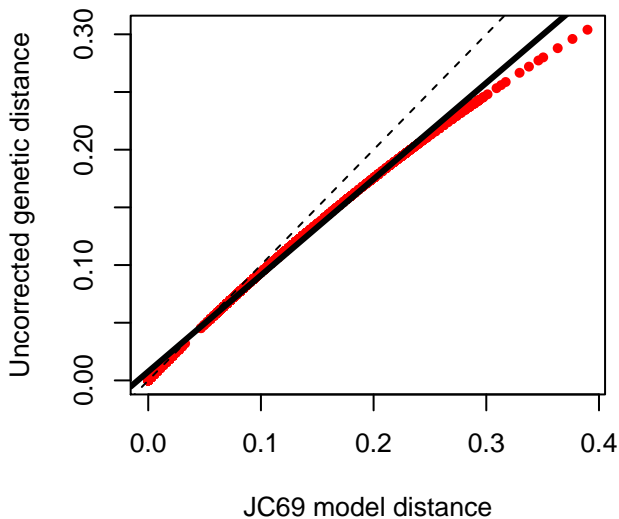

**rps11 Saturation (1st Pos)**

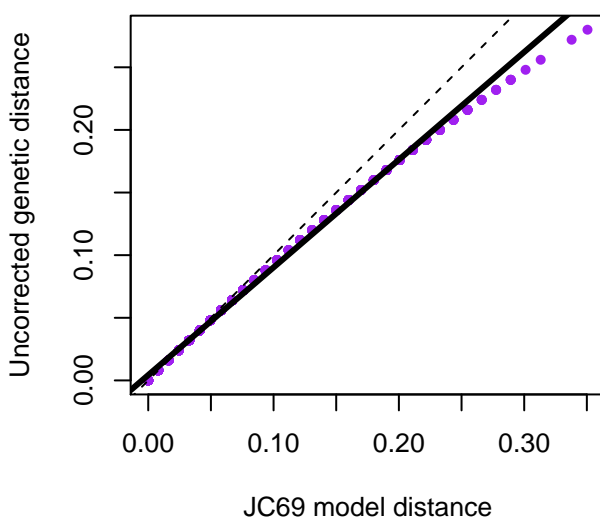

**rps11 Saturation (2nd Pos)**

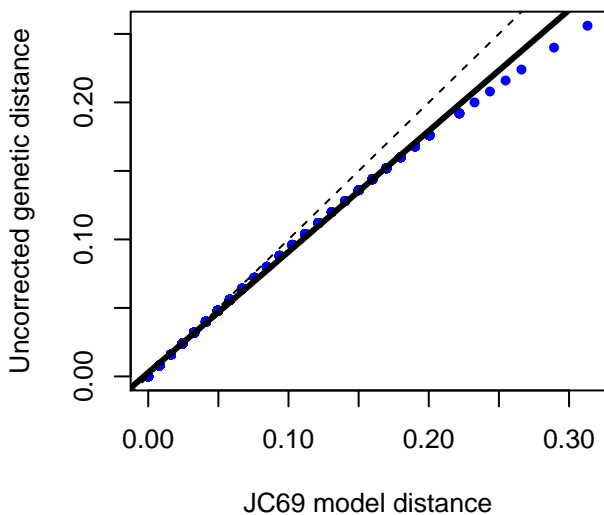

**rps11 Saturation (3rd Pos)**

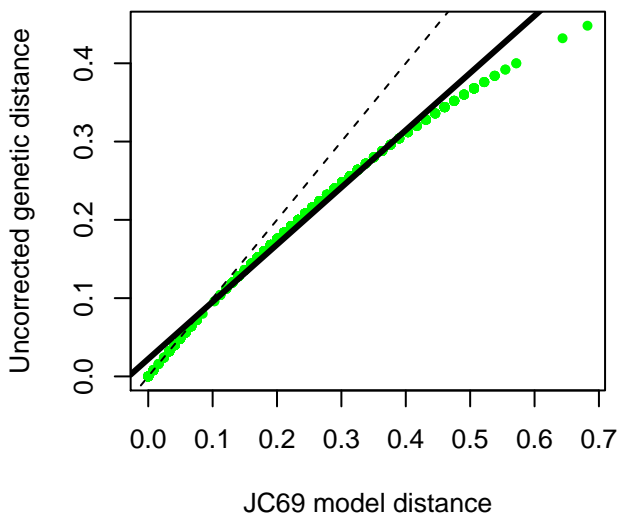



**rps12 Saturation (All Bases)**

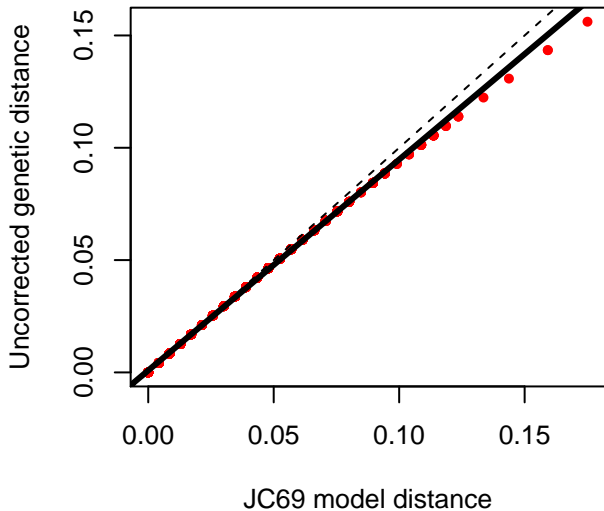

**rps12 Saturation (1st Pos)**

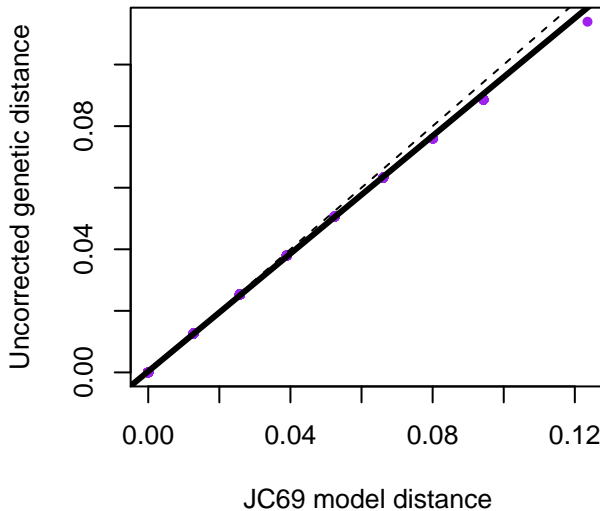

**rps12 Saturation (2nd Pos)**

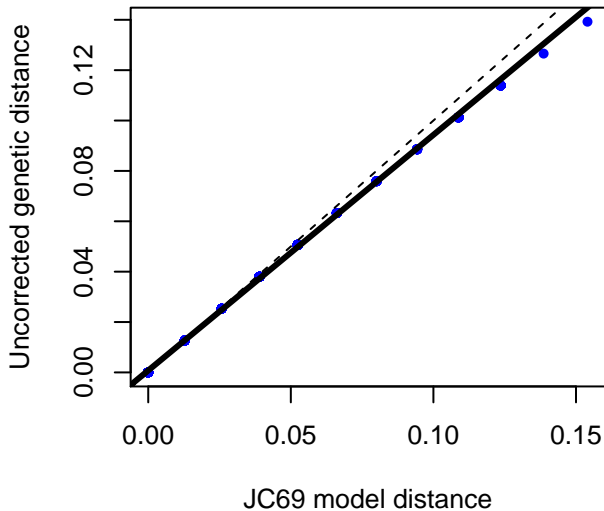

**rps12 Saturation (3rd Pos)**

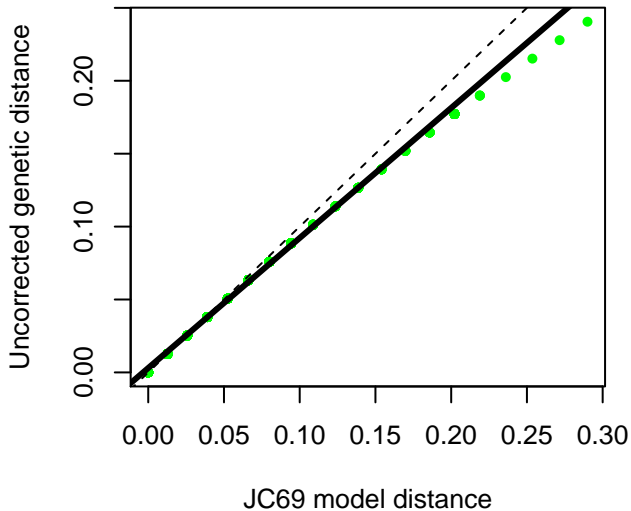

**rps14 Saturation (All Bases)**

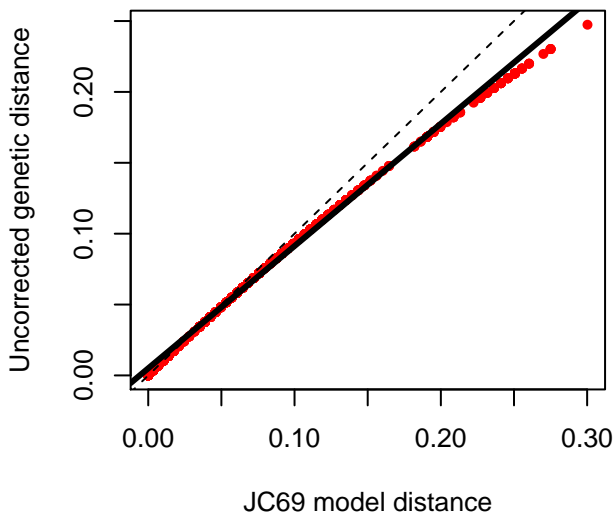

**rps14 Saturation (1st Pos)**

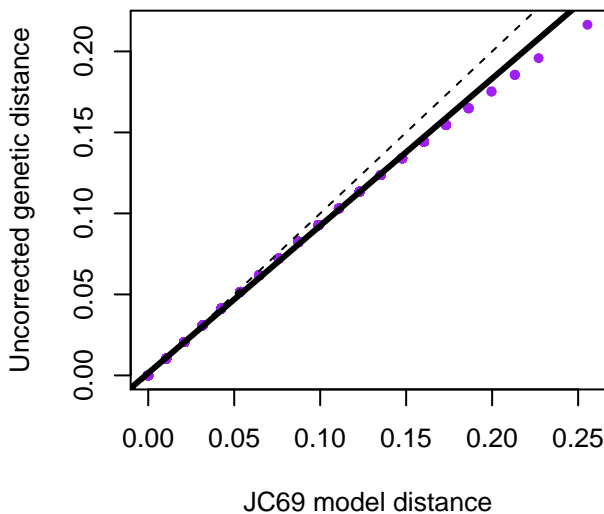

**rps14 Saturation (2nd Pos)**

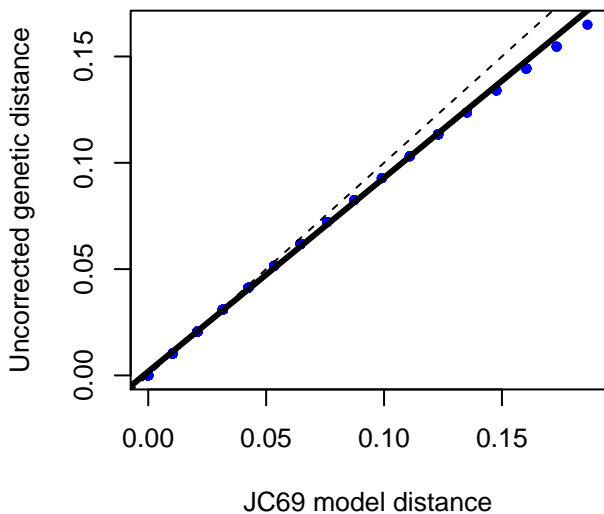

**rps14 Saturation (3rd Pos)**

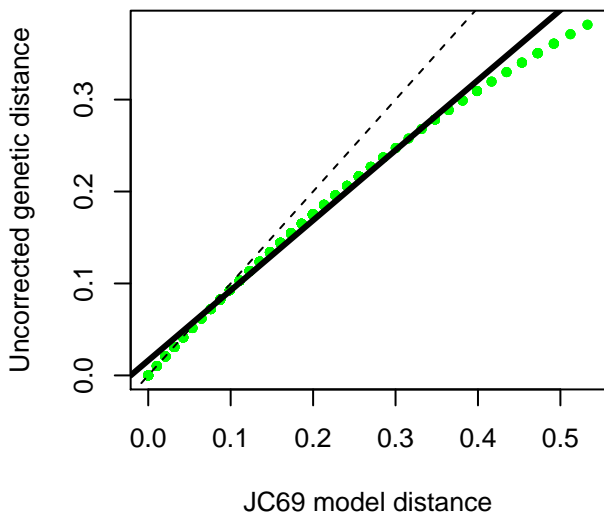

**rps15 Saturation (All Bases)**

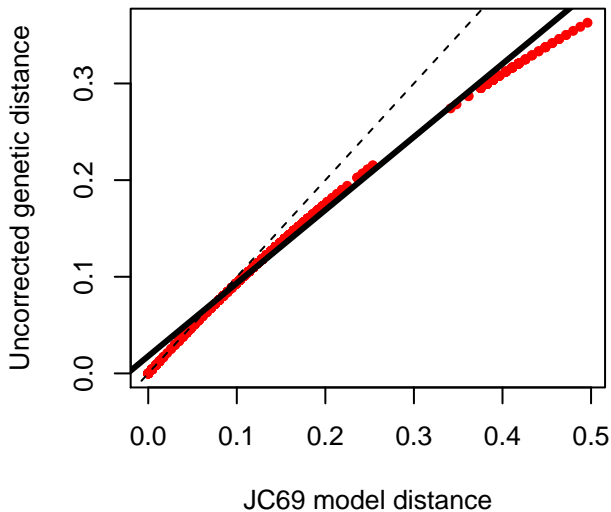

**rps15 Saturation (1st Pos)**

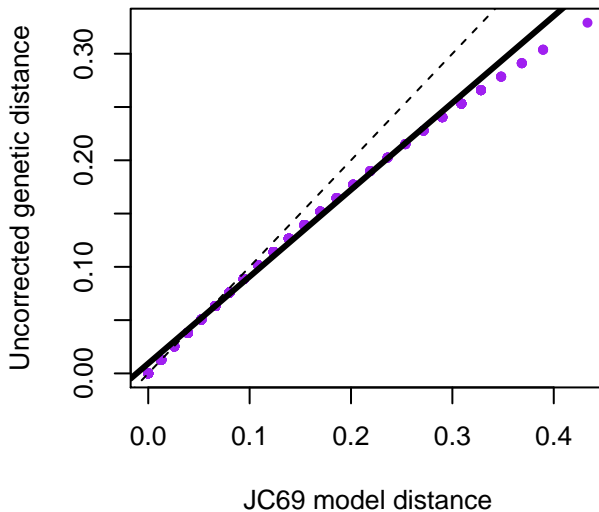

**rps15 Saturation (2nd Pos)**

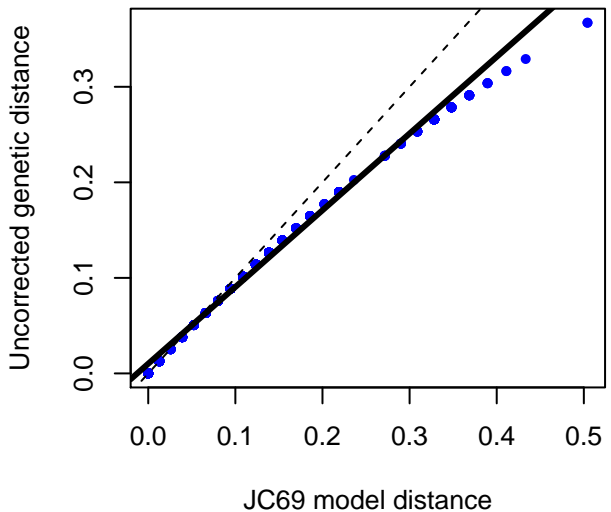

**rps15 Saturation (3rd Pos)**

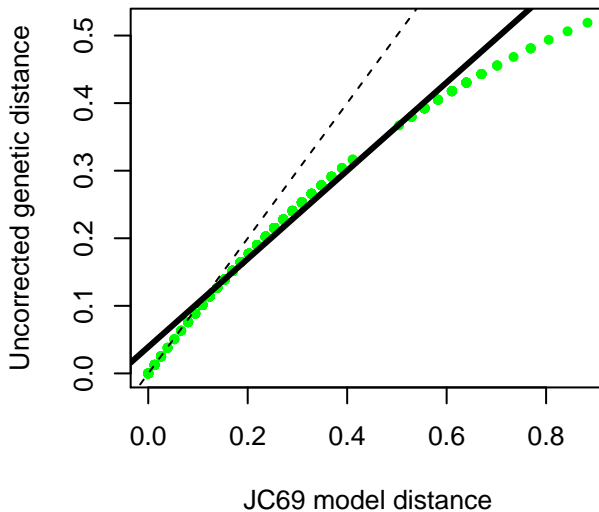

**rps16 Saturation (All Bases)**

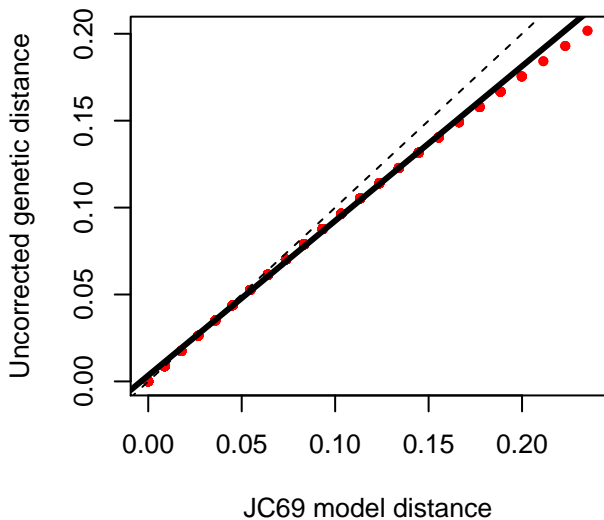

**rps16 Saturation (1st Pos)**

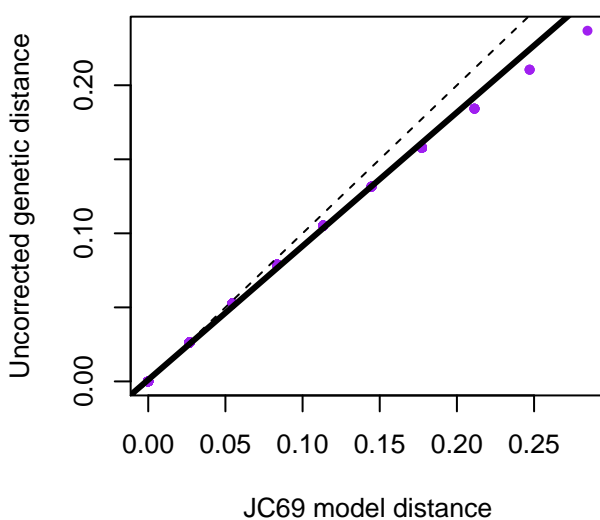

**rps16 Saturation (2nd Pos)**

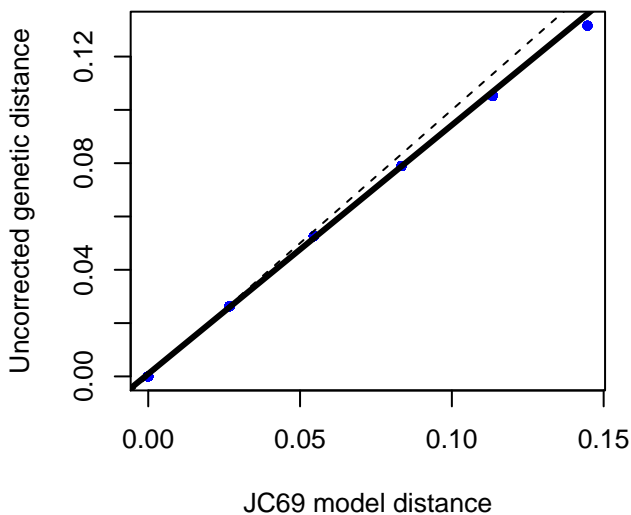

**rps16 Saturation (3rd Pos)**

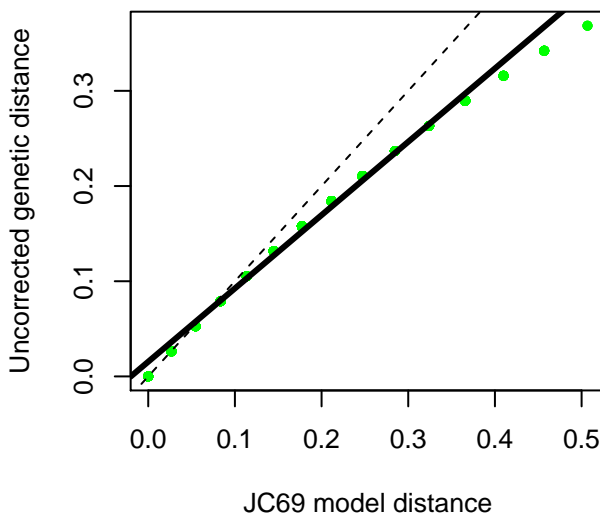

**rps18 Saturation (All Bases)**

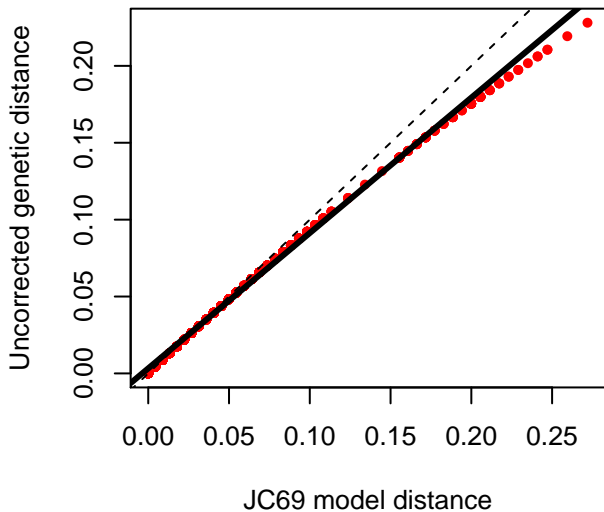

**rps18 Saturation (1st Pos)**

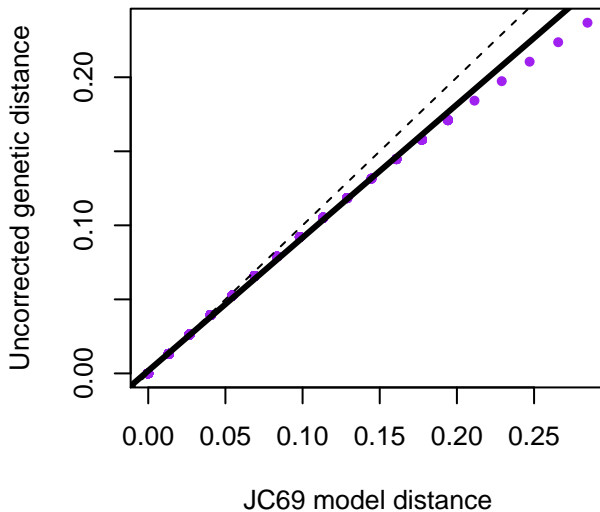

**rps18 Saturation (2nd Pos)**

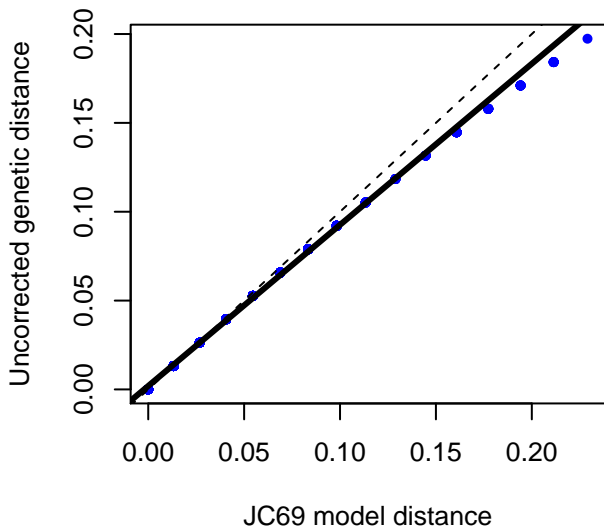

**rps18 Saturation (3rd Pos)**

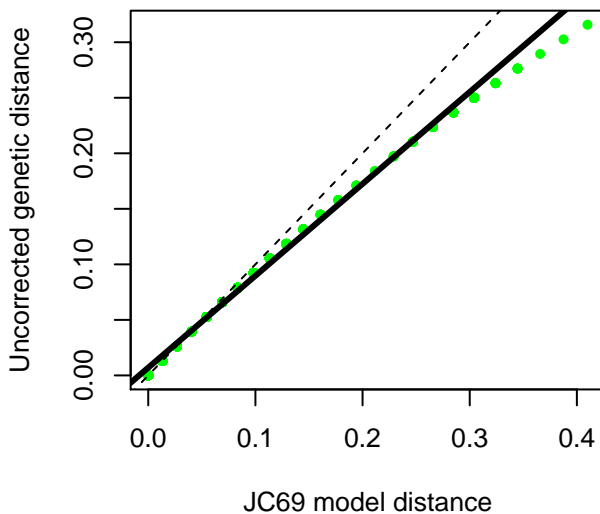

**rps19 Saturation (All Bases)**

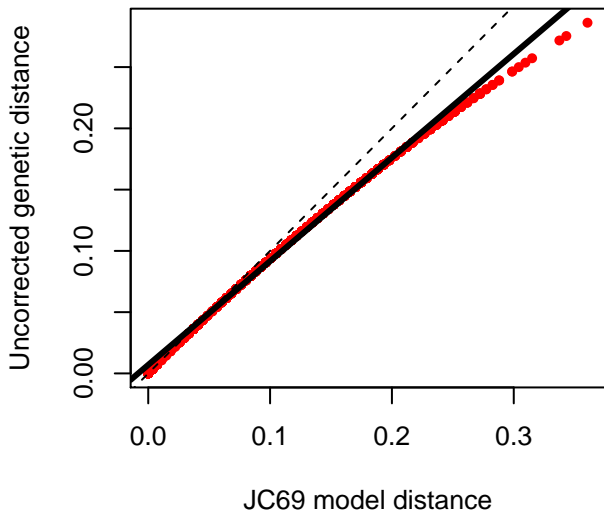

**rps19 Saturation (1st Pos)**

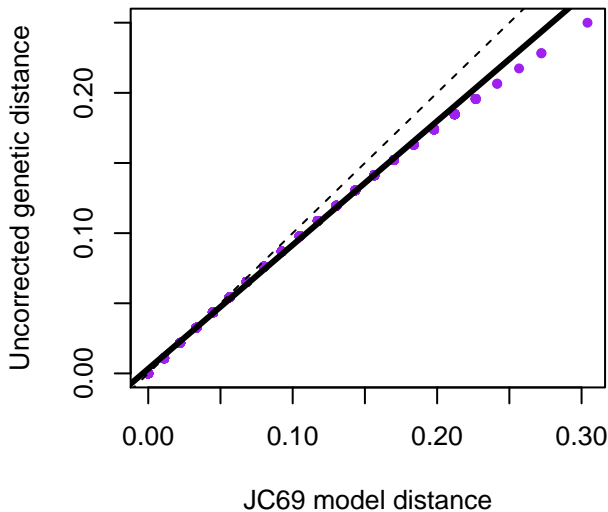

**rps19 Saturation (2nd Pos)**

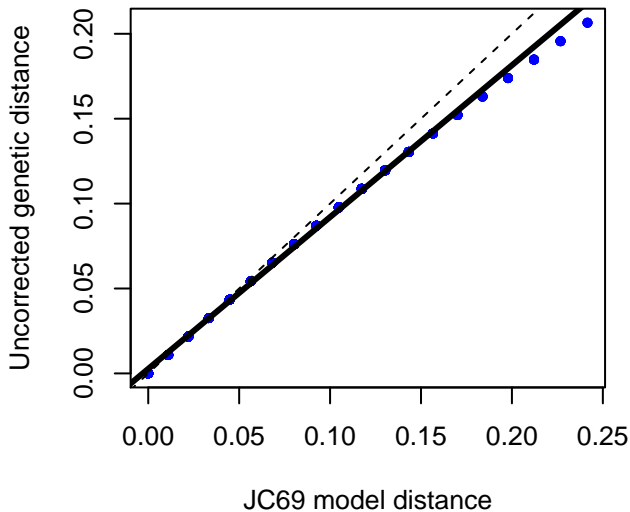

**rps19 Saturation (3rd Pos)**

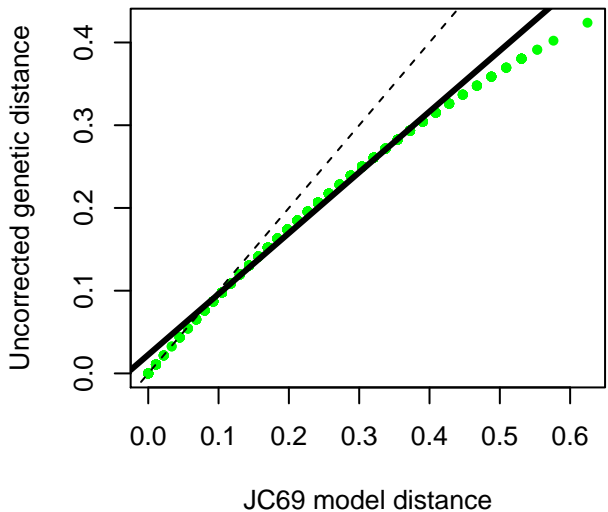

**rps2 Saturation (All Bases)**

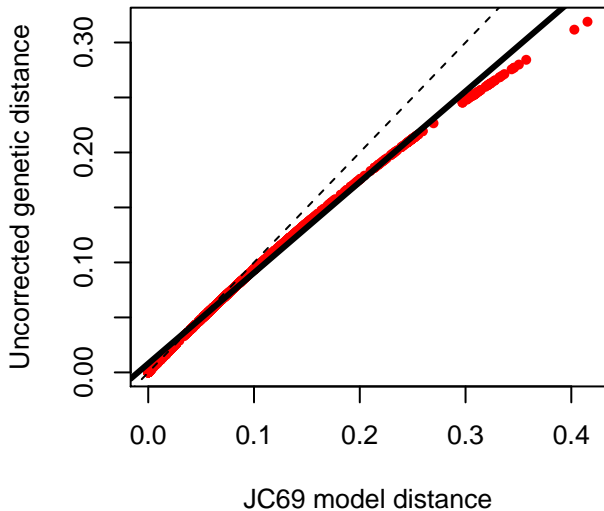

**rps2 Saturation (1st Pos)**

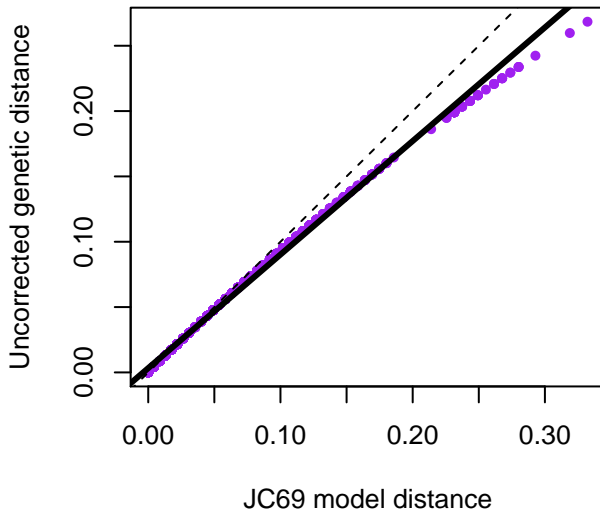

**rps2 Saturation (2nd Pos)**

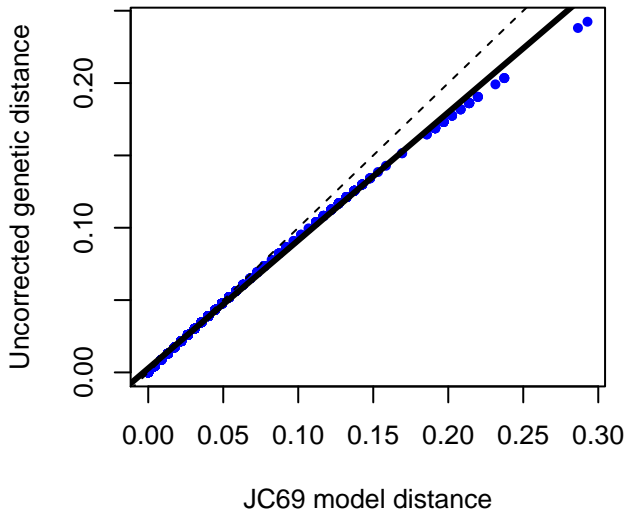

**rps2 Saturation (3rd Pos)**

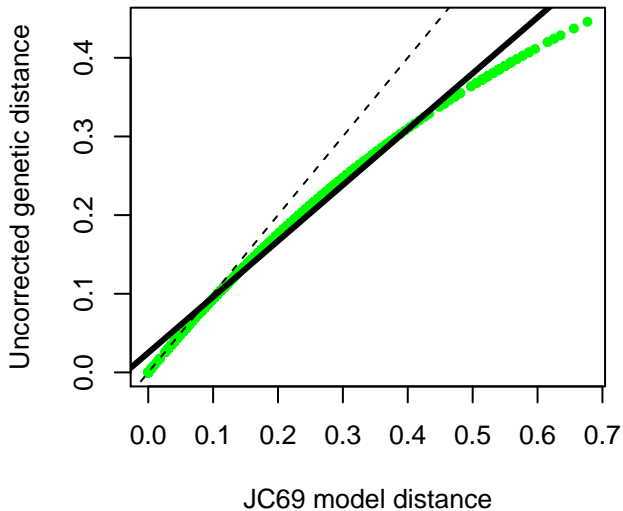

**rps3 Saturation (All Bases)**

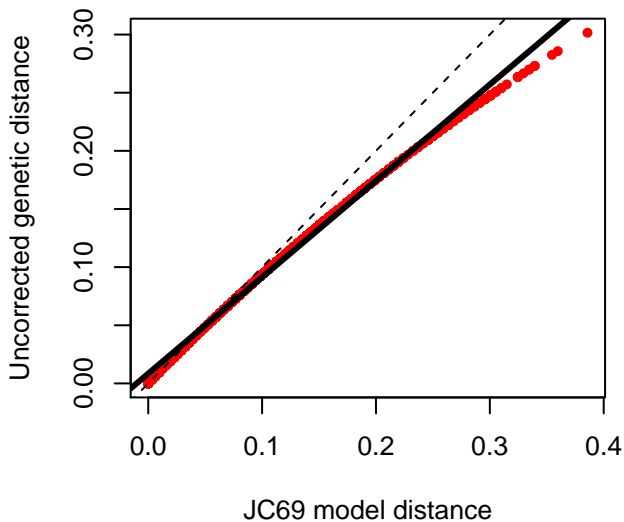

**rps3 Saturation (1st Pos)**

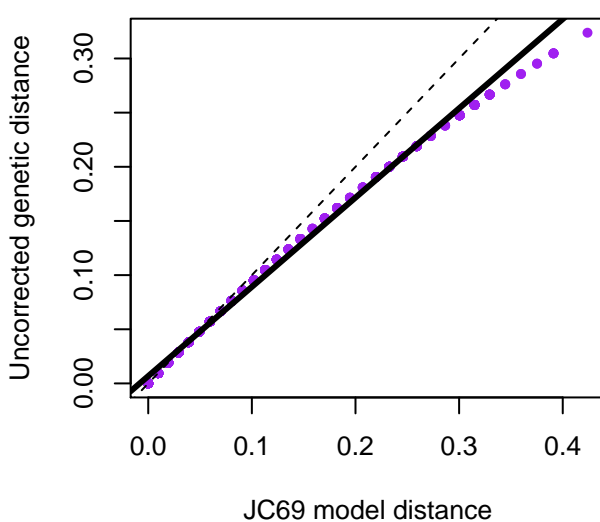

**rps3 Saturation (2nd Pos)**

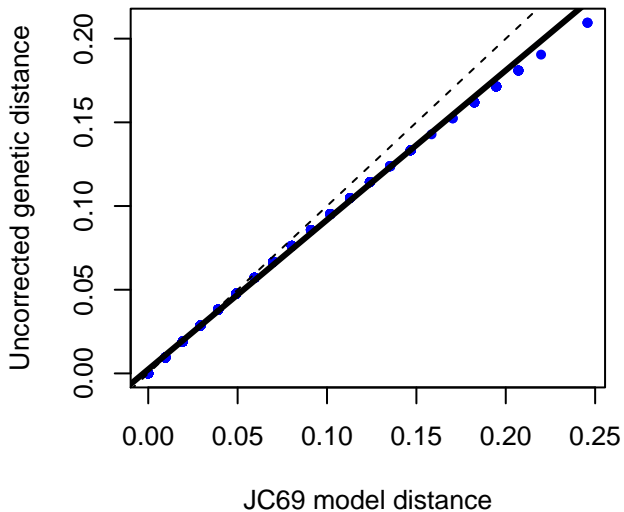

**rps3 Saturation (3rd Pos)**

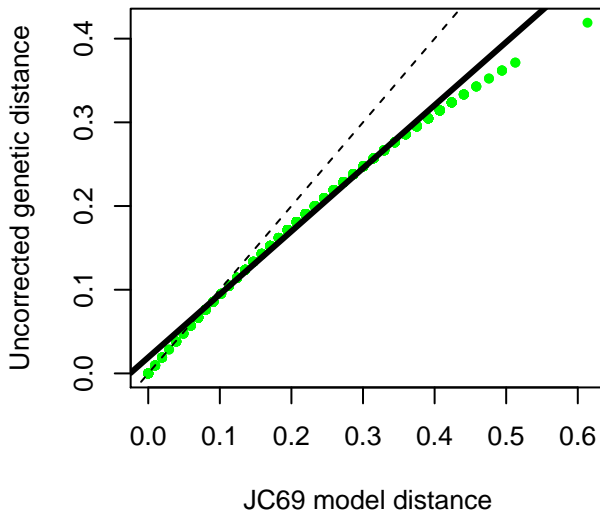



**rps4 Saturation (All Bases)**

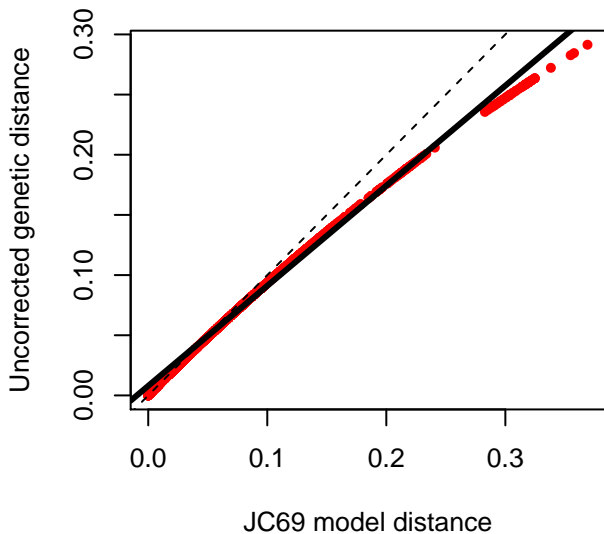

**rps4 Saturation (1st Pos)**

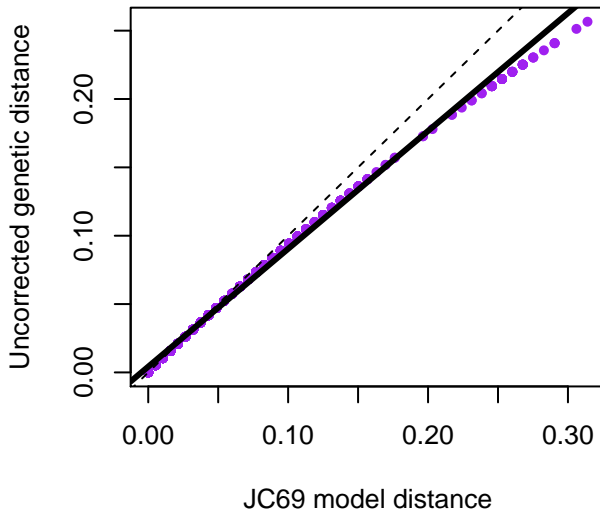

**rps4 Saturation (2nd Pos)**

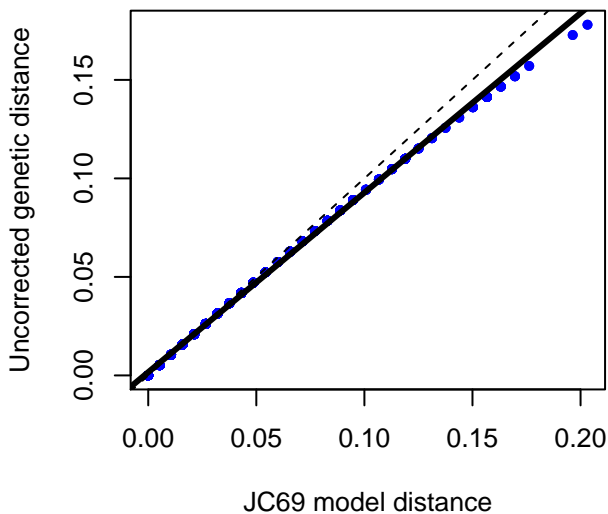

**rps4 Saturation (3rd Pos)**

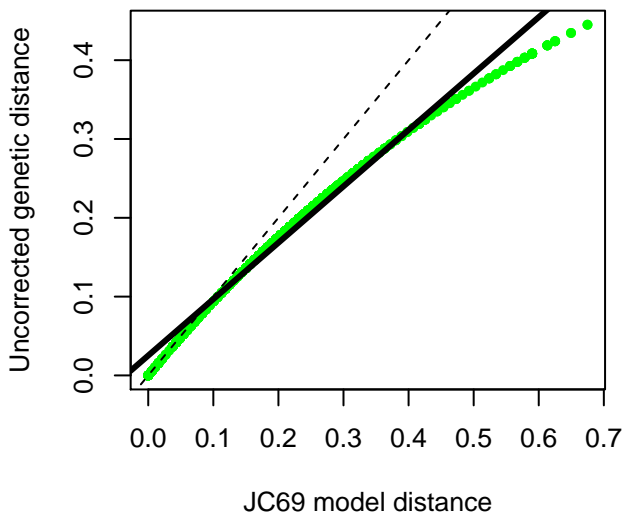

**rps7 Saturation (All Bases)**

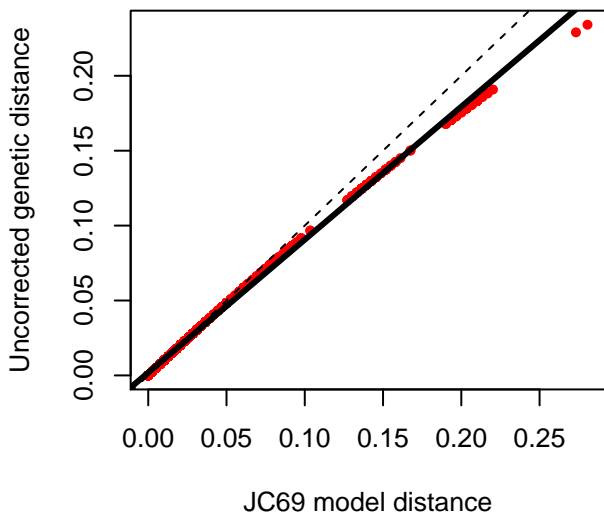

**rps7 Saturation (1st Pos)**

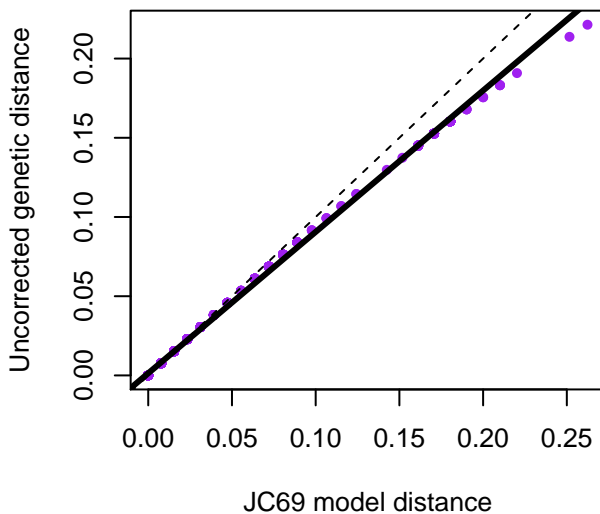

**rps7 Saturation (2nd Pos)**

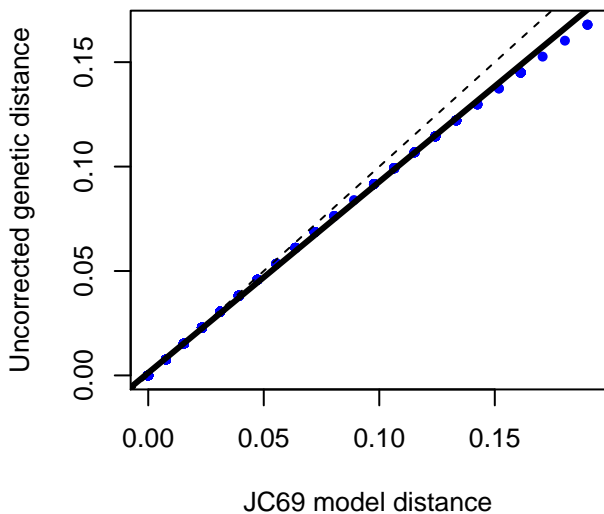

**rps7 Saturation (3rd Pos)**

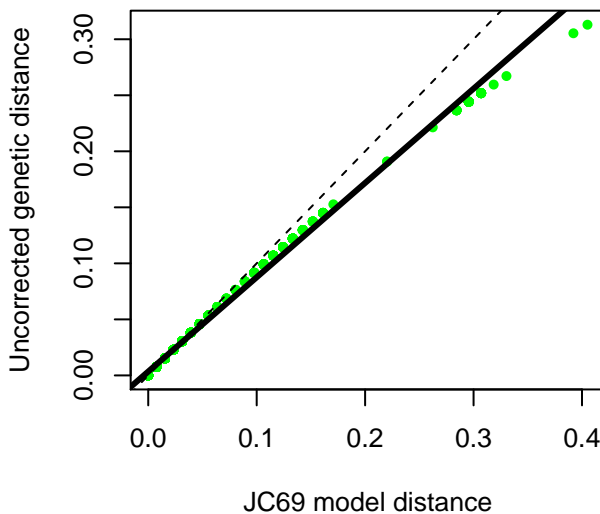

**rps8 Saturation (All Bases)**

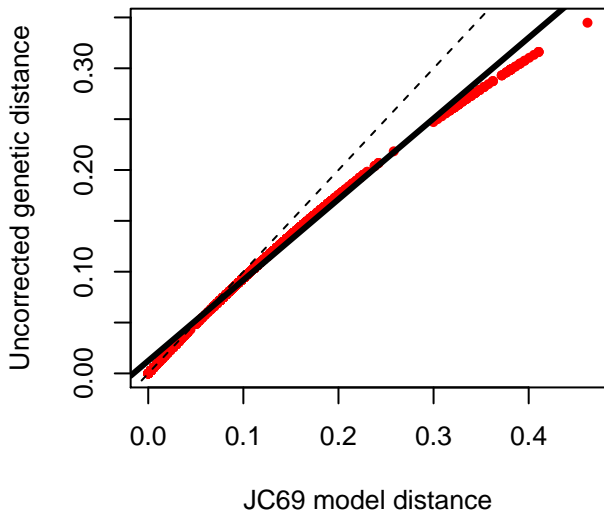

**rps8 Saturation (1st Pos)**

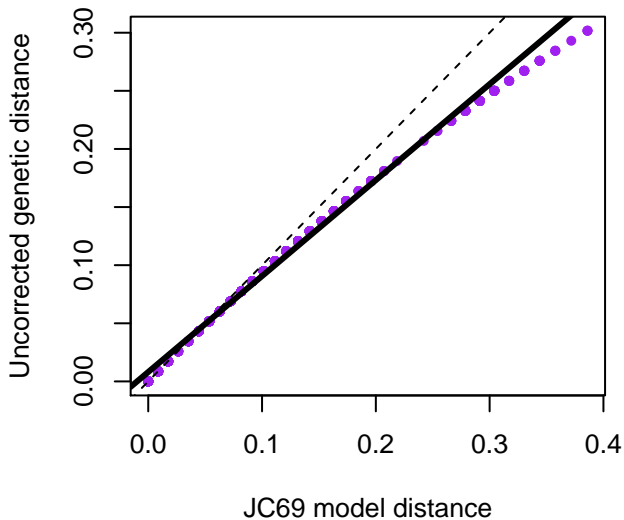

**rps8 Saturation (2nd Pos)**

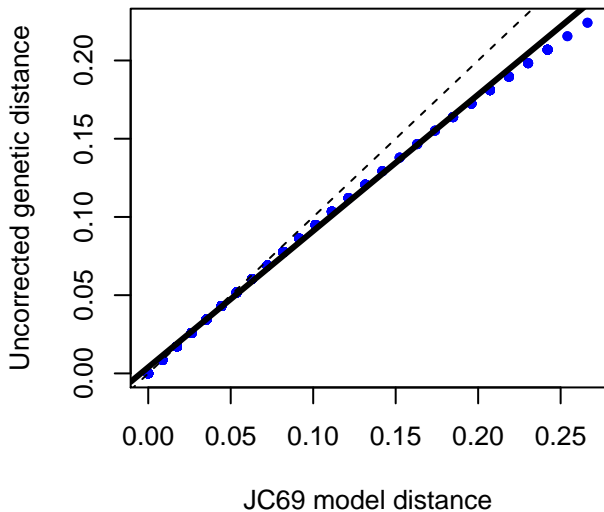

**rps8 Saturation (3rd Pos)**

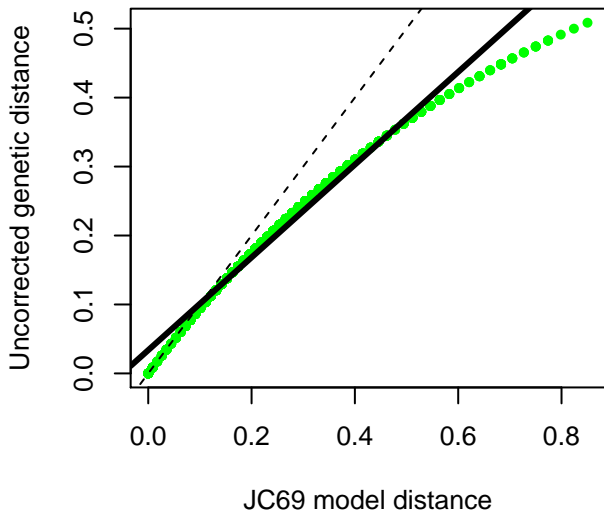

**ycf1 Saturation (All Bases)**

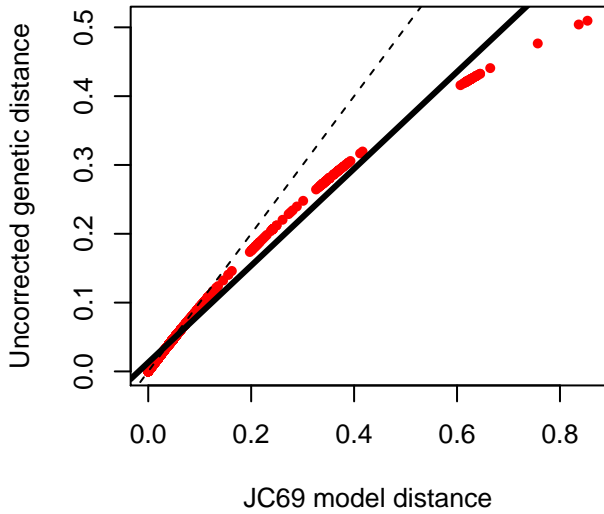

**ycf1 Saturation (1st Pos)**

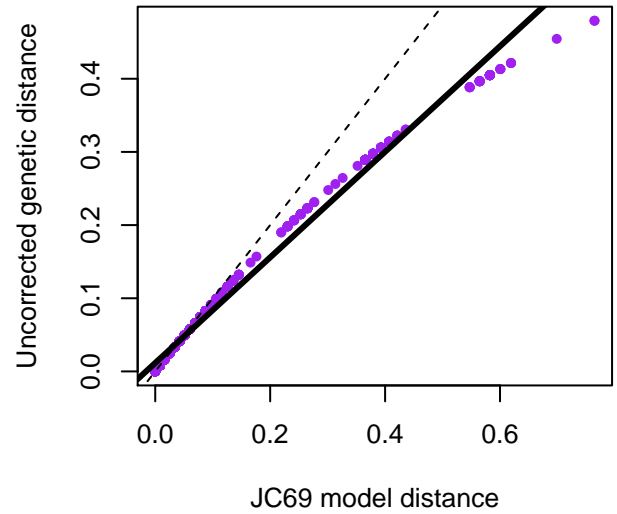

**ycf1 Saturation (2nd Pos)**

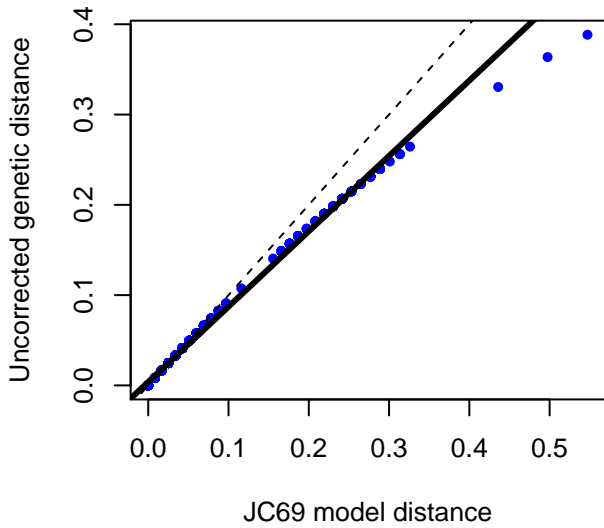

**ycf1 Saturation (3rd Pos)**

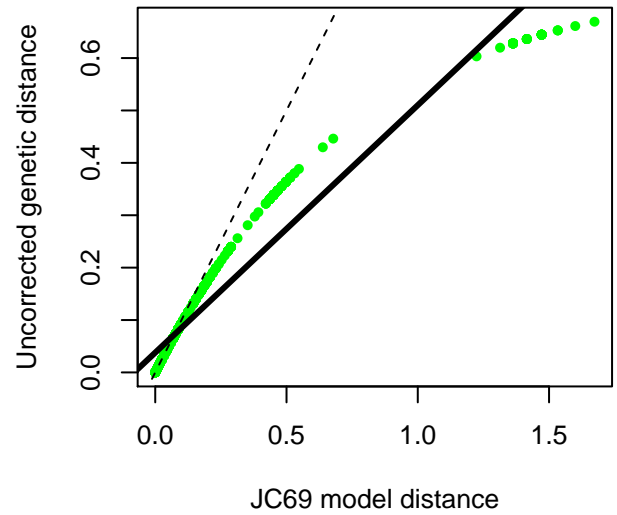

**ycf2 Saturation (All Bases)**

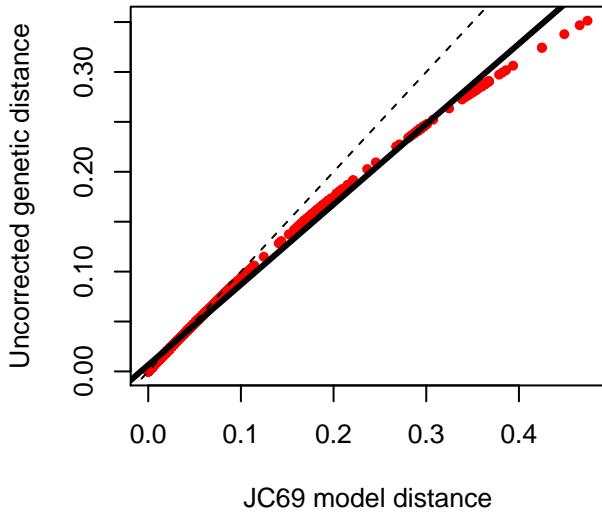

**ycf2 Saturation (1st Pos)**

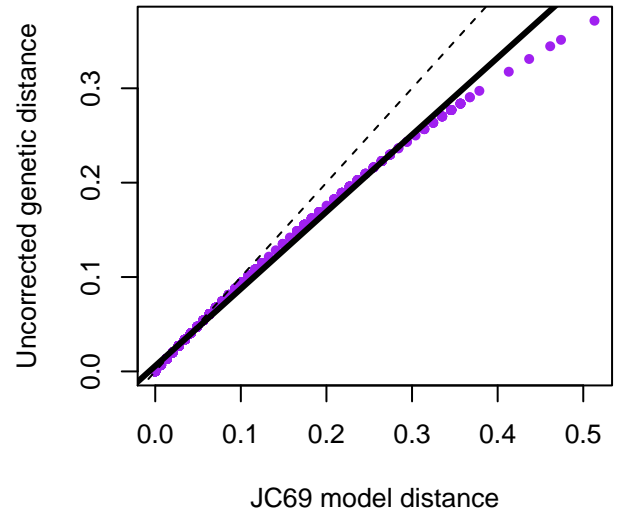

**ycf2 Saturation (2nd Pos)**

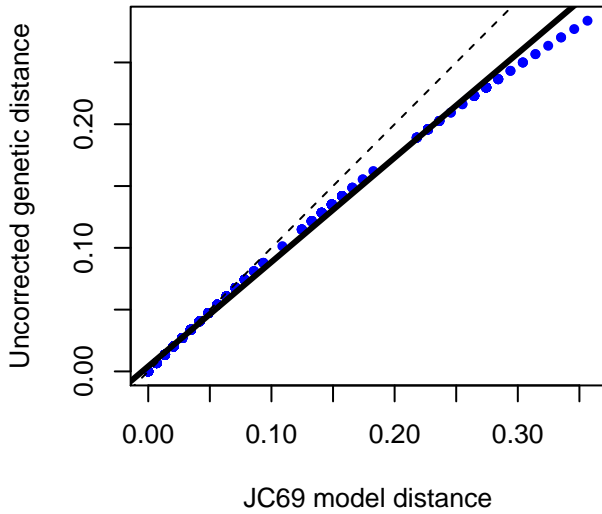

**ycf2 Saturation (3rd Pos)**

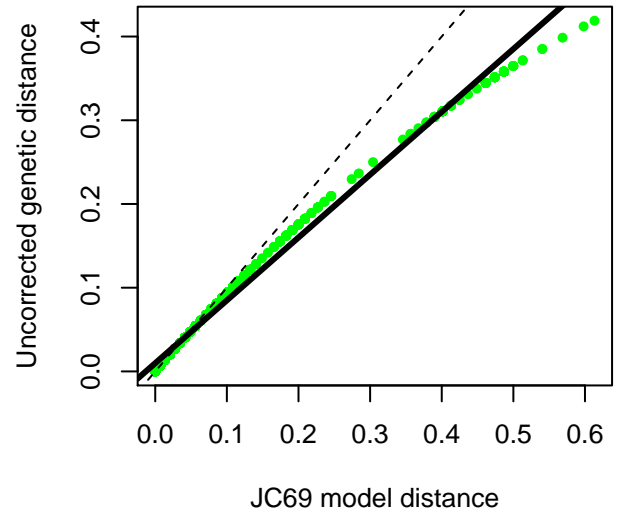

**ycf3 Saturation (All Bases)**

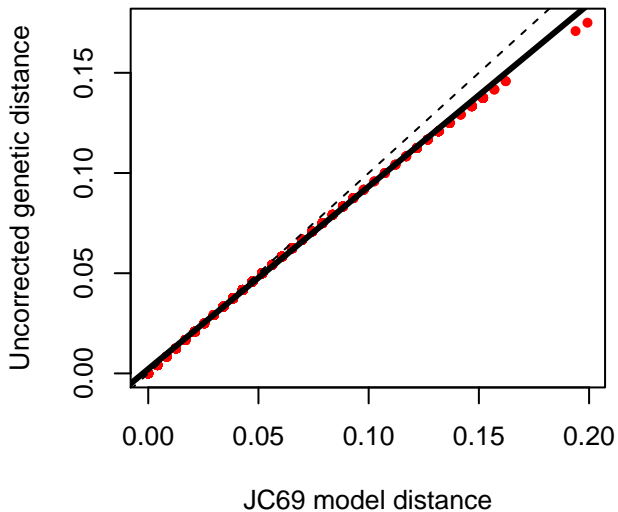

**ycf3 Saturation (1st Pos)**

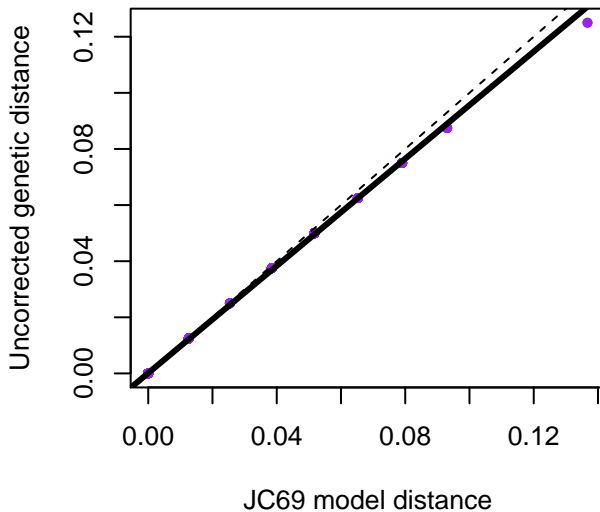

**ycf3 Saturation (2nd Pos)**

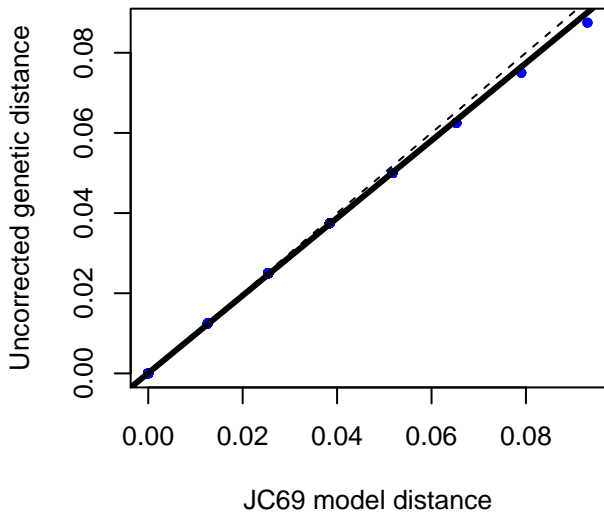

**ycf3 Saturation (3rd Pos)**

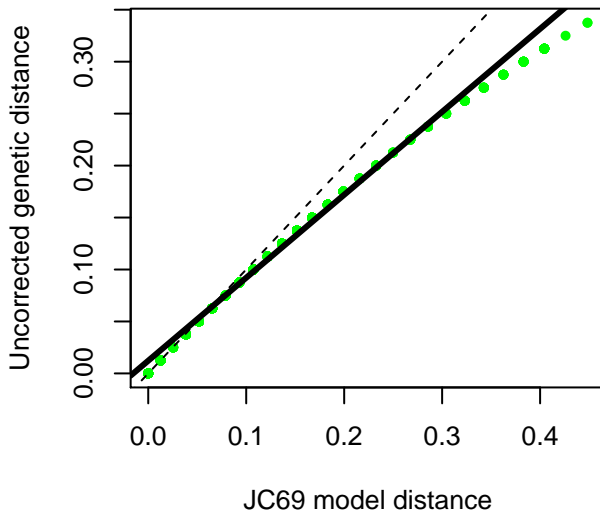

**ycf4 Saturation (All Bases)**

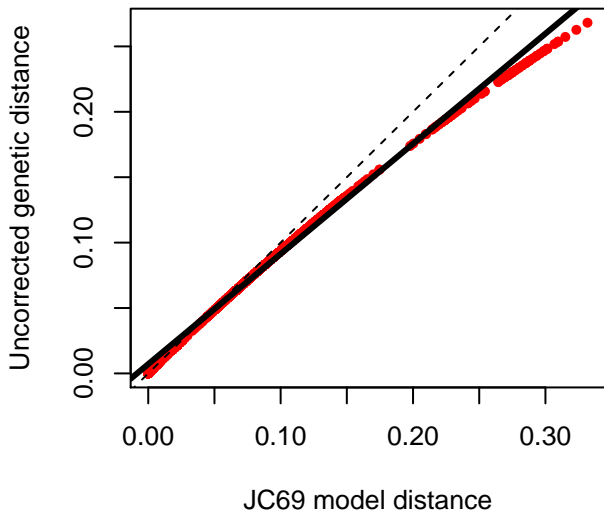

**ycf4 Saturation (1st Pos)**

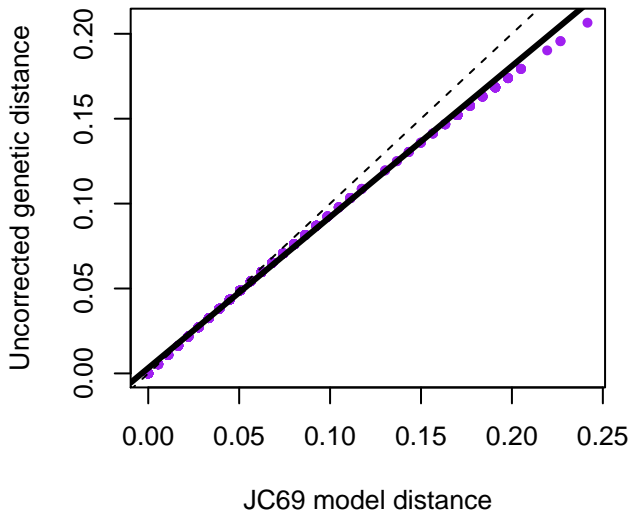

**ycf4 Saturation (2nd Pos)**

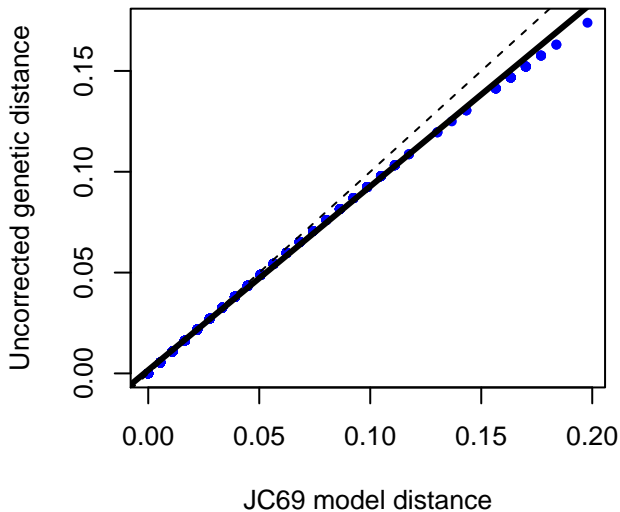

**ycf4 Saturation (3rd Pos)**

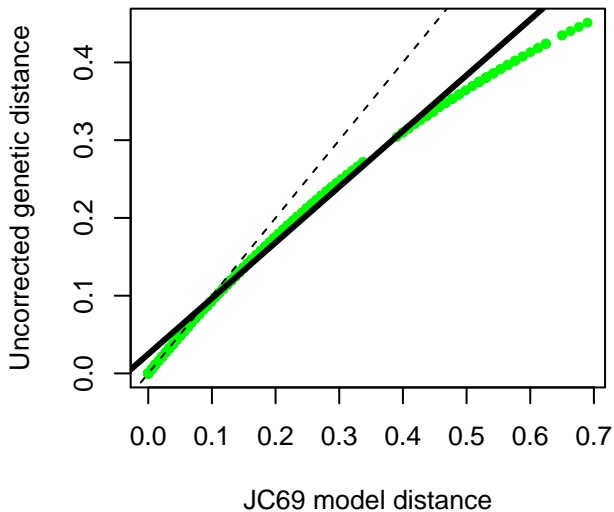

Supplement: FigureS5_SaturationPlots.pdf [file FigureS5_SaturationPlots.pdf]
