# Supplementary material for: Characterizing gene tree conflict in plastome-inferred phylogenies
Source: PeerJ. 2019 Sep 24;7:e7747. doi: 10.7717/peerj.7747 (PMC6764362; doi:10.7717/peerj.7747)
Supplement: Table S6 — Results of the analysis of MAFFT aligned nucleotide data, including the taxon coverage, the total nodes that could be support, and the ones that could not as a result of taxon coverage. This is shown both with and without support and is presented for all the time slices analyzed. The different correlates, tree length, variance and alignment length are given in the final 3 columns. [file peerj-07-7747-s011.xlsx]

## Sheet: Mafft_Nuc_Results
Table S6: Results of the analysis of MAFFT aligned nucleotide data, including the taxon coverage, the total nodes that could be support, and the ones that could not as a result of taxon coverage. This is shown both with and without support and is presented for all the time slices analyzed. The different correlates, tree length, variance and alignment length are given in the final 3 columns.
GeneName	TotalTaxa	TotalSupportableNodes	TotalNodesSupported	TotalNotSupported	120-150S	120-150NS	90-120S	90-120NS	60-90S	60-90NS	30-60S	30-60NS	0-30S	0-30NS	TotalSupportedBs	TotalNoSupportBs	120-150Sbs	150-120NSbs	90-120Sbs	90-120NSbs	60-90Sbs	60-90NSbs	30-60Sbs	30-60NSbs	0-30Sbs	0-30NSbs	length	variance	Alignment Lengths
accD	48	45	25	20	8	3	6	1	4	3	4	5	3	8	13	32	2	9	3	4	3	4	3	6	2	9	1.81948	0.00237257	2525
atpA	53	50	28	22	8	4	3	4	8	2	4	5	5	7	21	29	6	6	2	5	6	4	4	5	3	9	1.32858	0.00151699	1546
atpB	53	50	32	18	8	4	5	2	7	3	6	3	6	6	24	26	7	5	3	4	5	5	4	5	5	7	1.13375	0.00108208	1506
atpE	53	50	27	23	8	4	2	5	8	2	6	3	3	9	13	37	6	6	0	7	4	6	1	8	2	10	1.50811	0.0016002	423
atpF	52	49	27	22	6	6	3	4	8	2	5	3	5	7	19	30	4	8	1	6	8	2	4	4	2	10	1.44989	0.00151818	654
atpH	53	50	20	30	8	4	1	6	5	5	3	6	3	9	4	46	1	11	0	7	2	8	0	9	1	11	0.767823	0.00084737	246
atpI	52	49	26	23	5	7	5	2	8	2	4	4	4	8	13	36	3	9	2	5	5	5	2	6	1	11	1.03278	0.000680007	750
ccsA	50	47	32	15	8	4	4	3	7	1	7	1	6	6	20	27	5	7	4	3	6	2	3	5	2	10	2.36325	0.00515099	1077
cemA	53	50	29	21	8	4	3	4	8	2	6	3	4	8	18	32	7	5	2	5	4	6	2	7	3	9	1.60318	0.0017844	810
clpP	50	47	14	33	5	7	0	7	2	7	5	3	2	9	2	45	0	12	0	7	1	8	1	7	0	11	2.70986	0.021999	840
infA	46	43	12	31	2	8	2	5	3	3	4	5	1	10	2	41	1	9	0	7	1	5	0	9	0	11	1.16963	0.00148788	276
matK	53	50	37	13	11	1	5	2	8	2	7	2	6	6	29	21	6	6	5	2	8	2	6	3	4	8	2.48468	0.0034178	1758
ndhA	51	48	30	18	7	4	5	2	9	1	5	3	4	8	24	24	6	5	3	4	8	2	3	5	4	8	1.45973	0.00129672	1149
ndhB	50	47	15	32	7	4	1	6	2	8	4	4	1	10	11	36	6	5	1	6	1	9	2	6	1	10	0.233223	8.50675e-05	1632
ndhC	52	49	19	30	4	7	1	6	5	5	7	2	2	10	9	40	1	10	1	6	3	7	3	6	1	11	0.891709	0.00106023	408
ndhD	52	49	34	15	10	1	4	3	8	2	7	2	5	7	26	23	10	1	3	4	6	4	3	6	4	8	1.73974	0.00224654	1630
ndhE	52	49	21	28	4	7	5	2	5	5	5	4	2	10	10	39	2	9	0	7	3	7	4	5	1	11	1.26018	0.00299624	306
ndhF	49	46	41	5	9	2	7	0	7	1	7	1	11	1	31	15	5	6	7	0	7	1	5	3	7	5	2.6831	0.00401088	2352
ndhG	52	49	25	24	6	5	2	5	7	3	4	5	6	6	16	33	5	6	0	7	5	5	3	6	3	9	1.37721	0.00200674	543
ndhH	50	47	27	20	8	3	4	3	5	3	4	5	6	6	19	28	7	4	3	4	4	4	2	7	3	9	1.23746	0.00127026	1194
ndhI	51	48	23	25	8	3	3	4	6	4	3	5	3	9	13	35	3	8	2	5	4	6	3	5	1	11	1.25783	0.00110593	555
ndhJ	52	49	27	22	6	5	4	3	7	3	5	4	5	7	16	33	4	7	2	5	4	6	2	7	4	8	0.96007	0.000785613	522
ndhK	51	48	15	33	5	6	0	7	5	4	1	8	4	8	11	37	4	7	0	7	4	5	1	8	2	10	1.19386	0.00134664	991
petA	53	50	36	14	10	2	5	2	9	1	3	6	9	3	18	32	5	7	1	6	7	3	2	7	3	9	1.32056	0.00111808	993
petB	52	49	24	25	9	3	4	3	5	5	3	5	3	9	12	37	3	9	2	5	3	7	3	5	1	11	1.09541	0.00133723	689
petD	52	49	15	34	8	4	1	6	2	8	3	5	1	11	5	44	1	11	0	7	1	9	2	6	1	11	1.21522	0.000892882	584
petG	52	49	3	46	2	10	0	7	0	10	0	9	1	10	2	47	1	11	0	7	0	10	0	9	1	10	0.710287	0.000481662	114
petL	52	49	8	41	2	9	0	7	2	8	2	7	2	10	4	45	1	10	0	7	2	8	0	9	1	11	1.02442	0.000694958	108
petN	52	49	6	43	1	11	0	7	0	10	0	8	5	7	1	48	1	11	0	7	0	10	0	8	0	12	0.543435	0.000356191	99
psaA	53	50	29	21	7	5	5	2	8	2	3	6	6	6	21	29	6	6	3	4	7	3	2	7	3	9	0.901288	0.000567568	2253
psaB	53	50	36	14	9	3	5	2	10	0	7	2	5	7	19	31	6	6	2	5	6	4	3	6	2	10	0.930422	0.000584303	2205
psaC	53	50	12	38	4	8	0	7	5	5	2	7	1	11	7	43	2	10	0	7	3	7	2	7	0	12	1.08106	0.0010782	246
psaI	52	49	13	36	3	8	1	6	2	8	2	7	5	7	3	46	1	10	0	7	1	9	0	9	1	11	1.63324	0.00410376	114
psaJ	53	50	12	38	4	8	0	7	4	6	3	6	1	11	4	46	2	10	0	7	1	9	1	8	0	12	1.1152	0.00129108	135
psbA	53	50	28	22	6	6	4	3	6	4	5	4	7	5	9	41	2	10	0	7	3	7	3	6	1	11	0.809669	0.000301835	1062
psbB	52	49	26	23	6	6	3	4	9	0	5	4	3	9	19	30	5	7	1	6	8	1	3	6	2	10	1.16336	0.000701822	1527
psbC	53	50	31	19	7	5	4	3	9	1	7	2	4	8	23	27	5	7	3	4	6	4	5	4	4	8	0.919077	0.000498289	1423
psbD	53	50	22	28	5	7	3	4	8	2	3	6	3	9	9	41	2	10	0	7	3	7	3	6	1	11	0.72241	0.00018286	1080
psbE	52	49	15	34	5	7	2	5	6	4	1	7	1	11	4	45	2	10	0	7	2	8	0	8	0	12	0.671503	0.000346431	252
psbF	53	50	7	43	3	9	1	6	1	9	1	8	1	11	4	46	2	10	0	7	1	9	0	9	1	11	0.488534	0.000265871	120
psbH	53	50	17	33	2	10	2	5	7	3	3	6	3	9	6	44	1	11	0	7	4	6	0	9	1	11	1.40462	0.0025833	255
psbI	53	50	5	45	1	11	0	7	1	9	0	9	3	9	3	47	1	11	0	7	1	9	0	9	1	11	1.14272	0.00105793	168
psbJ	53	50	5	45	2	10	0	7	1	9	1	8	1	11	2	48	1	11	0	7	1	9	0	9	0	12	0.835821	0.00137024	123
psbK	53	50	8	42	1	11	0	7	3	7	1	8	3	9	3	47	1	11	0	7	0	10	1	8	1	11	1.18898	0.000725703	189
psbL	52	49	2	47	1	11	0	7	0	10	0	8	1	11	1	48	1	11	0	7	0	10	0	8	0	12	0.481058	0.000364675	120
psbM	52	49	4	45	2	9	0	7	1	9	1	8		12	2	47	1	10	0	7	1	9	0	9	0	12	0.94989	0.0012855	114
psbN	52	49	9	40	4	8	1	6	2	7	1	8	1	11	2	47	1	11	0	7	0	9	0	9	1	11	0.655384	0.000921069	132
psbT	53	50	9	41	3	9	1	6	0	10	4	5	1	11	1	49	1	11	0	7	0	10	0	9	0	12	1.12047	0.00243035	123
psbZ	45	43	8	35	1	10	1	5	3	3	1	7	2	10	1	42	0	11	0	6	1	5	0	8	0	12	0.514232	0.000188693	189
rbcL	53	50	28	22	5	7	5	2	8	2	5	4	5	7	18	32	4	8	1	6	6	4	4	5	3	9	1.39199	0.00129655	1482
rpl14	53	50	15	35	2	10	0	7	7	3	1	8	5	7	6	44	1	11	0	7	3	7	1	8	1	11	1.18846	0.00105768	378
rpl16	52	49	14	35	5	7	2	5	2	8	2	6	3	9	10	39	3	9	1	6	2	8	2	6	2	10	1.58407	0.00257254	450
rpl20	53	50	15	35	4	8	4	3	4	6	2	7	1	11	8	42	2	10	0	7	4	6	1	8	1	11	1.88177	0.00293666	461
rpl22	50	47	25	22	8	4	2	4	3	5	7	2	5	7	12	35	3	9	1	5	2	6	5	4	1	11	3.56925	0.0118579	749
rpl23	49	46	8	38	2	10	2	4	1	7	2	7	1	10	2	44	1	11	0	6	0	8	1	8	0	11	0.319797	0.00022572	303
rpl2	52	49	19	30	7	5	2	5	7	3	1	7	2	10	8	41	4	8	0	7	2	8	1	7	1	11	0.456695	0.000249029	975
rpl32	52	49	18	31	6	5	1	6	2	8	5	4	4	8	4	45	2	9	0	7	1	9	0	9	1	11	3.01651	0.0189374	274
rpl33	53	50	20	30	5	7	5	2	4	6	5	4	1	11	10	40	3	9	0	7	3	7	3	6	1	11	1.56225	0.00169206	216
rpl36	53	50	12	38	3	9	2	5	6	4	0	9	1	11	5	45	1	11	0	7	3	7	0	9	1	11	1.18777	0.00243718	117
rpoA	50	47	27	20	9	2	5	2	6	3	4	4	3	9	16	31	5	6	2	5	5	4	3	5	1	11	1.63088	0.00232877	1089
rpoB	52	49	32	17	10	2	4	3	8	2	5	3	5	7	27	22	8	4	3	4	8	2	5	3	3	9	1.2027	0.00169592	3340
rpoC1	51	48	28	20	8	4	3	4	10	0	4	3	3	9	20	28	6	6	3	4	6	4	2	5	3	9	1.2705	0.0023392	2189
rpoC2	52	49	46	3	12	0	6	1	9	1	7	1	12	0	40	9	10	2	6	1	9	1	7	1	8	4	1.6436	0.00216202	4538
rps11	53	50	22	28	5	7	3	4	6	4	4	5	4	8	9	41	1	11	0	7	3	7	2	7	3	9	1.888	0.00365062	486
rps12	50	47	8	39	2	10	0	6	2	7	4	4		12	5	42	1	11	0	6	2	7	2	6	0	12	0.525372	0.00225496	533
rps14	53	50	17	33	5	7	3	4	5	5	3	6	1	11	7	43	1	11	1	6	2	8	2	7	1	11	1.05623	0.000638928	303
rps15	52	49	18	31	1	11	3	4	5	5	5	3	4	8	7	42	1	11	0	7	3	7	2	6	1	11	2.16838	0.00131647	459
rps16	50	48	14	34	5	7	0	7	5	4	2	6	2	10	7	41	1	11	0	7	3	6	1	7	2	10	2.13233	0.00366034	339
rps18	53	50	14	36	3	9	0	7	4	6	4	5	3	9	7	43	2	10	0	7	1	9	3	6	1	11	1.46208	0.00365138	437
rps19	53	50	17	33	3	9	1	6	7	3	3	6	3	9	6	44	1	11	0	7	2	8	2	7	1	11	1.90144	0.00458706	348
rps2	53	50	20	30	7	5	4	3	5	5	2	7	2	10	16	34	5	7	4	3	3	7	2	7	2	10	1.29573	0.00165679	756
rps3	51	48	29	19	9	3	4	3	6	3	3	5	7	5	12	36	5	7	0	7	3	6	2	6	2	10	1.97697	0.00416519	843
rps4	53	50	30	20	9	3	4	3	7	3	7	2	3	9	20	30	6	6	3	4	6	4	3	6	2	10	1.31166	0.00161836	723
rps7	53	50	14	36	5	7	1	6	4	6	2	7	2	10	3	47	1	11	0	7	1	9	0	9	1	11	0.401757	0.000745331	486
rps8	53	50	23	27	5	7	4	3	9	1	2	7	3	9	11	39	3	9	0	7	4	6	2	7	2	10	1.79783	0.00310864	459
ycf1	49	47	32	15	4	8	5	2	9	1	5	1	9	3	25	22	1	11	5	2	8	2	3	3	8	4	4.66645	0.0199554	11274
ycf2	52	49	33	16	9	3	5	2	6	4	5	3	8	4	29	20	9	3	5	2	6	4	5	3	4	8	1.35992	0.00789776	11595
ycf3	51	48	21	27	7	5	0	7	3	6	4	4	7	5	9	39	3	9	0	7	2	7	2	6	2	10	1.00815	0.000678261	519
ycf4	51	48	23	25	7	5	4	3	5	4	3	5	4	8	12	36	2	10	3	4	2	7	3	5	2	10	1.18039	0.000857412	714
CC	53	50	45	5	12	0	7	0	9	1	6	3	11	1	43	7	12	0	7	0	9	1	6	3	9	3	1.84328	0.00276985	84945
