# Supplementary material for: Characterizing gene tree conflict in plastome-inferred phylogenies
Source: PeerJ. 2019 Sep 24;7:e7747. doi: 10.7717/peerj.7747 (PMC6764362; doi:10.7717/peerj.7747)
Supplement: Table S7 — Results of the analysis of MAFFT aligned amino acid data, including the taxon coverage, the total nodes that could be support, and the ones that could not as a result of taxon coverage. This is shown both with and without support and is presented for all the time slices analyzed. The different correlates, tree length, variance and alignment length are given in the final three columns. [file peerj-07-7747-s012.xlsx]

## Sheet: Mafft_Pep_Results
Table S7: Results of the analysis of MAFFT aligned amino acid data, including the taxon coverage, the total nodes that could be support, and the ones that could not as a result of taxon coverage. This is shown both with and without support and is presented for all the time slices analyzed. The different correlates, tree length, variance and alignment length are given in the final three columns.
GeneName	TotalTaxa	TotalSupportableNodes	TotalNodesSupported	TotalNotSupported	120-150S	120-150NS	90-120S	90-120NS	60-90S	60-90NS	30-60S	30-60NS	0-30S	0-30NS	TotalSupportedBs	TotalNoSupportBs	120-150Sbs	150-120NSbs	90-120Sbs	90-120NSbs	60-90Sbs	60-90NSbs	30-60Sbs	30-60NSbs	0-30Sbs	0-30NSbs	length	variance	Alignment Lengths
accD	48	45	18	27	2	9	6	1	5	2	3	6	2	9	10	35	1	10	1	6	3	4	3	6	2	9	3.11829	0.00455171	894
atpA	53	50	20	30	6	6	1	6	6	4	3	6	4	8	6	44	1	11	0	7	2	8	2	7	1	11	0.94845	0.00132322	514
atpB	53	50	13	37	1	11	0	7	6	4	4	5	2	10	8	42	1	11	0	7	2	8	4	5	1	11	0.813096	0.000655391	501
atpE	53	50	13	37	5	7	0	7	5	5	1	8	2	10	6	44	2	10	0	7	3	7	0	9	1	11	1.43596	0.00168054	140
atpF	52	49	18	31	4	8	0	7	6	4	5	3	3	9	10	39	3	9	0	7	4	6	2	6	1	11	2.02536	0.00470288	217
atpH	53	50	0	50	0	12	0	7	0	10	0	9		12	0	50	0	12	0	7	0	10	0	9	0	12	0.0248806	8.97363e-06	81
atpI	52	49	12	37	2	10	1	6	3	7	3	5	3	9	4	45	1	11	0	7	1	9	1	7	1	11	0.74499	0.000657703	249
ccsA	50	47	26	21	7	5	4	3	6	2	5	3	4	8	15	32	3	9	2	5	5	3	3	5	2	10	3.5232	0.0124551	357
cemA	53	50	20	30	8	4	1	6	6	4	3	6	2	10	8	42	4	8	0	7	2	8	1	8	1	11	2.85377	0.00592613	267
clpP	50	47	5	42	0	12	0	7	2	7	2	6	1	10	2	45	0	12	0	7	0	9	2	6	0	11	4.89596	0.0380599	287
infA	46	43	4	39	2	8	0	7	2	4	0	9		11	2	41	1	9	0	7	1	5	0	9	0	11	0.729573	0.0012595	91
matK	53	50	33	17	9	3	5	2	8	2	6	3	5	7	25	25	5	7	4	3	8	2	5	4	3	9	4.54927	0.0110168	589
ndhA	51	48	19	29	8	3	1	6	4	6	3	5	3	9	8	40	2	9	0	7	2	8	2	6	2	10	1.39982	0.000996396	382
ndhB	50	47	11	36	4	7	2	5	3	7	2	6		11	2	45	1	10	0	7	0	10	1	7	0	11	0.259851	0.000105527	543
ndhC	52	49	7	42	1	10	0	7	2	8	2	7	2	10	5	44	1	10	0	7	1	9	2	7	1	11	0.771268	0.000712525	135
ndhD	52	49	30	19	10	1	5	2	6	4	4	5	5	7	10	39	4	7	0	7	3	7	2	7	1	11	1.95427	0.00223892	542
ndhE	52	49	5	44	1	10	2	5	1	9	0	9	1	11	2	47	1	10	0	7	0	10	0	9	1	11	0.953484	0.00112604	101
ndhF	49	46	36	10	10	1	7	0	5	3	6	2	8	4	24	22	4	7	6	1	5	3	5	3	4	8	3.99252	0.010906	786
ndhG	52	49	22	27	8	3	1	6	5	5	4	5	4	8	6	43	1	10	0	7	1	9	2	7	2	10	1.76911	0.00282377	180
ndhH	50	47	16	31	4	7	0	7	5	3	2	7	5	7	5	42	1	10	0	7	2	6	1	8	1	11	0.857342	0.000201049	397
ndhI	51	48	8	40	1	10	2	5	3	7	1	7	1	11	3	45	1	10	0	7	1	9	0	8	1	11	1.47959	0.00107896	184
ndhJ	52	49	22	27	4	7	1	6	6	4	4	5	7	5	6	43	2	9	1	6	2	8	0	9	1	11	0.774725	0.00106525	173
ndhK	51	48	11	37	2	9	0	7	5	4	2	7	2	10	6	42	1	10	0	7	3	6	0	9	2	10	1.51541	0.00118442	331
petA	53	50	22	28	9	3	1	6	5	5	3	6	4	8	6	44	1	11	0	7	4	6	0	9	1	11	1.07206	0.000475647	338
petB	52	49	3	46	1	11	0	7	0	10	1	7	1	11	2	47	1	11	0	7	0	10	0	8	1	11	0.347735	0.000346131	229
petD	52	49	1	48	1	11	0	7	0	10	0	8		12	1	48	1	11	0	7	0	10	0	8	0	12	0.349873	0.000309763	193
petG	52	49	2	47	2	10	0	7	0	10	0	9		11	1	48	1	11	0	7	0	10	0	9	0	11	0.231661	0.000160878	37
petL	52	49	5	44	1	10	0	7	1	9	2	7	1	11	1	48	1	10	0	7	0	10	0	9	0	12	1.16385	0.00346429	35
petN	52	49	0	49	0	12	0	7	0	10	0	8		12	0	49	0	12	0	7	0	10	0	8	0	12	0.400351	0.000616591	32
psaA	53	50	11	39	5	7	0	7	4	6	1	8	1	11	7	43	3	9	0	7	3	7	0	9	1	11	0.2831	4.4961e-05	750
psaB	53	50	9	41	1	11	0	7	5	5	2	7	1	11	5	45	1	11	0	7	3	7	0	9	1	11	0.277344	6.2822e-05	734
psaC	53	50	6	44	2	10	0	7	3	7	1	8		12	2	48	1	11	0	7	1	9	0	9	0	12	0.179577	0.000169931	81
psaI	52	49	8	41	2	9	0	7	2	8	0	9	4	8	3	46	1	10	0	7	1	9	0	9	1	11	2.39076	0.0153193	38
psaJ	53	50	1	49	0	12	0	7	0	10	0	9	1	11	0	50	0	12	0	7	0	10	0	9	0	12	0.777698	0.00376804	44
psbA	53	50	6	44	1	11	0	7	5	5	0	9		12	1	49	1	11	0	7	0	10	0	9	0	12	0.161587	2.63679e-05	353
psbB	52	49	12	37	1	11	1	6	5	4	3	6	2	10	4	45	1	11	0	7	2	7	0	9	1	11	0.327924	0.000121425	508
psbC	53	50	7	43	1	11	1	6	3	7	1	8	1	11	5	45	1	11	0	7	3	7	0	9	1	11	0.202989	5.85804e-05	473
psbD	53	50	4	46	2	10	0	7	1	9	0	9	1	11	0	50	0	12	0	7	0	10	0	9	0	12	0.0989956	5.19069e-05	359
psbE	52	49	2	47	1	11	0	7	1	9	0	8		12	2	47	1	11	0	7	1	9	0	8	0	12	0.191551	0.000157426	83
psbF	53	50	0	50	0	12	0	7	0	10	0	9		12	0	50	0	12	0	7	0	10	0	9	0	12	0.130818	0.000129001	39
psbH	53	50	8	42	2	10	0	7	5	5	0	9	1	11	5	45	1	11	0	7	3	7	0	9	1	11	1.40875	0.00561053	84
psbI	53	50	2	48	1	11	0	7	0	10	0	9	1	11	1	49	1	11	0	7	0	10	0	9	0	12	0.6623	0.00200716	55
psbJ	53	50	3	47	1	11	1	6	0	10	1	8		12	0	50	0	12	0	7	0	10	0	9	0	12	0.84686	0.0035564	40
psbK	53	50	4	46	1	11	0	7	3	7	0	9		12	1	49	1	11	0	7	0	10	0	9	0	12	1.29921	0.000809969	64
psbL	52	49	0	49	0	12	0	7	0	10	0	8		12	0	49	0	12	0	7	0	10	0	8	0	12	0.0821163	6.89504e-05	38
psbM	52	49	2	47	1	10	0	7	1	9	0	9		12	2	47	1	10	0	7	1	9	0	9	0	12	0.287358	0.000374453	37
psbN	52	49	1	48	1	11	0	7	0	9	0	9		12	0	49	0	12	0	7	0	9	0	9	0	12	0.266569	0.000573018	43
psbT	53	50	4	46	3	9	0	7	0	10	1	8		12	0	50	0	12	0	7	0	10	0	9	0	12	0.990491	0.0077419	40
psbZ	45	43	2	41	1	10	1	5	0	6	0	8		12	0	43	0	11	0	6	0	6	0	8	0	12	0.42943	0.000720987	62
rbcL	53	50	15	35	3	9	0	7	6	4	3	6	3	9	8	42	3	9	0	7	2	8	1	8	2	10	1.39606	0.00146536	493
rpl14	53	50	9	41	1	11	1	6	5	5	1	8	1	11	2	48	1	11	0	7	1	9	0	9	0	12	0.828109	0.00100421	125
rpl16	52	49	9	40	2	10	1	6	3	7	1	7	2	10	3	46	2	10	0	7	0	10	0	8	1	11	1.68163	0.00721442	146
rpl20	53	50	12	38	3	9	2	5	3	7	2	7	2	10	7	43	1	11	1	6	3	7	1	8	1	11	3.0313	0.011095	151
rpl22	50	47	19	28	4	8	1	5	5	3	7	2	2	10	10	37	2	10	0	6	2	6	5	4	1	11	6.60179	0.0320647	263
rpl23	49	46	5	41	1	11	1	5	2	6	1	8		11	1	45	0	12	0	6	0	8	1	8	0	11	0.630596	0.00104673	100
rpl2	52	49	11	38	5	7	2	5	2	8	1	7	1	11	4	45	1	11	0	7	2	8	0	8	1	11	0.670878	0.000651508	324
rpl32	52	49	9	40	1	10	2	5	2	8	1	8	3	9	2	47	1	10	0	7	0	10	0	9	1	11	4.71367	0.0735615	97
rpl33	53	50	9	41	1	11	2	5	1	9	4	5	1	11	3	47	1	11	0	7	0	10	1	8	1	11	1.95995	0.00157042	71
rpl36	53	50	1	49	0	12	0	7	0	10	0	9	1	11	1	49	0	12	0	7	0	10	0	9	1	11	0.796073	0.00218562	38
rpoA	50	47	22	25	8	3	3	4	6	3	3	5	2	10	13	34	4	7	1	6	5	4	2	6	1	11	2.57206	0.00462396	363
rpoB	52	49	29	20	11	1	4	3	6	4	4	4	4	8	22	27	7	5	2	5	6	4	4	4	3	9	1.21555	0.00362521	1114
rpoC1	51	48	18	30	5	7	2	5	5	5	3	4	3	9	9	39	2	10	0	7	4	6	2	5	1	11	1.46649	0.00500962	732
rpoC2	52	49	44	5	11	1	5	2	10	0	7	1	11	1	32	17	8	4	4	3	9	1	5	3	6	6	2.31223	0.00517213	1516
rps11	53	50	12	38	2	10	2	5	3	7	2	7	3	9	5	45	1	11	0	7	2	8	1	8	1	11	1.98341	0.0107584	158
rps12	50	47	2	45	1	11	0	6	1	8	0	8		12	2	45	1	11	0	6	1	8	0	8	0	12	0.541229	0.00382391	155
rps14	53	50	5	45	1	11	0	7	2	8	1	8	1	11	2	48	1	11	0	7	0	10	0	9	1	11	1.30083	0.00162984	100
rps15	52	49	10	39	1	11	2	5	5	5	1	7	1	11	4	45	1	11	0	7	2	8	0	8	1	11	3.07031	0.00484074	139
rps16	50	48	6	42	1	11	1	6	3	6	0	8	1	11	2	46	0	12	0	7	1	8	0	8	1	11	3.35778	0.023186	113
rps18	53	50	9	41	1	11	0	7	4	6	2	7	2	10	3	47	1	11	0	7	1	9	0	9	1	11	2.91639	0.0372111	154
rps19	53	50	9	41	2	10	0	7	4	6	2	7	1	11	2	48	0	12	0	7	1	9	0	9	1	11	1.85422	0.00888134	114
rps2	53	50	14	36	3	9	1	6	4	6	3	6	3	9	8	42	2	10	0	7	3	7	1	8	2	10	1.52789	0.00398703	249
rps3	51	48	21	27	5	7	3	4	6	3	3	5	4	8	6	42	2	10	0	7	2	7	1	7	1	11	3.27393	0.0210246	300
rps4	53	50	14	36	7	5	0	7	4	6	1	8	2	10	4	46	1	11	0	7	2	8	0	9	1	11	1.74013	0.00475734	244
rps7	53	50	6	44	1	11	0	7	1	9	3	6	1	11	4	46	1	11	0	7	1	9	1	8	1	11	0.715218	0.00311342	161
rps8	53	50	15	35	2	10	2	5	7	3	2	7	2	10	5	45	1	11	0	7	2	8	1	8	1	11	2.3754	0.00265403	150
ycf1	49	47	26	21	3	9	5	2	5	5	4	2	9	3	15	32	1	11	0	7	5	5	3	3	6	6	12.0641	0.182788	3967
ycf2	52	49	36	13	10	2	6	1	7	3	5	3	8	4	22	27	6	6	3	4	5	5	4	4	4	8	3.30911	0.0528567	3902
ycf3	51	48	7	41	1	11	0	7	2	7	0	8	4	8	2	46	1	11	0	7	0	9	0	8	1	11	0.595609	0.000486842	172
ycf4	51	48	14	34	5	7	3	4	3	6	2	6	1	11	7	41	1	11	1	6	2	7	2	6	1	11	1.22962	0.00138407	237
CC	53	50	44	6	12	0	7	0	9	1	6	3	10	2	44	6	12	0	7	0	9	1	6	3	10	2	3.6871	0.0146198	28558
