# Supplementary material for: Characterizing gene tree conflict in plastome-inferred phylogenies
Source: PeerJ. 2019 Sep 24;7:e7747. doi: 10.7717/peerj.7747 (PMC6764362; doi:10.7717/peerj.7747)
Supplement: Table S8 — Results of the analysis of FSA aligned nucleotide data cleaned for a minimum of 30% column occupancy, including the taxon coverage, the total nodes that could be support, and the ones that could not as a result of taxon coverage. This is shown both with and without support and is presented for all the time slices analyzed. The different correlates, tree length, variance and alignment length are given in the final three columns. [file peerj-07-7747-s013.xlsx]

## Sheet: Cleaned_Nuc_Results
Table S8: Results of the analysis of FSA aligned nucleotide data cleaned for a minimum of 30% column occupancy, including the taxon coverage, the total nodes that could be support, and the ones that could not as a result of taxon coverage. This is shown both with and without support and is presented for all the time slices analyzed. The different correlates, tree length, variance and alignment le…
GeneName	TotalTaxa	TotalSupportableNodes	TotalNodesSupported	TotalNotSupported	120-150S	120-150NS	90-120S	90-120NS	60-90S	60-90NS	30-60S	30-60NS	0-30S	0-30NS	TotalSupportedBs	TotalNoSupportBs	120-150Sbs	150-120NSbs	90-120Sbs	90-120NSbs	60-90Sbs	60-90NSbs	30-60Sbs	30-60NSbs	0-30Sbs	0-30NSbs	length	variance	Alignment Length
accD	48	45	25	20	8	3	6	1	4	3	4	5	3	8	17	28	5	6	3	4	4	3	3	6	2	9	1.54239	0.00172146	1550
atpA	53	50	27	23	8	4	3	4	7	3	4	5	5	7	21	29	6	6	2	5	6	4	4	5	3	9	1.31458	0.00140151	1527
atpB	53	50	31	19	8	4	5	2	7	3	6	3	5	7	22	28	7	5	3	4	5	5	4	5	3	9	1.12905	0.00105791	1497
atpE	53	50	29	21	9	3	3	4	8	2	6	3	3	9	12	38	5	7	0	7	3	7	1	8	3	9	1.47564	0.00136914	402
atpF	52	49	25	24	6	6	2	5	8	2	5	3	4	8	17	32	4	8	0	7	8	2	4	4	1	11	1.45213	0.00154253	555
atpH	53	50	23	27	8	4	1	6	6	4	5	4	3	9	4	46	1	11	0	7	2	8	0	9	1	11	0.76783	0.000847477	246
atpI	52	49	26	23	5	7	5	2	8	2	4	4	4	8	12	37	3	9	2	5	4	6	2	6	1	11	1.03291	0.000679667	744
ccsA	50	47	34	13	9	3	4	3	7	1	8	0	6	6	20	27	5	7	4	3	6	2	3	5	2	10	2.28504	0.00405731	982
cemA	53	50	28	22	8	4	3	4	8	2	5	4	4	8	18	32	7	5	2	5	4	6	2	7	3	9	1.57655	0.00175559	690
clpP	50	47	14	33	4	8	0	7	2	7	5	3	3	8	5	42	1	11	0	7	1	8	2	6	1	10	2.17711	0.010708	591
infA	46	43	10	33	2	8	2	5	2	4	2	7	2	9	2	41	1	9	0	7	1	5	0	9	0	11	1.16915	0.00148999	234
matK	53	50	38	12	11	1	5	2	8	2	7	2	7	5	30	20	7	5	5	2	8	2	5	4	5	7	2.43046	0.00324235	1523
ndhA	51	48	30	18	7	4	5	2	9	1	5	3	4	8	23	25	5	6	3	4	7	3	4	4	4	8	1.43967	0.00125346	1092
ndhB	50	47	16	31	7	4	1	6	3	7	3	5	2	9	12	35	6	5	1	6	1	9	3	5	1	10	0.220491	8.04914e-05	1533
ndhC	52	49	19	30	4	7	1	6	5	5	7	2	2	10	10	39	1	10	1	6	3	7	4	5	1	11	0.891526	0.00105952	363
ndhD	52	49	34	15	10	1	4	3	8	2	7	2	5	7	26	23	10	1	3	4	6	4	3	6	4	8	1.72649	0.00219465	1503
ndhE	52	49	20	29	4	7	5	2	5	5	5	4	1	11	9	40	2	9	0	7	3	7	3	6	1	11	1.25121	0.00300493	306
ndhF	49	46	41	5	9	2	7	0	7	1	7	1	11	1	31	15	6	5	6	1	6	2	7	1	6	6	2.50376	0.0038928	2235
ndhG	52	49	24	25	5	6	2	5	7	3	4	5	6	6	16	33	4	7	1	6	5	5	3	6	3	9	1.37415	0.00180532	531
ndhH	50	47	27	20	8	3	4	3	5	3	4	5	6	6	19	28	8	3	2	5	4	4	2	7	3	9	1.23622	0.00126829	1182
ndhI	51	48	18	30	5	6	3	4	6	4	3	5	1	11	10	38	1	10	1	6	4	6	3	5	1	11	1.1172	0.000830908	501
ndhJ	52	49	26	23	6	5	3	4	7	3	4	5	6	6	16	33	4	7	2	5	4	6	2	7	4	8	0.955646	0.000788248	477
ndhK	51	48	15	33	5	6	0	7	5	4	1	8	4	8	11	37	4	7	0	7	4	5	1	8	2	10	1.12299	0.00114807	678
petA	53	50	36	14	11	1	5	2	9	1	3	6	8	4	18	32	5	7	1	6	7	3	2	7	3	9	1.31369	0.00115413	963
petB	52	49	24	25	8	4	4	3	6	4	3	5	3	9	12	37	2	10	3	4	3	7	3	5	1	11	1.03933	0.00118667	648
petD	52	49	18	31	8	4	1	6	6	4	2	6	1	11	7	42	1	11	0	7	3	7	2	6	1	11	1.1418	0.000792664	483
petG	52	49	3	46	2	10	0	7	0	10	0	9	1	10	2	47	1	11	0	7	0	10	0	9	1	10	0.692597	0.00052529	114
petL	52	49	9	40	2	9	0	7	2	8	2	7	3	9	4	45	1	10	0	7	2	8	0	9	1	11	1.00682	0.0006506	96
petN	52	49	5	44	1	11	0	7	1	9	0	8	3	9	1	48	1	11	0	7	0	10	0	8	0	12	0.564349	0.000328163	90
psaA	53	50	31	19	7	5	5	2	8	2	3	6	8	4	22	28	6	6	3	4	7	3	2	7	4	8	0.901359	0.000567625	2253
psaB	53	50	37	13	9	3	5	2	10	0	7	2	6	6	19	31	6	6	2	5	6	4	3	6	2	10	0.930612	0.000584444	2205
psaC	53	50	12	38	4	8	0	7	5	5	2	7	1	11	6	44	2	10	0	7	3	7	1	8	0	12	1.07395	0.00107626	246
psaI	52	49	14	35	3	8	1	6	3	7	3	6	4	8	3	46	1	10	0	7	1	9	0	9	1	11	1.58209	0.00382747	111
psaJ	53	50	11	39	4	8	0	7	4	6	2	7	1	11	4	46	2	10	0	7	1	9	1	8	0	12	1.09092	0.00109403	135
psbA	53	50	30	20	6	6	4	3	7	3	5	4	8	4	7	43	2	10	0	7	3	7	1	8	1	11	0.8073	0.000302025	1062
psbB	52	49	26	23	6	6	3	4	9	0	5	4	3	9	18	31	3	9	1	6	8	1	4	5	2	10	1.16341	0.000701858	1527
psbC	53	50	33	17	7	5	4	3	9	1	7	2	6	6	23	27	5	7	3	4	6	4	5	4	4	8	0.919078	0.000498282	1422
psbD	53	50	23	27	5	7	3	4	8	2	3	6	4	8	10	40	2	10	1	6	3	7	3	6	1	11	0.722461	0.000182878	1062
psbE	52	49	14	35	5	7	2	5	6	4	1	7		12	5	44	2	10	0	7	3	7	0	8	0	12	0.671209	0.000338421	252
psbF	53	50	10	40	4	8	1	6	3	7	1	8	1	11	4	46	2	10	0	7	1	9	0	9	1	11	0.490884	0.000269669	120
psbH	53	50	18	32	2	10	2	5	7	3	4	5	3	9	6	44	1	11	0	7	4	6	0	9	1	11	1.39399	0.00261529	222
psbI	53	50	7	43	1	11	0	7	3	7	0	9	3	9	3	47	1	11	0	7	1	9	0	9	1	11	0.902831	0.000535859	111
psbJ	53	50	7	43	2	10	0	7	2	8	1	8	2	10	2	48	1	11	0	7	1	9	0	9	0	12	0.873745	0.00151482	123
psbK	53	50	8	42	1	11	0	7	3	7	1	8	3	9	3	47	1	11	0	7	0	10	1	8	1	11	1.1618	0.000622631	186
psbL	52	49	4	45	2	10	0	7	1	9	0	8	1	11	1	48	1	11	0	7	0	10	0	8	0	12	0.460582	0.000338265	117
psbM	52	49	5	44	2	9	0	7	2	8	1	8		12	2	47	1	10	0	7	1	9	0	9	0	12	0.876633	0.00408737	105
psbN	52	49	9	40	4	8	1	6	2	7	1	8	1	11	3	46	2	10	0	7	0	9	0	9	1	11	0.655427	0.000921211	132
psbT	53	50	8	42	4	8	0	7	2	8	1	8	1	11	1	49	1	11	0	7	0	10	0	9	0	12	1.06335	0.00157492	108
psbZ	45	43	7	36	1	10	1	5	4	2	0	8	1	11	1	42	0	11	0	6	1	5	0	8	0	12	0.51422	0.000188696	189
rbcL	53	50	27	23	5	7	5	2	8	2	4	5	5	7	19	31	4	8	1	6	7	3	4	5	3	9	1.34968	0.00115304	1459
rpl14	53	50	12	38	2	10	0	7	7	3	1	8	2	10	8	42	1	11	0	7	4	6	1	8	2	10	1.18908	0.00105902	369
rpl16	52	49	16	33	5	7	2	5	3	7	3	5	3	9	11	38	3	9	1	6	2	8	3	5	2	10	1.551	0.00220401	414
rpl20	53	50	15	35	4	8	3	4	4	6	2	7	2	10	7	43	1	11	0	7	4	6	1	8	1	11	1.78198	0.00263238	381
rpl22	50	47	24	23	6	6	4	2	5	3	7	2	2	10	11	36	3	9	0	6	2	6	5	4	1	11	2.52514	0.00444859	475
rpl23	49	46	10	36	3	9	2	4	2	6	2	7	1	10	3	43	1	11	1	5	0	8	1	8	0	11	0.307305	0.000210648	282
rpl2	52	49	18	31	6	6	2	5	7	3	1	7	2	10	8	41	4	8	0	7	2	8	1	7	1	11	0.435714	0.000215047	825
rpl32	52	49	21	28	7	4	2	5	2	8	5	4	5	7	4	45	2	9	0	7	1	9	0	9	1	11	2.00428	0.00297209	165
rpl33	53	50	22	28	5	7	4	3	4	6	7	2	2	10	11	39	3	9	1	6	3	7	3	6	1	11	1.56203	0.00158047	201
rpl36	53	50	13	37	3	9	3	4	6	4	0	9	1	11	4	46	1	11	0	7	2	8	0	9	1	11	1.17485	0.00239064	114
rpoA	50	47	29	18	9	2	5	2	7	2	4	4	4	8	14	33	5	6	2	5	4	5	2	6	1	11	1.57573	0.00226298	1014
rpoB	52	49	31	18	10	2	4	3	8	2	5	3	4	8	27	22	8	4	3	4	8	2	5	3	3	9	1.18945	0.00146565	3240
rpoC1	51	48	25	23	7	5	3	4	8	2	4	3	3	9	20	28	6	6	3	4	6	4	2	5	3	9	1.23836	0.00183562	2111
rpoC2	52	49	46	3	12	0	6	1	9	1	7	1	12	0	38	11	10	2	5	2	9	1	7	1	7	5	1.62528	0.00210747	4199
rps11	53	50	21	29	4	8	3	4	6	4	4	5	4	8	9	41	1	11	1	6	3	7	2	7	2	10	1.88145	0.00357863	419
rps12	50	47	14	33	6	6	1	5	3	6	4	4		12	7	40	1	11	1	5	3	6	2	6	0	12	0.419478	0.000533755	384
rps14	53	50	17	33	5	7	3	4	5	5	3	6	1	11	6	44	1	11	0	7	2	8	2	7	1	11	1.05623	0.000638927	303
rps15	52	49	16	33	1	11	2	5	5	5	5	3	3	9	7	42	1	11	0	7	3	7	2	6	1	11	2.09045	0.000937682	279
rps16	50	48	19	29	5	7	5	2	5	4	2	6	2	10	4	44	0	12	0	7	2	7	1	7	1	11	1.73107	0.00189409	267
rps18	53	50	14	36	3	9	0	7	4	6	4	5	3	9	7	43	2	10	0	7	1	9	3	6	1	11	1.20211	0.00151299	306
rps19	53	50	17	33	3	9	1	6	7	3	3	6	3	9	7	43	2	10	0	7	2	8	2	7	1	11	1.89677	0.00448198	279
rps2	53	50	19	31	7	5	4	3	4	6	2	7	2	10	15	35	4	8	4	3	3	7	2	7	2	10	1.28526	0.00161778	711
rps3	51	48	29	19	9	3	4	3	7	2	3	5	6	6	14	34	6	6	0	7	3	6	3	5	2	10	1.88312	0.00386935	657
rps4	53	50	32	18	11	1	4	3	7	3	7	2	3	9	19	31	6	6	3	4	5	5	3	6	2	10	1.26069	0.00166339	606
rps7	53	50	13	37	6	6	1	6	4	6	1	8	1	11	3	47	1	11	0	7	1	9	0	9	1	11	0.401747	0.000745276	468
rps8	53	50	22	28	5	7	4	3	8	2	2	7	3	9	11	39	3	9	0	7	4	6	2	7	2	10	1.79208	0.00310192	405
ycf1	49	47	36	11	9	3	5	2	8	2	5	1	9	3	25	22	2	10	5	2	7	3	3	3	8	4	3.71421	0.0142303	6066
ycf2	52	49	35	14	9	3	5	2	8	2	5	3	8	4	28	21	9	3	5	2	5	5	5	3	4	8	1.00022	0.00284008	6957
ycf3	51	48	21	27	7	5	1	6	3	6	4	4	6	6	9	39	3	9	0	7	2	7	2	6	2	10	0.93524	0.000611296	507
ycf4	51	48	23	25	7	5	5	2	5	4	3	5	3	9	11	37	2	10	2	5	2	7	3	5	2	10	1.17987	0.000856666	555
CC	53	50	45	5	12	0	7	0	9	1	6	3	11	1	42	8	12	0	6	1	9	1	6	3	9	3	1.57952	0.00175125	69442
