# Supplementary material for: Characterizing gene tree conflict in plastome-inferred phylogenies
Source: PeerJ. 2019 Sep 24;7:e7747. doi: 10.7717/peerj.7747 (PMC6764362; doi:10.7717/peerj.7747)
Supplement: Table S9 — Results of the analysis of amino acid aligned data cleaned for a minimum of 30% column occupancy, including the taxon coverage, the total nodes that could be support, and the ones that could not as a result of taxon coverage. This is shown both with and without support and is presented for all the time slices analyzed. The different correlates, tree length, variance and alignment length are given in the final three columns. [file peerj-07-7747-s014.xlsx]

## Sheet: Cleaned_AA_Results
Table S10: Results of the analysis of amino acid aligned data cleaned for a minimum of 30% column occupancy, including the taxon coverage, the total nodes that could be support, and the ones that could not as a result of taxon coverage. This is shown both with and without support and is presented for all the time slices analyzed. The different correlates, tree length, variance and alignment lengt…
GeneName	TotalTaxa	TotalSupportableNodes	TotalNodesSupported	TotalNotSupported	120-150S	120-150NS	90-120S	90-120NS	60-90S	60-90NS	30-60S	30-60NS	0-30S	0-30NS	TotalSupportedBs	TotalNoSupportBs	120-150Sbs	150-120NSbs	90-120Sbs	90-120NSbs	60-90Sbs	60-90NSbs	30-60Sbs	30-60NSbs	0-30Sbs	0-30NSbs	length	variance	Alignment Length
accD	48	45	16	29	1	10	5	2	5	2	3	6	2	9	13	32	1	10	3	4	4	3	3	6	2	9	2.95738	0.00382507	514
atpA	53	50	19	31	6	6	1	6	6	4	3	6	3	9	9	41	3	9	0	7	3	7	2	7	1	11	0.928142	0.00128038	508
atpB	53	50	12	38	1	11	0	7	6	4	4	5	1	11	8	42	1	11	0	7	2	8	4	5	1	11	0.796844	0.000605702	498
atpE	53	50	13	37	5	7	1	6	4	6	1	8	2	10	6	44	2	10	0	7	3	7	0	9	1	11	1.34807	0.00137834	133
atpF	52	49	19	30	4	8	0	7	6	4	5	3	4	8	9	40	2	10	0	7	4	6	2	6	1	11	1.97018	0.00461929	184
atpH	53	50	0	50	0	12	0	7	0	10	0	9		12	0	50	0	12	0	7	0	10	0	9	0	12	0.0248806	8.97192e-06	81
atpI	52	49	12	37	2	10	1	6	4	6	3	5	2	10	5	44	1	11	1	6	1	9	1	7	1	11	0.738883	0.000659366	247
ccsA	50	47	28	19	8	4	4	3	6	2	5	3	5	7	14	33	3	9	2	5	4	4	3	5	2	10	3.52646	0.0110883	325
cemA	53	50	18	32	7	5	1	6	6	4	2	7	2	10	10	40	4	8	1	6	2	8	1	8	2	10	2.76702	0.00562671	229
clpP	50	47	7	40	0	12	0	7	2	7	3	5	2	9	2	45	0	12	0	7	0	9	2	6	0	11	3.42263	0.0123673	196
infA	46	43	4	39	2	8	1	6	1	5	0	9		11	2	41	1	9	0	7	1	5	0	9	0	11	0.706058	0.00118885	77
matK	53	50	31	19	8	4	5	2	8	2	6	3	4	8	25	25	5	7	4	3	8	2	5	4	3	9	4.50761	0.010238	506
ndhA	51	48	21	27	8	3	1	6	6	4	3	5	3	9	10	38	2	9	0	7	3	7	2	6	3	9	1.41487	0.000868399	363
ndhB	50	47	13	34	4	7	2	5	4	6	3	5		11	2	45	1	10	0	7	0	10	1	7	0	11	0.259296	0.000105065	510
ndhC	52	49	8	41	1	10	0	7	3	7	2	7	2	10	5	44	1	10	0	7	1	9	2	7	1	11	0.771269	0.00071252	120
ndhD	52	49	30	19	10	1	5	2	6	4	4	5	5	7	10	39	4	7	0	7	3	7	2	7	1	11	1.84612	0.00198633	500
ndhE	52	49	6	43	1	10	2	5	2	8	0	9	1	11	2	47	1	10	0	7	0	10	0	9	1	11	0.945248	0.00114921	101
ndhF	49	46	33	13	8	3	6	1	5	3	6	2	8	4	25	21	4	7	6	1	5	3	5	3	5	7	3.78577	0.00746536	746
ndhG	52	49	20	29	5	6	1	6	5	5	4	5	5	7	6	43	1	10	0	7	1	9	2	7	2	10	1.74904	0.00325578	176
ndhH	50	47	16	31	5	6	0	7	4	4	3	6	4	8	5	42	1	10	0	7	2	6	1	8	1	11	0.839253	0.000193597	393
ndhI	51	48	10	38	1	10	3	4	4	6	1	7	1	11	3	45	1	10	0	7	1	9	0	8	1	11	1.2612	0.00074988	167
ndhJ	52	49	23	26	4	7	2	5	5	5	4	5	8	4	7	42	2	9	1	6	2	8	1	8	1	11	0.771674	0.00107635	158
ndhK	51	48	12	36	2	9	0	7	7	2	1	8	2	10	5	43	1	10	0	7	2	7	0	9	2	10	1.23989	0.000661112	225
petA	53	50	24	26	9	3	1	6	6	4	3	6	5	7	7	43	1	11	0	7	3	7	1	8	2	10	1.08482	0.000499558	320
petB	52	49	3	46	1	11	0	7	0	10	1	7	1	11	2	47	1	11	0	7	0	10	0	8	1	11	0.166372	0.00014772	215
petD	52	49	3	46	2	10	0	7	0	10	0	8	1	11	1	48	1	11	0	7	0	10	0	8	0	12	0.221598	8.74042e-05	160
petG	52	49	2	47	2	10	0	7	0	10	0	9		11	1	48	1	11	0	7	0	10	0	9	0	11	0.231661	0.000160961	37
petL	52	49	7	42	1	10	0	7	1	9	2	7	3	9	1	48	1	10	0	7	0	10	0	9	0	12	1.12378	0.00292021	31
petN	52	49	0	49	0	12	0	7	0	10	0	8		12	0	49	0	12	0	7	0	10	0	8	0	12	0.363541	0.000456998	29
psaA	53	50	11	39	5	7	0	7	4	6	1	8	1	11	6	44	2	10	0	7	3	7	0	9	1	11	0.283156	4.37021e-05	750
psaB	53	50	9	41	1	11	0	7	4	6	3	6	1	11	5	45	1	11	0	7	3	7	0	9	1	11	0.28025	6.57361e-05	734
psaC	53	50	5	45	1	11	0	7	2	8	1	8	1	11	2	48	1	11	0	7	1	9	0	9	0	12	0.179577	0.000169943	81
psaI	52	49	7	42	2	9	0	7	3	7	0	9	2	10	3	46	1	10	0	7	1	9	0	9	1	11	2.04628	0.0140021	36
psaJ	53	50	0	50	0	12	0	7	0	10	0	9		12	0	50	0	12	0	7	0	10	0	9	0	12	0.7777	0.00376822	44
psbA	53	50	5	45	1	11	0	7	4	6	0	9		12	1	49	1	11	0	7	0	10	0	9	0	12	0.155882	2.49687e-05	353
psbB	52	49	15	34	4	8	1	6	5	4	3	6	2	10	5	44	1	11	0	7	3	6	0	9	1	11	0.326402	8.71279e-05	508
psbC	53	50	6	44	1	11	0	7	4	6	0	9	1	11	4	46	1	11	0	7	2	8	0	9	1	11	0.210312	3.39261e-05	473
psbD	53	50	3	47	1	11	0	7	2	8	0	9		12	0	50	0	12	0	7	0	10	0	9	0	12	0.0933928	5.139e-05	353
psbE	52	49	2	47	1	11	0	7	1	9	0	8		12	2	47	1	11	0	7	1	9	0	8	0	12	0.191555	0.000157439	83
psbF	53	50	0	50	0	12	0	7	0	10	0	9		12	0	50	0	12	0	7	0	10	0	9	0	12	0.130818	0.000129009	39
psbH	53	50	8	42	2	10	0	7	4	6	0	9	2	10	5	45	1	11	0	7	3	7	0	9	1	11	1.42235	0.00468543	73
psbI	53	50	2	48	1	11	0	7	0	10	0	9	1	11	1	49	1	11	0	7	0	10	0	9	0	12	0.237329	0.000330458	36
psbJ	53	50	3	47	1	11	0	7	0	10	1	8	1	11	0	50	0	12	0	7	0	10	0	9	0	12	0.808919	0.0027532	40
psbK	53	50	4	46	1	11	0	7	2	8	0	9	1	11	1	49	1	11	0	7	0	10	0	9	0	12	1.38072	0.00121264	61
psbL	52	49	0	49	0	12	0	7	0	10	0	8		12	0	49	0	12	0	7	0	10	0	8	0	12	0.0806004	6.94656e-05	38
psbM	52	49	2	47	1	10	0	7	1	9	0	9		12	2	47	1	10	0	7	1	9	0	9	0	12	0.258599	0.000307956	34
psbN	52	49	1	48	1	11	0	7	0	9	0	9		12	0	49	0	12	0	7	0	9	0	9	0	12	0.267209	0.000573508	43
psbT	53	50	3	47	3	9	0	7	0	10	0	9		12	0	50	0	12	0	7	0	10	0	9	0	12	0.603817	0.00352103	35
psbZ	45	43	3	40	1	10	1	5	1	5	0	8		12	0	43	0	11	0	6	0	6	0	8	0	12	0.429428	0.000720953	62
rbcL	53	50	14	36	3	9	0	7	5	5	3	6	3	9	9	41	3	9	0	7	3	7	1	8	2	10	1.47044	0.00338113	485
rpl14	53	50	7	43	1	11	0	7	5	5	0	9	1	11	3	47	1	11	0	7	1	9	0	9	1	11	0.828044	0.00100402	122
rpl16	52	49	10	39	3	9	1	6	3	7	1	7	2	10	4	45	2	10	0	7	1	9	0	8	1	11	1.66032	0.00792395	136
rpl20	53	50	10	40	3	9	2	5	3	7	1	8	1	11	6	44	1	11	1	6	3	7	0	9	1	11	2.81661	0.00998354	126
rpl22	50	47	22	25	5	7	1	5	7	1	7	2	2	10	8	39	2	10	0	6	1	7	4	5	1	11	5.49767	0.038844	158
rpl23	49	46	6	40	2	10	1	5	2	6	1	8		11	1	45	0	12	0	6	0	8	1	8	0	11	0.636076	0.000888185	93
rpl2	52	49	9	40	3	9	2	5	2	8	1	7	1	11	6	43	2	10	0	7	2	8	1	7	1	11	0.622894	0.000621472	274
rpl32	52	49	7	42	1	10	1	6	2	8	1	8	2	10	2	47	1	10	0	7	0	10	0	9	1	11	5.0736	0.113526	54
rpl33	53	50	9	41	1	11	2	5	2	8	3	6	1	11	3	47	1	11	0	7	0	10	1	8	1	11	1.95773	0.00155901	66
rpl36	53	50	1	49	0	12	0	7	0	10	0	9	1	11	1	49	0	12	0	7	0	10	0	9	1	11	0.778536	0.00221121	37
rpoA	50	47	24	23	8	3	3	4	6	3	3	5	4	8	12	35	4	7	0	7	5	4	2	6	1	11	2.5678	0.0044472	337
rpoB	52	49	29	20	11	1	4	3	6	4	4	4	4	8	23	26	8	4	2	5	6	4	4	4	3	9	1.2006	0.0030298	1077
rpoC1	51	48	19	29	5	7	2	5	5	5	3	4	4	8	9	39	2	10	0	7	3	7	2	5	2	10	1.42321	0.00447855	699
rpoC2	52	49	45	4	11	1	6	1	10	0	7	1	11	1	31	18	7	5	4	3	9	1	5	3	6	6	2.30075	0.00472053	1399
rps11	53	50	12	38	2	10	2	5	3	7	2	7	3	9	5	45	1	11	0	7	2	8	1	8	1	11	1.98129	0.0110181	138
rps12	50	47	3	44	2	10	0	6	1	8	0	8		12	2	45	1	11	0	6	1	8	0	8	0	12	0.419351	0.00275011	123
rps14	53	50	5	45	1	11	0	7	2	8	1	8	1	11	2	48	1	11	0	7	0	10	0	9	1	11	1.30083	0.00162985	100
rps15	52	49	8	41	1	11	0	7	5	5	0	8	2	10	4	45	1	11	0	7	2	8	0	8	1	11	2.82554	0.00955685	92
rps16	50	48	6	42	1	11	1	6	3	6	0	8	1	11	3	45	0	12	0	7	2	7	0	8	1	11	2.33265	0.00581603	88
rps18	53	50	6	44	1	11	0	7	1	9	2	7	2	10	3	47	1	11	0	7	1	9	0	9	1	11	2.55836	0.0211881	101
rps19	53	50	9	41	2	10	0	7	4	6	2	7	1	11	4	46	1	11	0	7	2	8	0	9	1	11	1.81684	0.00767353	92
rps2	53	50	14	36	3	9	1	6	4	6	4	5	2	10	8	42	2	10	0	7	3	7	1	8	2	10	1.47622	0.00357816	236
rps3	51	48	20	28	5	7	3	4	7	2	1	7	4	8	6	42	2	10	0	7	2	7	1	7	1	11	2.7012	0.0123805	218
rps4	53	50	13	37	6	6	0	7	4	6	1	8	2	10	4	46	1	11	0	7	2	8	0	9	1	11	1.67889	0.00380656	201
rps7	53	50	6	44	1	11	0	7	1	9	3	6	1	11	4	46	1	11	0	7	1	9	1	8	1	11	0.71512	0.00311263	155
rps8	53	50	16	34	2	10	2	5	7	3	3	6	2	10	5	45	1	11	0	7	2	8	1	8	1	11	2.38071	0.00275386	134
ycf1	49	47	27	20	3	9	5	2	6	4	4	2	9	3	17	30	1	11	0	7	6	4	4	2	6	6	8.41693	0.0496161	2006
ycf2	52	49	35	14	10	2	5	2	6	4	5	3	9	3	21	28	5	7	3	4	5	5	4	4	4	8	2.16608	0.0134625	2318
ycf3	51	48	7	41	1	11	0	7	2	7	0	8	4	8	2	46	1	11	0	7	0	9	0	8	1	11	0.647898	0.000745125	168
ycf4	51	48	15	33	5	7	3	4	4	5	2	6	1	11	6	42	1	11	1	6	1	8	2	6	1	11	1.22897	0.00138266	184
CC	53	50	42	8	10	2	7	0	10	0	6	3	9	3	37	13	9	3	6	1	8	2	6	3	8	4	2.87747	0.00776692	13692
