# Supplementary material for: Characterizing gene tree conflict in plastome-inferred phylogenies
Source: PeerJ. 2019 Sep 24;7:e7747. doi: 10.7717/peerj.7747 (PMC6764362; doi:10.7717/peerj.7747)
Supplement: Table S13 — Results of the analysis of different sections of the plastome including the concordance at different times scales with (S) and without support (NS), along with tree length and root to tip variance. [file peerj-07-7747-s018.xlsx]

## Sheet: Stats.txt
Table S13: Results of the analysis of different sections of the plastome including the concordance at different times scales with (S) and without support (NS), along with tree length and root to tip variance.
Section	0-30NS	30-60NS	60-90NS	90-120NS	120-150NS	Total NS	0-30S	30-60S	60-90S	90-120S	120-150S	Total	Length	Variance
IR	8	4	8	5	9	34	4	4	7	4	8	27	0.977109	0.00275528
LSC	9	6	9	7	12	43	9	6	9	6	12	42	1.81971	0.00235818
SSC	10	8	9	7	9	43	7	8	9	7	9	40	2.04828	0.00227348
