# Supplementary material for: Characterizing gene tree conflict in plastome-inferred phylogenies
Source: PeerJ journal article supplement (doi:10.7717/peerj.7747), 2019-09-24
Supplement: TableS2_fullmod_fulldat.pdf [file TableS2_fullmod_fulldat.pdf]

**Table S2:** Binomial logistic regression results for all genes from a range of datasets, including all predictors, both ignoring and considering  $BS \geq 70\%$  support. Parameters are not transformed i.e. they represent the estimated ceteris paribus effect of the predictor on log odds. Quantities in brackets are standard errors.

| Dependent variable: Total Concordant/Total Discordant |                       |                         |                         |                         |                       |                       |                         |                         |                        |                        |
|-------------------------------------------------------|-----------------------|-------------------------|-------------------------|-------------------------|-----------------------|-----------------------|-------------------------|-------------------------|------------------------|------------------------|
|                                                       | FSA cln AA            | FSA cln AA              | FSA cln nuc             | FSA cln nuc             | MAFFT AA              | MAFFT AA              | MAFFT nuc               | MAFFT nuc               | WAG                    | WAG                    |
|                                                       | $BS \geq 70$          |                         | $BS \geq 70$            |                         | $BS \geq 70$          |                       | $BS \geq 70$            |                         |                        | $BS \geq 70$           |
| alignment_length                                      | 0.001***<br>(0.0001)  | 0.001***<br>(0.0001)    | 0.001***<br>(0.00004)   | 0.001***<br>(0.00004)   | 0.001***<br>(0.0001)  | 0.001***<br>(0.0001)  | 0.0003***<br>(0.00003)  | 0.0004***<br>(0.00003)  | 0.0002***<br>(0.00004) | 0.0002***<br>(0.00004) |
| tree_length                                           | 0.539***<br>(0.049)   | 0.746***<br>(0.070)     | 1.124***<br>(0.103)     | 1.350***<br>(0.122)     | 0.680***<br>(0.042)   | 0.702***<br>(0.049)   | 0.925***<br>(0.085)     | 1.390***<br>(0.115)     | 0.616***<br>(0.051)    | 0.736***<br>(0.075)    |
| variance                                              | -39.588***<br>(7.572) | -106.125***<br>(13.084) | -245.838***<br>(32.927) | -374.209***<br>(38.174) | -62.247***<br>(3.966) | -63.180***<br>(4.486) | -145.851***<br>(17.464) | -371.749***<br>(33.871) | -53.085***<br>(8.321)  | -99.388***<br>(15.877) |
| Constant                                              | -2.238***<br>(0.073)  | -3.261***<br>(0.102)    | -1.738***<br>(0.102)    | -2.852***<br>(0.129)    | -2.427***<br>(0.077)  | -3.468***<br>(0.107)  | -1.489***<br>(0.095)    | -2.721***<br>(0.124)    | -2.062***<br>(0.070)   | -2.982***<br>(0.096)   |
| Observations                                          | 79                    | 79                      | 79                      | 79                      | 79                    | 79                    | 79                      | 79                      | 79                     | 79                     |
| Log Likelihood                                        | -319.263              | -201.664                | -283.221                | -246.157                | -281.726              | -184.137              | -348.941                | -280.545                | -345.767               | -233.138               |
| Akaike Inf. Crit.                                     | 646.526               | 411.327                 | 574.443                 | 500.313                 | 571.451               | 376.274               | 705.883                 | 569.090                 | 699.535                | 474.275                |

Note: \* p<0.1; \*\* p<0.05; \*\*\* p<0.01
