# Supplementary material for: Characterizing gene tree conflict in plastome-inferred phylogenies
Source: PeerJ journal article supplement (doi:10.7717/peerj.7747), 2019-09-24
Supplement: TableS3_fullqmod_fulldat.pdf [file TableS3_fullqmod_fulldat.pdf]

**Table S3:** Quasibinomial logistic regression results for all genes from a range of datasets, including all predictors, both ignoring and considering  $BS \geq 70\%$  support. Parameters are not transformed i.e. they represent the estimated ceteris paribus effect of the predictor on log odds. Quantities in brackets are standard errors. Dispersion gives the estimated quasibinomial dispersion parameter.

| Dependent variable: Total Concordant/Total Discordant |                       |                       |                         |                         |                       |                       |                         |                         |                        |                        |     |              |
|-------------------------------------------------------|-----------------------|-----------------------|-------------------------|-------------------------|-----------------------|-----------------------|-------------------------|-------------------------|------------------------|------------------------|-----|--------------|
|                                                       | FSA cln AA            |                       | FSA cln AA              |                         | FSA cln nuc           |                       | MAFFT AA                |                         | MAFFT nuc              |                        | WAG | WAG          |
|                                                       | BS $\geq$ 70          |                       | BS $\geq$ 70            |                         | BS $\geq$ 70          |                       | BS $\geq$ 70            |                         | BS $\geq$ 70           |                        |     | BS $\geq$ 70 |
| alignment_length                                      | 0.001***<br>(0.0003)  | 0.001<br>(0.001)      | 0.001***<br>(0.0001)    | 0.001***<br>(0.0001)    | 0.001***<br>(0.0002)  | 0.001***<br>(0.0001)  | 0.0003***<br>(0.0001)   | 0.0004***<br>(0.0001)   | 0.0002**<br>(0.0001)   | 0.0002**<br>(0.0001)   |     |              |
| tree_length                                           | 0.539***<br>(0.122)   | 0.746<br>(0.709)      | 1.124***<br>(0.185)     | 1.350***<br>(0.199)     | 0.680***<br>(0.085)   | 0.702***<br>(0.066)   | 0.925***<br>(0.193)     | 1.390***<br>(0.256)     | 0.616***<br>(0.122)    | 0.736***<br>(0.169)    |     |              |
| variance                                              | -39.588**<br>(18.726) | -106.125<br>(133.489) | -245.838***<br>(59.407) | -374.209***<br>(62.058) | -62.247***<br>(7.986) | -63.180***<br>(6.008) | -145.851***<br>(39.803) | -371.749***<br>(75.183) | -53.085***<br>(19.897) | -99.388***<br>(35.646) |     |              |
| Constant                                              | -2.238***<br>(0.182)  | -3.261***<br>(1.036)  | -1.738***<br>(0.185)    | -2.852***<br>(0.210)    | -2.427***<br>(0.155)  | -3.468***<br>(0.144)  | -1.489***<br>(0.216)    | -2.721***<br>(0.275)    | -2.062***<br>(0.167)   | -2.982***<br>(0.216)   |     |              |
| Dispersion                                            | 6.116                 | 104.083               | 3.255                   | 2.643                   | 4.054                 | 1.794                 | 5.194                   | 4.927                   | 5.718                  | 5.041                  |     |              |
| Observations                                          | 79                    | 79                    | 79                      | 79                      | 79                    | 79                    | 79                      | 79                      | 79                     | 79                     |     |              |

Note: \*p<0.1; \*\*p<0.05; \*\*\*p<0.01
