# Supplementary material for: Characterizing gene tree conflict in plastome-inferred phylogenies
Source: PeerJ journal article supplement (doi:10.7717/peerj.7747), 2019-09-24
Supplement: TableS5_fullqmod_reddat.pdf [file TableS5_fullqmod_reddat.pdf]

**Table S5:** Quasibinomial logistic regression results for a range of datasets, excluding highly influential genes based on studentized residuals, leverage and Cook's distance and including all predictors, both ignoring and considering BS  $\geq 70\%$  support. Parameters are not transformed i.e. they represent the estimated ceteris paribus effect of the predictor on log odds. Quantities in brackets are standard errors. Dispersion gives the estimated quasibinomial dispersion parameter. The genes *ycf1* and *ycf2* were uniformly removed due to their long tree and alignment length. Other genes removed are as follows: FSA AA cln, FSA AA cln BS  $\geq 70$ : *rpl32*, high tree length. FSA nuc cln: *clpP*, poor concordance relative to length; *rps15*, relatively high tree length. FSA nuc cln BS  $\geq 70$ : as not considering support, but *clpP* is included. MAFFT AA: *ndhJ*, high concordance relative to length; *rpl22*, high tree length; *rpl32*, high tree length. MAFFT AA BS  $\geq 70$ : *rpoB*, highly concordant relative to length and tree length. MAFFT nuc: *clpP*, poor concordance relative to alignment and tree length. MAFFT nuc BS  $\geq 70$ : *rps15*, poor performance relative to tree length. WAG: *rpl32*, high tree length; *rpoC2*, very high concordance. WAG BS  $\geq 70$ : *rpoC2*, very high concordance.

| Dependent variable: Total Concordant/Total Discordant |                            |                            |                             |                             |                          |                          |                           |                           |                        |                        |
|-------------------------------------------------------|----------------------------|----------------------------|-----------------------------|-----------------------------|--------------------------|--------------------------|---------------------------|---------------------------|------------------------|------------------------|
|                                                       | FSA cln AA<br>BS $\geq 70$ | FSA cln AA<br>BS $\geq 70$ | FSA cln nuc<br>BS $\geq 70$ | FSA cln nuc<br>BS $\geq 70$ | MAFFT AA<br>BS $\geq 70$ | MAFFT AA<br>BS $\geq 70$ | MAFFT nuc<br>BS $\geq 70$ | MAFFT nuc<br>BS $\geq 70$ | WAG                    | WAG<br>BS $\geq 70$    |
| alignment_length                                      | 0.002***<br>(0.0003)       | 0.002***<br>(0.0003)       | 0.001***<br>(0.0001)        | 0.001***<br>(0.0001)        | 0.002***<br>(0.0003)     | 0.002***<br>(0.0003)     | 0.001***<br>(0.0001)      | 0.001***<br>(0.0001)      | 0.002***<br>(0.0003)   | 0.002***<br>(0.0003)   |
| tree_length                                           | 0.709***<br>(0.106)        | 0.709***<br>(0.106)        | 1.133***<br>(0.219)         | 1.063***<br>(0.174)         | 0.703***<br>(0.095)      | 0.545***<br>(0.089)      | 0.760***<br>(0.165)       | 0.819***<br>(0.154)       | 0.636***<br>(0.111)    | 0.536***<br>(0.087)    |
| variance                                              | -51.572**<br>(19.572)      | -51.572**<br>(19.572)      | -214.123**<br>(92.790)      | -174.957***<br>(56.550)     | -57.590***<br>(15.331)   | -36.888***<br>(12.453)   | -85.038**<br>(37.736)     | -92.043***<br>(27.252)    | -55.714***<br>(19.996) | -32.252***<br>(11.672) |
| Constant                                              | -2.715***<br>(0.152)       | -2.715***<br>(0.152)       | -1.949***<br>(0.173)        | -1.927***<br>(0.167)        | -2.736***<br>(0.145)     | -2.580***<br>(0.151)     | -1.800***<br>(0.175)      | -1.840***<br>(0.173)      | -2.562***<br>(0.146)   | -2.517***<br>(0.141)   |
| Dispersion                                            | 3                          | 3                          | 2.371                       | 2.352                       | 2.666                    | 3.319                    | 2.838                     | 2.761                     | 2.875                  | 2.898                  |
| Observations                                          | 76                         | 76                         | 75                          | 76                          | 74                       | 76                       | 76                        | 76                        | 75                     | 76                     |

Note: \*p<0.1; \*\*p<0.05; \*\*\*p<0.01
