# Supplementary material for: Characterizing gene tree conflict in plastome-inferred phylogenies
Source: PeerJ journal article supplement (doi:10.7717/peerj.7747), 2019-09-24
Supplement: TableS14_fullmod_fulldat.pdf [file TableS14_fullmod_fulldat.pdf]

**Table S14:** Binomial logistic regression results for all genes from both amino acid and nucleotide datasets, including all predictors, both ignoring and considering BS  $\geq$  70% support. Parameters are not transformed, i.e. they represent the estimated ceteris paribus effect of the predictor on log odds. Quantities in brackets are standard errors.

| Dependent variable: Total Concordant/Total Discordant |                        |                        |                         |                         |
|-------------------------------------------------------|------------------------|------------------------|-------------------------|-------------------------|
|                                                       | <i>logistic</i>        |                        |                         |                         |
|                                                       | AA                     | AA BS $\geq$ 70        | Nuc                     | Nuc BS $\geq$ 70        |
| Length                                                | 0.0002***<br>(0.00004) | 0.0002***<br>(0.00004) | 0.0002***<br>(0.00002)  | 0.0002***<br>(0.00002)  |
| Tree_Length                                           | 0.589***<br>(0.046)    | 0.701***<br>(0.063)    | 1.306***<br>(0.104)     | 1.649***<br>(0.127)     |
| Root-to-tip Variance                                  | -41.119***<br>(5.551)  | -74.377***<br>(10.768) | -310.777***<br>(34.320) | -504.933***<br>(43.698) |
| Constant                                              | -2.012***<br>(0.069)   | -2.968***<br>(0.093)   | -1.618***<br>(0.101)    | -2.732***<br>(0.127)    |
| Observations                                          | 79                     | 79                     | 79                      | 79                      |
| Log Likelihood                                        | -383.756               | -249.108               | -341.953                | -312.632                |
| Akaike Inf. Crit.                                     | 775.513                | 506.217                | 691.906                 | 633.263                 |

*Note:* \* p<0.1; \*\* p<0.05; \*\*\* p<0.01
