# Supplementary material for: Characterizing gene tree conflict in plastome-inferred phylogenies
Source: PeerJ journal article supplement (doi:10.7717/peerj.7747), 2019-09-24
Supplement: TableS15_fullmod_reddat.pdf [file TableS15_fullmod_reddat.pdf]

**Table S15:** Binomial logistic regression results for a range of datasets, excluding highly influential genes based on studentized residuals, leverage and Cook's distance and including all predictors, both ignoring and considering BS  $\geq 70\%$  support. Parameters are not transformed i.e. they represent the estimated *ceteris paribus* effect of the predictor on log odds. Quantities in brackets are standard errors. For details of genes removed, see main text.

| Dependent variable: Total Concordant/Total Discordant |                        |                        |                         |                         |
|-------------------------------------------------------|------------------------|------------------------|-------------------------|-------------------------|
| <i>logistic</i>                                       |                        |                        |                         |                         |
|                                                       | AA                     | AA BS $\geq 70$        | Nuc                     | Nuc BS $\geq 70$        |
| Length                                                | 0.002***<br>(0.0001)   | 0.002***<br>(0.0002)   | 0.001***<br>(0.0001)    | 0.001***<br>(0.0001)    |
| Tree_Length                                           | 0.772***<br>(0.068)    | 0.677***<br>(0.083)    | 1.138***<br>(0.145)     | 1.138***<br>(0.145)     |
| Root-to-tip Variance                                  | -98.944***<br>(15.412) | -76.416***<br>(20.333) | -234.793***<br>(55.806) | -234.793***<br>(55.806) |
| Constant                                              | -2.546***<br>(0.083)   | -3.557***<br>(0.111)   | -1.894***<br>(0.113)    | -1.894***<br>(0.113)    |
| Observations                                          | 75                     | 75                     | 75                      | 75                      |
| Log Likelihood                                        | -257.248               | -156.195               | -253.832                | -253.832                |
| Akaike Inf. Crit.                                     | 522.496                | 320.391                | 515.665                 | 515.665                 |

*Note:* \* p<0.1; \*\* p<0.05; \*\*\* p<0.01
