# Supplementary material for: Characterizing gene tree conflict in plastome-inferred phylogenies
Source: PeerJ journal article supplement (doi:10.7717/peerj.7747), 2019-09-24
Supplement: TableS16_fullqmod_fulldat.pdf [file TableS16_fullqmod_fulldat.pdf]

**Table S16:** Quasibinomial logistic regression results for all genes from both amino acid and nucleotide datasets, including all predictors, both ignoring and considering BS  $\geq 70\%$  support. Parameters are not transformed i.e. they represent the estimated ceteris paribus effect of the predictor on log odds. Quantities in brackets are standard errors. Dispersion gives the estimated quasibinomial dispersion parameter.

| Dependent variable: Total Concordant/Total Discordant |                        |                       |                         |                         |
|-------------------------------------------------------|------------------------|-----------------------|-------------------------|-------------------------|
| <i>glm: quasibinomial</i>                             |                        |                       |                         |                         |
| <i>link = logit</i>                                   |                        |                       |                         |                         |
|                                                       | AA                     | AA BS $\geq 70$       | Nuc                     | Nuc BS $\geq 70$        |
| Length                                                | 0.0002**<br>(0.0001)   | 0.0002*<br>(0.0001)   | 0.0002***<br>(0.00004)  | 0.0002***<br>(0.00004)  |
| Tree_Length                                           | 0.589***<br>(0.123)    | 0.701***<br>(0.186)   | 1.306***<br>(0.222)     | 1.649***<br>(0.266)     |
| Root-to-tip Variance                                  | -41.119***<br>(14.787) | -74.377**<br>(31.532) | -310.777***<br>(73.500) | -504.933***<br>(91.484) |
| Constant                                              | -2.012***<br>(0.183)   | -2.968***<br>(0.273)  | -1.618***<br>(0.215)    | -2.732***<br>(0.266)    |
| Dispersion                                            | 7.096                  | 8.575                 | 4.587                   | 4.383                   |
| Observations                                          | 79                     | 79                    | 79                      | 79                      |

*Note:* \* p<0.1; \*\* p<0.05; \*\*\* p<0.01
