# Supplementary material for: Characterizing gene tree conflict in plastome-inferred phylogenies
Source: PeerJ journal article supplement (doi:10.7717/peerj.7747), 2019-09-24
Supplement: TableS17_fullqmod_reddat.pdf [file TableS17_fullqmod_reddat.pdf]

**Table S17:** Quasibinomial logistic regression results for a range of datasets, excluding highly influential genes based on studentized residuals, leverage and Cook’s distance and including all predictors, both ignoring and considering BS  $\geq 70\%$  support. Parameters are not transformed i.e. they represent the estimated ceteris paribus effect of the predictor on log odds. Quantities in brackets are standard errors. Dispersion gives the estimated quasibinomial dispersion parameter. For details of genes removed see main text.

| Dependent variable: Total Concordant/Total Discordant |                                    |                                    |                                    |                                    |
|-------------------------------------------------------|------------------------------------|------------------------------------|------------------------------------|------------------------------------|
| <i>glm: quasibinomial</i>                             |                                    |                                    |                                    |                                    |
| <i>link = logit</i>                                   |                                    |                                    |                                    |                                    |
|                                                       | AA                                 | AA BS $\geq 70$                    | Nuc                                | Nuc BS $\geq 70$                   |
| Length                                                | 0.002 <sup>***</sup><br>(0.0003)   | 0.002 <sup>***</sup><br>(0.0002)   | 0.001 <sup>***</sup><br>(0.0001)   | 0.001 <sup>***</sup><br>(0.0001)   |
| Tree_Length                                           | 0.772 <sup>***</sup><br>(0.129)    | 0.677 <sup>***</sup><br>(0.094)    | 1.138 <sup>***</sup><br>(0.242)    | 1.138 <sup>***</sup><br>(0.242)    |
| Root-to-tip Variance                                  | -98.944 <sup>***</sup><br>(29.067) | -76.416 <sup>***</sup><br>(22.918) | -234.793 <sup>**</sup><br>(93.245) | -234.793 <sup>**</sup><br>(93.245) |
| Constant                                              | -2.546 <sup>***</sup><br>(0.156)   | -3.557 <sup>***</sup><br>(0.126)   | -1.894 <sup>***</sup><br>(0.189)   | -1.894 <sup>***</sup><br>(0.189)   |
| Dispersion                                            | 3.557                              | 1.27                               | 2.792                              | 2.792                              |
| Observations                                          | 75                                 | 75                                 | 75                                 | 75                                 |

*Note:* \* p<0.1; \*\* p<0.05; \*\*\* p<0.01
