# Supplementary material for: Characterizing gene tree conflict in plastome-inferred phylogenies
Source: PeerJ journal article supplement (doi:10.7717/peerj.7747), 2019-09-24
Supplement: TableS18_redmod_fulldat.pdf [file TableS18_redmod_fulldat.pdf]

**Table S18:** Binomial logistic regression results for amino acid and nucleotide datasets, including only alignment length and tree length, both ignoring and considering  $BS \geq 70\%$  support. Parameters are not transformed i.e. they represent the estimated ceteris paribus effect of the predictor on log odds.

| Dependent Variable: Total Concordant/Total Discordant |                        |                        |                        |                        |
|-------------------------------------------------------|------------------------|------------------------|------------------------|------------------------|
|                                                       | <i>logistic</i>        |                        |                        |                        |
|                                                       | AA                     | AA $BS \geq 70$        | Nuc                    | Nuc $BS \geq 70$       |
| Length                                                | 0.0002***<br>(0.00004) | 0.0002***<br>(0.00003) | 0.0001***<br>(0.00002) | 0.0001***<br>(0.00001) |
| Tree_Length                                           | 0.266***<br>(0.027)    | 0.223***<br>(0.032)    | 0.567***<br>(0.063)    | 0.412***<br>(0.068)    |
| Constant                                              | -1.756***<br>(0.060)   | -2.575***<br>(0.076)   | -1.187***<br>(0.087)   | -1.867***<br>(0.097)   |
| Observations                                          | 79                     | 79                     | 79                     | 79                     |
| Log Likelihood                                        | -430.988               | -295.026               | -390.554               | -395.112               |
| Akaike Inf. Crit.                                     | 867.975                | 596.053                | 787.109                | 796.225                |

*Note:* \*  $p < 0.1$ ; \*\*  $p < 0.05$ ; \*\*\*  $p < 0.01$
