# Supplementary material for: Characterizing gene tree conflict in plastome-inferred phylogenies
Source: PeerJ journal article supplement (doi:10.7717/peerj.7747), 2019-09-24
Supplement: TableS20_redqmod_fulldat.pdf [file TableS20_redqmod_fulldat.pdf]

**Table S20:** Quasibinomial logistic regression results for amino acid and nucleotide datasets, including only alignment length and tree length, both ignoring and considering BS  $\geq$  70% support. Parameters are not transformed i.e. they represent the estimated ceteris paribus effect of the predictor on log odds. Dispersion gives the estimated quasibinomial dispersion parameter.

| Dependent Variable: Total Concordant/Total Discordant |                      |                      |                       |                        |
|-------------------------------------------------------|----------------------|----------------------|-----------------------|------------------------|
| <i>glm: quasibinomial</i>                             |                      |                      |                       |                        |
| <i>link = logit</i>                                   |                      |                      |                       |                        |
|                                                       | AA                   | AA BS $\geq$ 70      | Nuc                   | Nuc BS $\geq$ 70       |
| Length                                                | 0.0002**<br>(0.0001) | 0.0002**<br>(0.0001) | 0.0001***<br>(0.0001) | 0.0001***<br>(0.00004) |
| Tree_Length                                           | 0.266***<br>(0.076)  | 0.223***<br>(0.072)  | 0.567***<br>(0.166)   | 0.412**<br>(0.176)     |
| Constant                                              | -1.756***<br>(0.168) | -2.575***<br>(0.173) | -1.187***<br>(0.229)  | -1.867***<br>(0.249)   |
| Dispersion                                            | 7.827                | 5.175                | 6.862                 | 6.621                  |
| Observations                                          | 79                   | 79                   | 79                    | 79                     |

*Note:* \* p<0.1; \*\* p<0.05; \*\*\* p<0.01
